# Supplementary material for: Photocatalyst-free visible light driven synthesis of gem-dihaloenones from alkynes, tetrahalomethanes and water
Source: Royal Society of Chemistry journal article supplement (doi:10.1039/d2ob01983c), 2022-11-17
Supplement: d2ob01983c1.pdf [file d2ob01983c1.pdf]

## Supporting Information

### Photocatalyst-free Visible Light Driven Synthesis of *gem*-dihaloenones from Alkynes, Tetrahalomethanes and Water

Fuqing Zhang,<sup>a</sup> Zixiang Wei,<sup>a</sup> Wei Wu,<sup>b</sup> Na Liu,<sup>a,b</sup> Xinhan Li,<sup>a</sup> Luqian Zou,<sup>a</sup> Kaiming Wang,<sup>a</sup> Jianbin Xu\*<sup>a, b</sup> and Baomin Fan\*<sup>a, b</sup>

[a] School of Chemistry and Environment, Yunnan Minzu University, Kunming, 650500, China.

[b] Key Laboratory of Chemistry in Ethnic Medicinal Resources, State Ethnic Affairs Commission & Ministry of Education, Yunnan Minzu University, Kunming, Yunnan, 650504, China

E-mail addresses: xujianbin@ymu.edu.cn (Dr. Jianbin Xu); adams.bmf@hotmail.com (Prof. Baomin Fan).

### Table of contents

|                                                                                                    |           |
|----------------------------------------------------------------------------------------------------|-----------|
| <b>1. General information.....</b>                                                                 | <b>2</b>  |
| <b>2. General procedure for the synthesis of <math>\alpha</math>- <i>gem</i>-dihaloenones.....</b> | <b>2</b>  |
| <b>3. Control Experiment with H<sub>2</sub><sup>18</sup>O.....</b>                                 | <b>2</b>  |
| <b>4. UV-Vis Absorption Spectra.....</b>                                                           | <b>3</b>  |
| <b>5. Light/Dark experiment.....</b>                                                               | <b>4</b>  |
| <b>6. Emission spectrum of LED lamp.....</b>                                                       | <b>5</b>  |
| <b>7. Spectral data of products.....</b>                                                           | <b>5</b>  |
| <b>8. NMR Spectral of <math>\alpha</math>-<i>gem</i>-dihalovinyl ketones.....</b>                  | <b>18</b> |
| <b>9. References.....</b>                                                                          | <b>57</b> |

## 1. General information

All commercially available reagents were obtained from commercial suppliers and used without further purification. All catalytic experiments were performed under an atmosphere of argon by using Glove Box.  $^1\text{H}$  NMR (400 MHz) and  $^{13}\text{C}$  NMR (100 MHz) spectra were recorded on a Bruker NMR spectrometer in  $\text{CDCl}_3$  using TMS as an internal reference with chemical shift values reported in ppm. Abbreviations used in the NMR follow-up experiments: s, singlet; d, doublet; t, triplet; q, quartet; m, multiplet.

HRESIMS data were recorded on an LCMS-IT-TOF mass spectrometer (Shimadzu, Kyoto, Japan).

## 2. General procedure for the synthesis of $\alpha$ -gem-dihaloenones

To an oven dried Schlenk-tube,  $\text{CBr}_4$  (0.4 mmol), Methanol (1.5 mL) were added under argon atmosphere. phenylacetylene (0.2 mmol) and ultrapure water (100  $\mu\text{L}$ ) was added to the reaction mixture. The reaction mixture was stirred under the irradiation of 30 W LEDs (460 nm - 470 nm) at room temperature. After completion of the reaction (indicated by GC), the solution was concentrated in vacuum and the product was purified by silica gel column chromatography.

## 3. Control Experiment with $\text{H}_2^{18}\text{O}$

To an oven dried Schlenk-tube,  $\text{CBr}_4$  (0.4 mmol), Methanol (1.5 mL) were added under argon atmosphere. phenylacetylene (0.2 mmol) and  $\text{H}_2^{18}\text{O}$  (100  $\mu\text{L}$ ) was added to the reaction mixture. The reaction mixture was stirred under the irradiation of 30 W LEDs (460 nm - 470 nm) at room temperature. After completion of the reaction (indicated by GC), the solution was concentrated in vacuum and the product was purified by silica gel column chromatography to obtain **3a- $^{18}\text{O}$** .

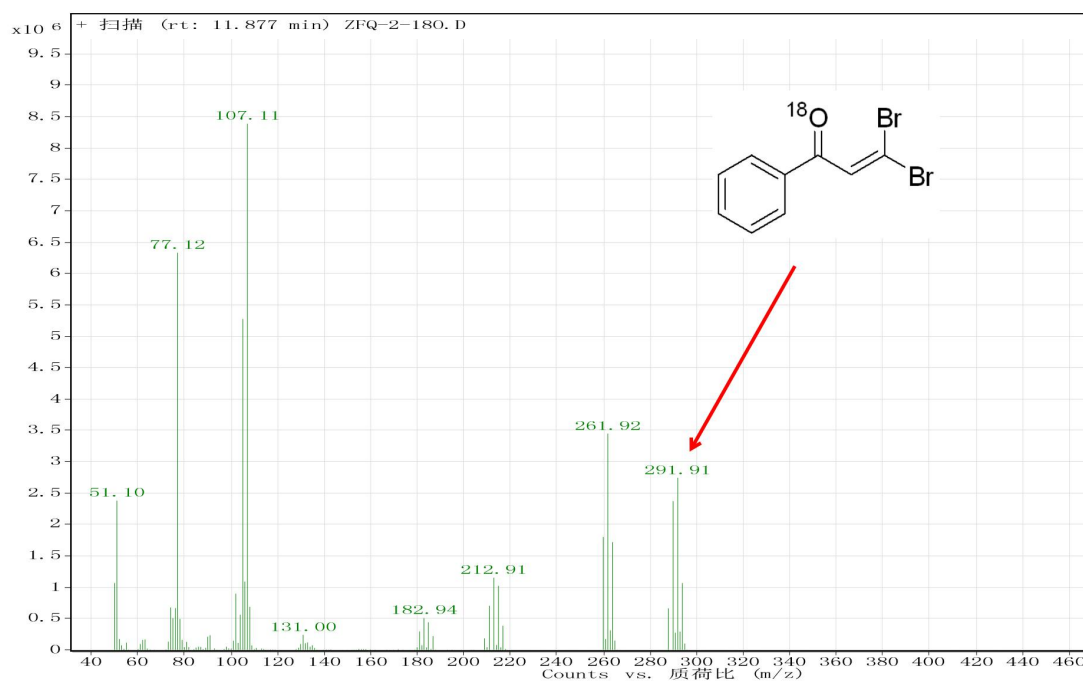

**Figure S2.** GC spectrum of 3a-<sup>18</sup>O

#### 4. UV-Vis Absorption Spectra

The UV-Vis Absorption Spectra of phenylacetylene and CBr<sub>4</sub> in Methanol was introduced to a 1 cm path length quartz cuvette and analyzed using a Agilent Technologies Cary 8454 UV/Vis. The UV/vis spectrum of phenylacetylene showed no absorption. The ultraviolet/visible spectra of CBr<sub>4</sub> show weak absorption.

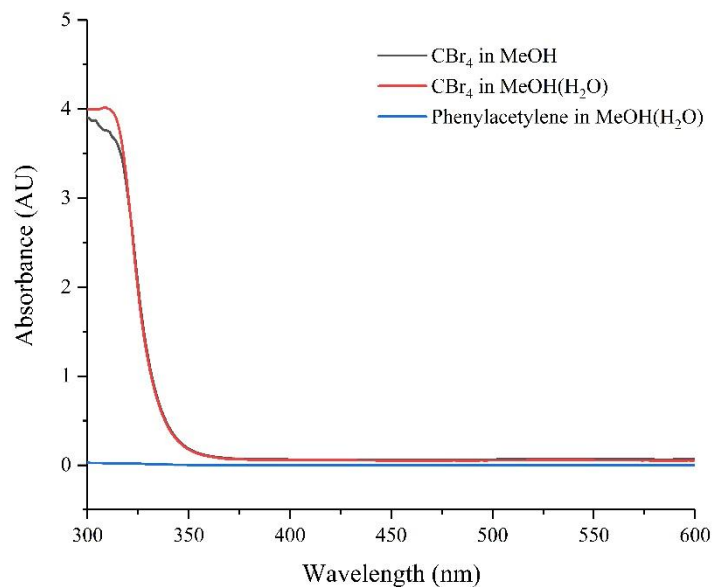

**Figure S2.** UV-Vis absorption spectra of phenylacetylene and CBr<sub>4</sub>

### 5. Light/Dark experiment

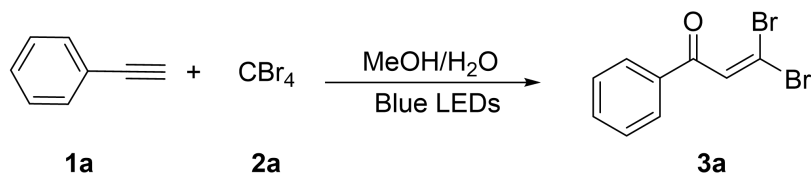

To an oven dried Schlenk-tube, CBr<sub>4</sub> (0.4 mmol), Methanol (1.5 mL) were added under argon atmosphere. phenylacetylene (0.2 mmol) and ultrapure water (100  $\mu$ L) was added to the reaction mixture. The reaction mixture was stirred under the irradiation of 30 W LEDs (460 nm - 470 nm) at room temperature. The reaction tube was wrapped in tin foil and a 10  $\mu$ L sample of the reaction mixture was taken with a syringe and measured by GC. After being stirred for 4 hours in dark, a 10  $\mu$ L sample of the reaction mixture was taken with a syringe and measured by GC. The reaction mixture was then irradiated with a 30 W blue LEDs lamp and stirred for 4 hours. This process was repeated three times.

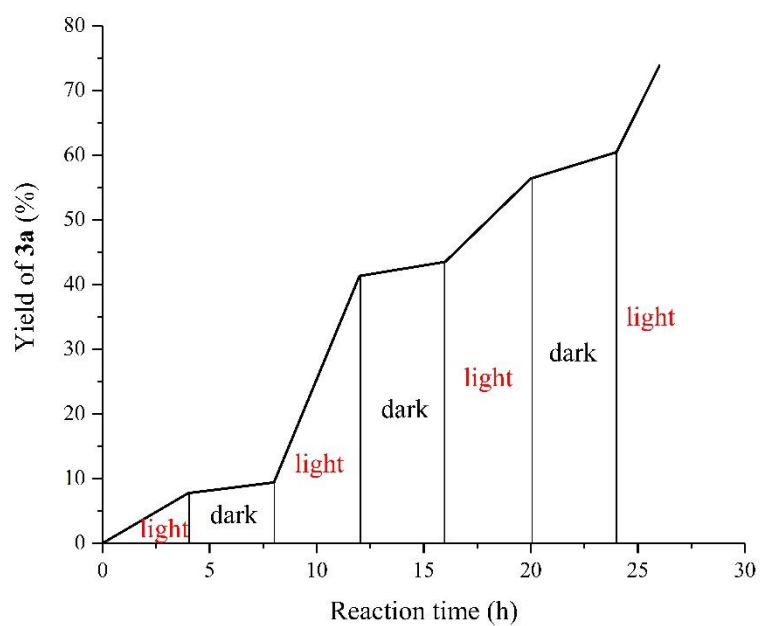

**Figure S3.** Light/Dark experiment

## 6. Emission spectrum of LED lamp

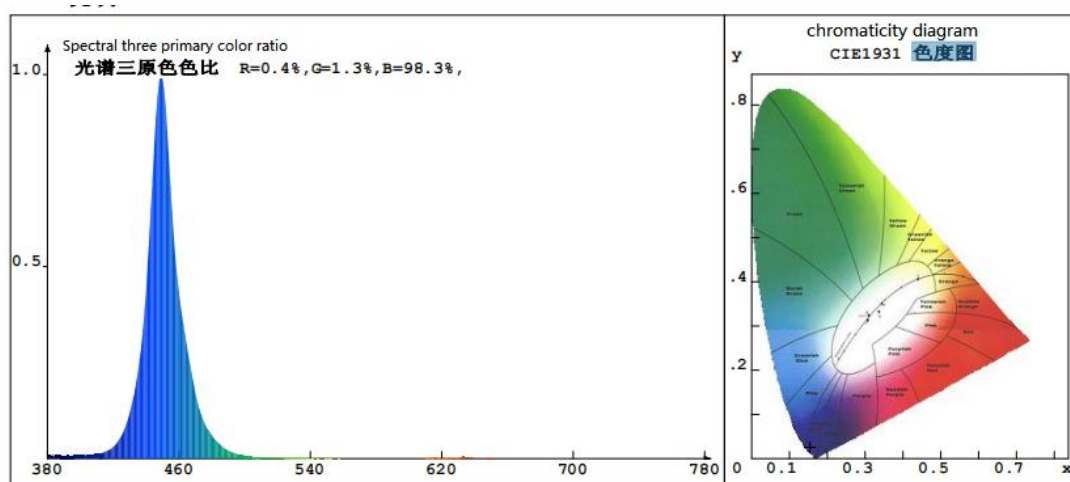

**Figure S4.** Emission spectrum

## 7. Spectral data of products

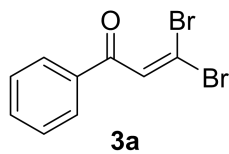

3,3-dibromo-1-phenylprop-2-en-1-one (**3a**)<sup>[1]</sup>

Purified by silica gel chromatography (petroleum), the desired product **3a** was obtained as a yellow oil. Yield: 42.2 mg (73%). <sup>1</sup>H NMR (400 MHz, Chloroform-*d*) δ 7.94 (dd, *J* = 8.4, 1.3 Hz, 2H), 7.85 (s, 1H), 7.64 – 7.59 (m, 1H), 7.50 (dd, *J* = 8.3, 7.0 Hz, 2H). <sup>13</sup>C NMR (101 MHz, Chloroform-*d*) δ 187.9, 136.5, 134.0, 132.7, 129.0, 128.8, 103.6.

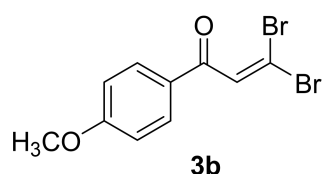

3,3-dibromo-1-(4-methoxyphenyl)prop-2-en-1-one (**3b**)<sup>[1]</sup>

Purified by silica gel chromatography (petroleum), the desired product **3b** was obtained as a yellow oil. Yield: 54.3 mg (85%). <sup>1</sup>H NMR (400 MHz, Chloroform-*d*) δ 7.91 (d, *J* = 8.9 Hz, 2H), 7.76 (s, 1H), 6.95 (d, *J* = 8.9 Hz, 2H), 3.87 (s, 3H). <sup>13</sup>C NMR (101 MHz, Chloroform-*d*) δ 186.7, 164.3, 133.2, 131.3, 129.3, 114.2, 101.7, 55.7.

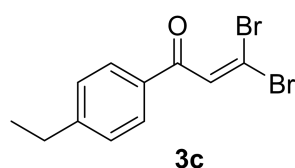

3,3-dibromo-1-(4-ethylphenyl)prop-2-en-1-one (**3c**)<sup>[1]</sup>

Purified by silica gel chromatography (petroleum), the desired product **3c** was obtained as a colorless oil. Yield: 52.6 mg (83%). <sup>1</sup>H NMR (400 MHz, Chloroform-*d*) δ 7.86 (d, *J* = 8.4 Hz, 2H), 7.82 (s, 1H), 7.31 (d, *J* = 8.4 Hz, 2H), 2.71 (q, *J* = 7.6 Hz, 2H), 1.26 (t, *J* = 7.6 Hz, 3H). <sup>13</sup>C NMR (101 MHz, Chloroform-*d*) δ 187.6, 151.2, 134.1, 132.9, 129.1, 128.5, 102.7, 29.1, 15.2.

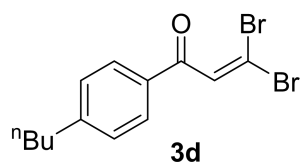

3,3-dibromo-1-(4-butylphenyl)prop-2-en-1-one (**3d**)<sup>[1]</sup>

Purified by silica gel chromatography (petroleum), the desired product **3d** was obtained as a yellow oil. Yield: 57.4 mg (83%). <sup>1</sup>H NMR (400 MHz, Chloroform-*d*) δ

7.83 (d,  $J = 8.0$  Hz, 3H), 7.33 – 7.26 (m, 2H), 2.72 – 2.63 (m, 2H), 1.61 (pd,  $J = 7.6$ , 1.5 Hz, 2H), 1.35 (ddd,  $J = 14.9$ , 7.4, 1.5 Hz, 2H), 0.97 – 0.89 (m, 3H).  $^{13}\text{C}$  NMR (101 MHz, Chloroform-*d*)  $\delta$  187.5, 150.0, 134.1, 132.9, 129.0, 129.0, 102.7, 35.9, 33.3, 22.4, 14.0.

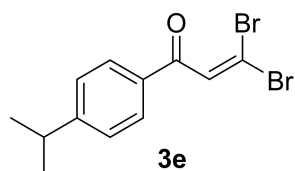

3,3-dibromo-1-(4-isopropylphenyl)prop-2-en-1-one (**3e**)

Purified by silica gel chromatography (petroleum), the desired product **3e** was obtained as a yellow oil. Yield: 50.8 mg (76%).  $^1\text{H}$  NMR (400 MHz, Chloroform-*d*)  $\delta$  7.91 – 7.85 (m, 2H), 7.83 (d,  $J = 1.1$  Hz, 1H), 7.53 – 7.47 (m, 2H), 1.34 (d,  $J = 1.2$  Hz, 9H).  $^{13}\text{C}$  NMR (101 MHz, Chloroform-*d*)  $\delta$  187.5, 158.0, 133.9, 132.9, 128.8, 126.0, 102.8, 35.4, 31.2. HRMS (ESI) calcd for  $\text{C}_{12}\text{H}_{13}\text{Br}_2\text{O}^+$   $[\text{M}+\text{H}]^+$  330.9328, found 330.9324

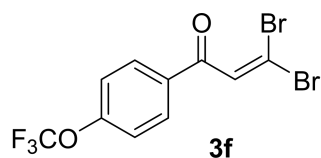

3,3-dibromo-1-(4-(trifluoromethoxy)phenyl)prop-2-en-1-one (**3f**)

Purified by silica gel chromatography (petroleum), the desired product **3f** was obtained as a yellow solid. Yield: 45.9 mg (61%). M.P. 39-41 °C.  $^1\text{H}$  NMR (400 MHz, Chloroform-*d*)  $\delta$  8.00 (d,  $J = 8.9$  Hz, 2H), 7.82 (s, 1H), 7.32 (d,  $J = 7.5$  Hz, 2H).  $^{13}\text{C}$  NMR (101 MHz, Chloroform-*d*)  $\delta$  186.4, 153.3 (q,  $J = 11.1$  Hz), 134.7, 132.1, 130.9, 120.7, 104.6.  $^{19}\text{F}$  NMR (376 MHz, Chloroform-*d*)  $\delta$  -57.6. HRMS (ESI) calcd for  $\text{C}_{10}\text{H}_6\text{Br}_2\text{F}_3\text{O}_2^+$   $[\text{M}+\text{H}]^+$  372.8681, found 372.8686

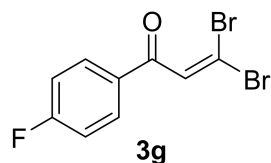

3,3-dibromo-1-(4-fluorophenyl)prop-2-en-1-one (**3g**)<sup>[1]</sup>

Purified by silica gel chromatography (petroleum), the desired product **3g** was obtained as a yellow oil. Yield: 31.7 mg (51%). <sup>1</sup>H NMR (400 MHz, Chloroform-*d*) δ 7.97 (dd, *J* = 8.9, 5.3 Hz, 2H), 7.79 (s, 1H), 7.20 – 7.13 (m, 2H). <sup>13</sup>C NMR (101 MHz, Chloroform-*d*) δ 186.4, 167.6, 165.0, 132.9 (d, *J* = 3.1 Hz), 132.5, 131.6 (d, *J* = 9.5 Hz), 116.3 (d, *J* = 22.0 Hz), 103.6. <sup>19</sup>F NMR (376 MHz, Chloroform-*d*) δ -103.3.

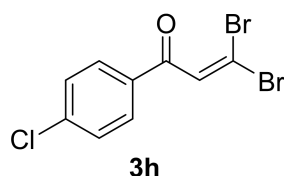

3,3-dibromo-1-(4-chlorophenyl)prop-2-en-1-one (**3h**)<sup>[1]</sup>

Purified by silica gel chromatography (petroleum), the desired product **3h** was obtained as a yellow solid. Yield: 31.9 mg (49%). <sup>1</sup>H NMR (400 MHz, Chloroform-*d*) δ 7.88 (d, *J* = 8.6 Hz, 2H), 7.80 (s, 1H), 7.48 (d, *J* = 8.5 Hz, 2H). <sup>13</sup>C NMR (101 MHz, Chloroform-*d*) δ 186.7, 140.6, 134.9, 132.2, 130.2, 129.4, 104.3.

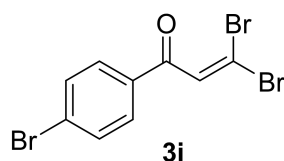

3,3-dibromo-1-(4-bromophenyl)prop-2-en-1-one (**3i**)<sup>[1]</sup>

Purified by silica gel chromatography (petroleum), the desired product **3i** was obtained as a yellow oil. Yield: 49.4 mg (67%). <sup>1</sup>H NMR (400 MHz, Chloroform-*d*) δ 7.80 (t, *J* = 4.3 Hz, 3H), 7.64 (d, *J* = 8.6 Hz, 2H). <sup>13</sup>C NMR (101 MHz, Chloroform-*d*) δ 186.9, 135.2, 132.4, 132.1, 130.2, 129.3, 104.5.

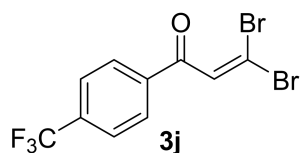

3,3-dibromo-1-(4-(trifluoromethyl)phenyl)prop-2-en-1-one (**3j**)<sup>[1]</sup>

Purified by silica gel chromatography (petroleum), the desired product **3j** was obtained as a yellow solid. Yield: 27.3 mg (38%). <sup>1</sup>H NMR (400 MHz, Chloroform-*d*) δ 8.04 (dt, *J* = 8.0, 0.9 Hz, 2H), 7.86 (s, 1H), 7.76 (d, *J* = 8.3 Hz, 2H). <sup>13</sup>C NMR (101 MHz, Chloroform-*d*) δ 186.8, 139.4 (d, *J* = 1.4 Hz), 135.1 (q, *J* = 32.8 Hz), 131.9,



130.4, 129.1, 128.8, 126.1 (q,  $J = 3.7$  Hz), 124.9 (d,  $J = 2.7$  Hz), 122.2, 105.7.  $^{19}\text{F}$  NMR (376 MHz, Chloroform- $d$ )  $\delta$  -63.2.

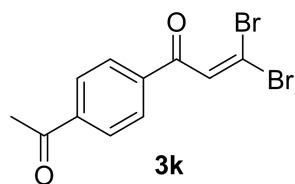

1-(4-acetylphenyl)-3,3-dibromoprop-2-en-1-one (**3k**)

Purified by silica gel chromatography (petroleum), the desired product **3k** was obtained as a colorless oil. Yield: 34.1 mg (51%). M.P. 62-63 °C.  $^1\text{H}$  NMR (400 MHz, Chloroform- $d$ )  $\delta$  8.06 – 7.99 (m, 4H), 7.87 (s, 1H), 2.65 (s, 3H).  $^{13}\text{C}$  NMR (101 MHz, Chloroform- $d$ )  $\delta$  197.4, 187.1, 140.7, 139.8, 132.1, 128.9, 105.3, 27.0. HRMS (ESI) calcd for  $\text{C}_{11}\text{H}_9\text{Br}_2\text{O}_2^+$   $[\text{M}+\text{H}]^+$  330.8964, found 330.8966

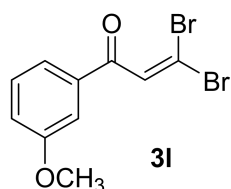

3,3-dibromo-1-(3-methoxyphenyl)prop-2-en-1-one (**3l**)<sup>[2]</sup>

Purified by silica gel chromatography (petroleum), the desired product **3l** was obtained as a yellow oil. Yield: 39.4 mg (62%).  $^1\text{H}$  NMR (400 MHz, Chloroform- $d$ )  $\delta$  7.83 (s, 1H), 7.50 – 7.45 (m, 2H), 7.39 (t,  $J = 7.9$  Hz, 1H), 7.16 – 7.12 (m, 1H), 3.86 (s, 3H).  $^{13}\text{C}$  NMR (101 MHz, Chloroform- $d$ )  $\delta$  187.6, 160.1, 137.8, 132.7, 130.0, 121.4, 120.6, 112.8, 103.6, 55.6.

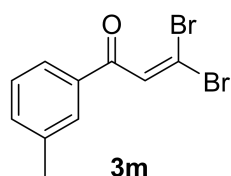

3,3-dibromo-1-(*m*-tolyl)prop-2-en-1-one (**3m**)<sup>[1]</sup>

Purified by silica gel chromatography (petroleum), the desired product **3m** was obtained as a yellow oil. Yield: 43.9 mg (72%).  $^1\text{H}$  NMR (400 MHz, Chloroform- $d$ )  $\delta$  7.83 (s, 1H), 7.75 – 7.71 (m, 2H), 7.44 – 7.35 (m, 2H), 2.42 (s, 3H).  $^{13}\text{C}$  NMR (101 MHz, Chloroform- $d$ )  $\delta$  188.0, 138.9, 136.5, 134.8, 132.9, 129.2, 128.9, 126.1, 103.2,

21.5.

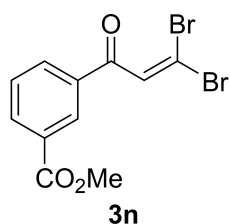

methyl 3-(3,3-dibromoacryloyl)benzoate (**3n**)

Purified by silica gel chromatography (petroleum), the desired product **3n** was obtained as a yellow solid. Yield: 38.6 mg (55%). M.P. 94-96 °C. <sup>1</sup>H NMR (400 MHz, Chloroform-*d*) δ 8.55 (t, *J* = 1.5 Hz, 1H), 8.27 (dt, *J* = 7.8, 1.4 Hz, 1H), 8.15 (dd, *J* = 7.8, 0.6 Hz, 1H), 7.91 (s, 1H), 7.60 (t, *J* = 7.8 Hz, 1H), 3.97 (s, 3H). <sup>13</sup>C NMR (101 MHz, Chloroform-*d*) δ 186.8, 166.1, 136.9, 134.6, 132.8, 132.0, 131.1, 129.6, 129.3, 105.0, 52.6. HRMS (ESI) calcd for C<sub>11</sub>H<sub>9</sub>Br<sub>2</sub>O<sub>3</sub><sup>+</sup> [M+H]<sup>+</sup> 346.8913, found 346.8916

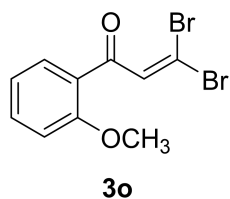

3,3-dibromo-1-(2-methoxyphenyl)prop-2-en-1-one (**3o**)

Purified by silica gel chromatography (petroleum), the desired product **3o** was obtained as a yellow oil. Yield: 20.8 mg (87%). <sup>1</sup>H NMR (400 MHz, Chloroform-*d*) δ 7.86 (s, 1H), 7.70 (dd, *J* = 7.7, 1.9 Hz, 1H), 7.49 (ddd, *J* = 8.4, 7.3, 1.9 Hz, 1H), 7.05 – 6.99 (m, 1H), 6.96 (d, *J* = 8.4 Hz, 1H), 3.92 (s, 3H). <sup>13</sup>C NMR (101 MHz, Chloroform-*d*) δ 188.1, 158.7, 136.2, 134.6, 131.2, 127.7, 121.1, 111.9, 101.6, 56.0. HRMS (ESI) calcd for C<sub>10</sub>H<sub>9</sub>Br<sub>2</sub>O<sub>2</sub><sup>+</sup> [M+H]<sup>+</sup> 318.8964, found 318.8969

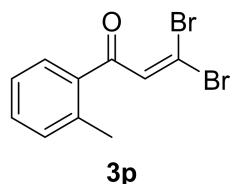

3,3-dibromo-1-(*o*-tolyl)prop-2-en-1-one (**3p**)<sup>[1]</sup>

Purified by silica gel chromatography (petroleum), the desired product **3p** was obtained as a yellow oil. Yield: 20.9 mg (34%). <sup>1</sup>H NMR (400 MHz, Chloroform-*d*) δ 7.64 (s, 1H), 7.61 (d, *J* = 7.6 Hz, 1H), 7.42 (td, *J* = 7.5, 1.5 Hz, 1H), 7.29 (dd, *J* = 11.5,

7.9 Hz, 2H), 2.54 (s, 3H).  $^{13}\text{C}$  NMR (101 MHz, Chloroform-*d*)  $\delta$  191.0, 139.4, 136.7, 135.4, 132.3, 132.2, 129.6, 126.0, 103.0, 21.2.

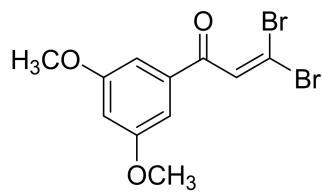

**3q**

3,3-dibromo-1-(3,5-dimethoxyphenyl)prop-2-en-1-one (**3q**)

Purified by silica gel chromatography (petroleum), the desired product **3q** was obtained as a yellow oil. Yield: 43.6 mg (62%). M.P. 68-60°C.  $^1\text{H}$  NMR (400 MHz, Chloroform-*d*)  $\delta$  7.79 (s, 1H), 7.05 (d,  $J = 2.1$  Hz, 2H), 6.67 (s, 1H), 3.84 (s, 6H).  $^{13}\text{C}$  NMR (101 MHz, Chloroform-*d*)  $\delta$  187.5, 161.2, 138.4, 132.6, 106.5, 106.2, 103.7, 55.8.

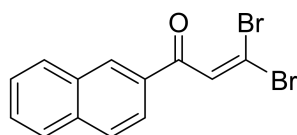

**3r**

3,3-dibromo-1-(naphthalen-2-yl)prop-2-en-1-one (**3r**)<sup>[3]</sup>

Purified by silica gel chromatography (petroleum), the desired product **3r** was obtained as a yellow oil. Yield: 42.1 mg (62%).  $^1\text{H}$  NMR (400 MHz, Chloroform-*d*)  $\delta$  8.42 (s, 1H), 8.03 – 7.97 (m, 3H), 7.91 (dd,  $J = 13.0, 8.4$  Hz, 2H), 7.66 – 7.55 (m, 2H).  $^{13}\text{C}$  NMR (101 MHz, Chloroform-*d*)  $\delta$  187.9, 136.0, 133.9, 132.9, 132.6, 131.0, 129.8, 129.2, 129.1, 128.0, 127.2, 124.0, 103.2.

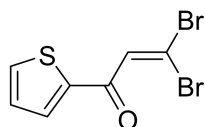

**3s**

3,3-dibromo-1-(thiophen-2-yl)prop-2-en-1-one (**3s**)<sup>[1]</sup>

Purified by silica gel chromatography (petroleum), the desired product **3s** was obtained as a yellow solid. Yield: 12.2 mg (21%).  $^1\text{H}$  NMR (400 MHz, Chloroform-*d*)  $\delta$  7.83 (s, 1H), 7.75 – 7.71 (m, 2H), 7.17 (dd,  $J = 4.9, 3.8$  Hz, 1H).  $^{13}\text{C}$  NMR (101 MHz, Chloroform-*d*)  $\delta$  179.4, 144.4, 135.4, 132.7, 131.4, 128.6, 105.0.

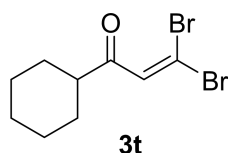

3,3-dibromo-1-cyclohexylprop-2-en-1-one (**3t**)

Purified by silica gel chromatography (petroleum), the desired product **3t** was obtained as a colorless oil. Yield: 20%. <sup>1</sup>H NMR (400 MHz, Chloroform-*d*) δ 7.34 (s, 1H), 2.37 (tt, *J* = 11.0, 3.4 Hz, 1H), 1.90 – 1.76 (m, 4H), 1.67 (ddd, *J* = 11.3, 3.5, 2.1 Hz, 1H), 1.40 – 1.21 (m, 5H). <sup>13</sup>C NMR (101 MHz, Chloroform-*d*) δ 199.4, 133.4, 103.5, 51.6, 28.1, 25.9, 25.6. HRMS (ESI) calcd for C<sub>9</sub>H<sub>13</sub>Br<sub>2</sub>O<sup>+</sup> [M+H]<sup>+</sup> 294.9328, found 294.9324.

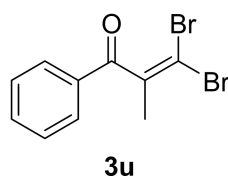

3,3-dibromo-2-methyl-1-phenylprop-2-en-1-one (**3u**)<sup>[2]</sup>

Purified by silica gel chromatography (petroleum), the desired product **3u** was obtained as a colorless oil. Yield: 19 mg (31%). <sup>1</sup>H NMR (400 MHz, Chloroform-*d*) δ 7.95 – 7.91 (m, 2H), 7.64 (t, *J* = 7.4 Hz, 1H), 7.52 (dd, *J* = 8.3, 7.0 Hz, 2H), 2.08 (s, 3H). <sup>13</sup>C NMR (101 MHz, Chloroform-*d*) δ 195.1, 142.6, 134.4, 133.8, 129.7, 129.2, 88.8, 22.4.

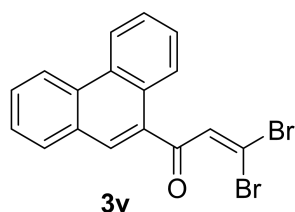

3,3-dibromo-1-(phenanthren-9-yl)prop-2-en-1-one (**3v**)

Purified by silica gel chromatography (petroleum), the desired product **3v** was obtained as a yellow solid. Yield: 11.9 mg (15%). M.P. 113-114°C. <sup>1</sup>H NMR (400 MHz, Chloroform-*d*) δ 8.76 – 8.61 (m, 3H), 8.17 (s, 1H), 7.99 (dd, *J* = 7.9, 1.4 Hz, 1H), 7.85 (s, 1H), 7.78 (ddd, *J* = 8.4, 7.0, 1.4 Hz, 1H), 7.75 – 7.63 (m, 3H). <sup>13</sup>C NMR (101 MHz, Chloroform-*d*) δ 190.7, 135.7, 133.8, 132.4, 132.1, 131.0, 130.3, 129.9, 129.6, 128.4, 127.9, 127.6, 127.4, 126.5, 123.1, 122.9, 103.9.

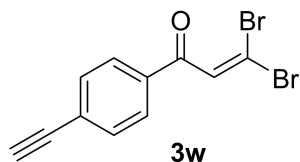

3,3-dibromo-1-(4-ethynylphenyl)prop-2-en-1-one (**3w**)

Purified by silica gel chromatography (petroleum), the desired product **3w** was obtained as a yellow solid. Yield: 11.4 mg (18%). M.P. 77-78°C. <sup>1</sup>H NMR (400 MHz, Chloroform-*d*) δ 7.89 (d, *J* = 8.4 Hz, 2H), 7.82 (s, 1H), 7.60 (d, *J* = 8.5 Hz, 2H), 3.29 (s, 1H). <sup>13</sup>C NMR (101 MHz, Chloroform-*d*) δ 187.0, 136.2, 132.7, 132.3, 128.7, 127.8, 104.4, 82.7, 81.2.

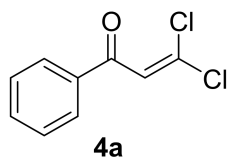

3,3-dichloro-1-phenylprop-2-en-1-one (**4a**)<sup>[2]</sup>

Purified by silica gel chromatography (petroleum), the desired product **4a** was obtained as a colorless oil. Yield: 20 mg (50%). <sup>1</sup>H NMR (400 MHz, Chloroform-*d*) δ 7.93 (d, *J* = 7.0 Hz, 1H), 7.61 (t, *J* = 7.4 Hz, 1H), 7.50 (t, *J* = 7.7 Hz, 1H), 7.28 (s, 1H). <sup>13</sup>C NMR (101 MHz, Chloroform-*d*) δ 186.8, 137.1, 135.7, 133.9, 129.0, 128.6, 124.2.

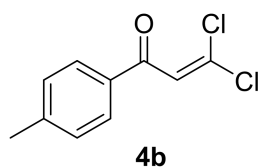

3,3-dichloro-1-(*p*-tolyl)prop-2-en-1-one (**4b**)<sup>[2]</sup>

Purified by silica gel chromatography (petroleum), the desired product **4b** was obtained as a colorless oil. Yield: 26.0 mg (60%). <sup>1</sup>H NMR (400 MHz, Chloroform-*d*) δ 7.93 (d, *J* = 7.0 Hz, 2H), 7.61 (t, *J* = 7.4 Hz, 1H), 7.50 (t, *J* = 7.7 Hz, 2H), 7.28 (s, 1H). <sup>13</sup>C NMR (101 MHz, Chloroform-*d*) δ 186.8, 137.1, 135.7, 133.9, 129.0, 128.6, 124.2.

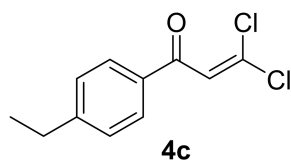

3,3-dichloro-1-(4-ethylphenyl)prop-2-en-1-one (**4c**)<sup>[2]</sup>

Purified by silica gel chromatography (petroleum), the desired product **4c** was obtained as a colorless oil. Yield: 32.0 mg (70%). <sup>1</sup>H NMR (400 MHz, Chloroform-*d*) δ 7.85 (d, *J* = 8.3 Hz, 2H), 7.31 (d, *J* = 8.3 Hz, 2H), 7.25 (s, 1H), 2.72 (q, *J* = 7.6 Hz, 2H), 1.26 (t, *J* = 7.6 Hz, 3H). <sup>13</sup>C NMR (101 MHz, Chloroform-*d*) δ 186.5, 151.1, 135.0, 134.7, 128.9, 128.5, 124.4, 29.1, 15.2.

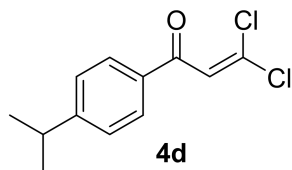

3,3-dichloro-1-(4-isopropylphenyl)prop-2-en-1-one (**4d**)

Purified by silica gel chromatography (petroleum), the desired product **4d** was obtained as a colorless oil. Yield: 31.8 mg (65%). <sup>1</sup>H NMR (400 MHz, Chloroform-*d*) δ 7.86 (d, *J* = 8.4 Hz, 2H), 7.34 (d, *J* = 8.2 Hz, 2H), 7.25 (s, 1H), 2.97 (hept, *J* = 7.0 Hz, 1H), 1.27 (d, *J* = 6.9 Hz, 6H). <sup>13</sup>C NMR (101 MHz, Chloroform-*d*) δ 186.4, 155.6, 134.9, 134.9, 129.0, 127.1, 124.4, 34.5, 23.7. HRMS (ESI) calcd for C<sub>12</sub>H<sub>13</sub>Cl<sub>2</sub>O<sup>+</sup> [M+H]<sup>+</sup> 243.0338, found 243.0332.

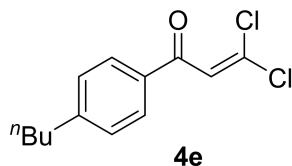

1-(4-butylphenyl)-3,3-dichloroprop-2-en-1-one (**4e**)

Purified by silica gel chromatography (petroleum), the desired product **4e** was obtained as a colorless oil. Yield: 36.1 mg (70%). <sup>1</sup>H NMR (400 MHz, Chloroform-*d*) δ 7.84 (d, *J* = 8.4 Hz, 2H), 7.31 – 7.26 (m, 2H), 7.25 (s, 1H), 2.71 – 2.64 (m, 2H), 1.62 (p, *J* = 7.5 Hz, 2H), 1.36 (h, *J* = 7.3 Hz, 2H), 0.93 (t, *J* = 7.4 Hz, 3H). <sup>13</sup>C NMR (101 MHz, Chloroform-*d*) δ 186.4, 149.8, 134.9, 134.7, 129.0, 128.8, 124.4, 35.9, 33.3, 22.4, 14.0. HRMS (ESI) calcd for C<sub>13</sub>H<sub>15</sub>Cl<sub>2</sub>O<sup>+</sup> [M+H]<sup>+</sup> 257.0494, found 254.0498.

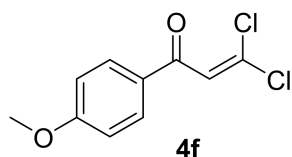

3,3-dichloro-1-(4-methoxyphenyl)prop-2-en-1-one (**4f**)<sup>[2]</sup>

Purified by silica gel chromatography (petroleum), the desired product **4f** was obtained as a colorless oil. Yield: 37.6 mg (81%). <sup>1</sup>H NMR (400 MHz, Chloroform-*d*) δ 7.90 (d, *J* = 9.0 Hz, 2H), 7.20 (s, 1H), 6.95 (d, *J* = 8.9 Hz, 2H), 3.87 (s, 3H). <sup>13</sup>C NMR (101 MHz, Chloroform-*d*) δ 185.5, 164.2, 131.1, 129.9, 124.5, 114.2, 55.7.

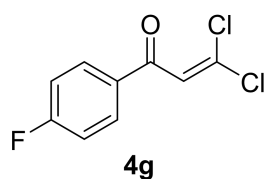

3,3-dichloro-1-(4-fluorophenyl)prop-2-en-1-one (**4g**)<sup>[2]</sup>

Purified by silica gel chromatography (petroleum), the desired product **4g** was obtained as a yellow oil. Yield: 15.2 mg (35%). <sup>1</sup>H NMR (400 MHz, Chloroform-*d*) δ 7.96 (dd, *J* = 8.9, 5.3 Hz, 2H), 7.24 (s, 1H), 7.17 (t, *J* = 8.6 Hz, 2H). <sup>13</sup>C NMR (101 MHz, Chloroform-*d*) δ 185.3, 167.5, 165.0, 135.9, 133.4 (d, *J* = 3.0 Hz), 131.4 (d, *J* = 9.5 Hz), 123.9, 116.2 (d, *J* = 22.0 Hz). <sup>19</sup>F NMR (376 MHz, Chloroform-*d*) δ -103.6.

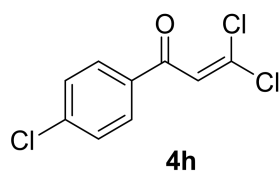

3,3-dichloro-1-(4-chlorophenyl)prop-2-en-1-one (**4h**)<sup>[2]</sup>

Purified by silica gel chromatography (petroleum), the desired product **4h** was obtained as a colorless oil. Yield: 20.3 mg (43%). <sup>1</sup>H NMR (400 MHz, Chloroform-*d*) δ 7.86 (d, *J* = 8.6 Hz, 2H), 7.47 (d, *J* = 8.6 Hz, 2H), 7.22 (s, 1H). <sup>13</sup>C NMR (101 MHz, Chloroform-*d*) δ 185.6, 140.4, 136.4, 135.4, 130.0, 129.4, 123.7.

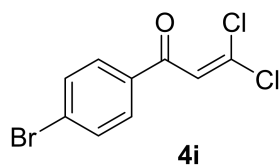

1-(4-bromophenyl)-3,3-dichloroprop-2-en-1-one (**4i**)<sup>[4]</sup>

Purified by silica gel chromatography (petroleum), the desired product **4i** was obtained as a colorless oil. Yield: 19.6 mg (35%). <sup>1</sup>H NMR (400 MHz, Chloroform-*d*) δ 7.80 – 7.76 (m, 2H), 7.66 – 7.61 (m, 2H), 7.21 (s, 1H). <sup>13</sup>C NMR (101 MHz, Chloroform-*d*) δ 185.7, 136.5, 135.8, 132.4, 130.1, 129.2, 123.6.

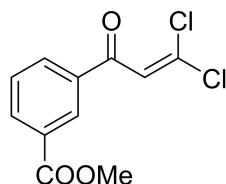

**4j**

methyl 3-(3,3-dichloroacryloyl)benzoate (**4j**)

Purified by silica gel chromatography (petroleum), the desired product **4j** was obtained as a colorless oil. Yield: 21.3 mg (41%). <sup>1</sup>H NMR (400 MHz, Chloroform-*d*) δ 8.53 (t, *J* = 1.8 Hz, 1H), 8.26 (dt, *J* = 7.7, 1.4 Hz, 1H), 8.13 (dt, *J* = 7.7, 1.4 Hz, 1H), 7.59 (t, *J* = 7.9 Hz, 1H), 7.32 (s, 1H), 3.96 (s, 3H). <sup>13</sup>C NMR (101 MHz, Chloroform-*d*) δ 185.8, 166.2, 137.4, 136.9, 134.5, 132.7, 131.1, 129., 129.3, 123.6, 52.6.

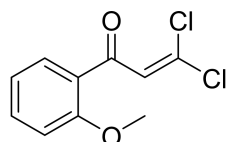

**4k**

3,3-dichloro-1-(2-methoxyphenyl)prop-2-en-1-one (**4k**)

Purified by silica gel chromatography (petroleum), the desired product **4k** was obtained as a colorless oil. Yield: 37.8 mg (82%). <sup>1</sup>H NMR (400 MHz, Chloroform-*d*) δ 7.69 (dd, *J* = 7.7, 1.8 Hz, 1H), 7.49 (ddd, *J* = 8.4, 7.4, 1.9 Hz, 1H), 7.31 (s, 1H), 7.03 (dd, *J* = 7.5, 1.0 Hz, 1H), 6.96 (dd, *J* = 8.4, 1.0 Hz, 1H), 3.91 (s, 3H). <sup>13</sup>C NMR (101 MHz, Chloroform-*d*) δ 187.4, 158.6, 134.4, 133.8, 131.1, 128.1, 128.0, 121.1, 111.8, 55.9. HRMS (ESI) calcd for C<sub>10</sub>H<sub>9</sub>Cl<sub>2</sub>O<sub>2</sub><sup>+</sup> [M+H]<sup>+</sup> 230.9974, found 230.9971.

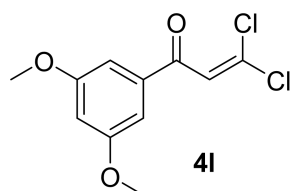

**4l**

3,3-dichloro-1-(3,5-dimethoxyphenyl)prop-2-en-1-one (**4l**)



Purified by silica gel chromatography (petroleum), the desired product **4l** was obtained as a colorless oil. Yield: 23.4 mg (45%). M.P. 36-37°C. <sup>1</sup>H NMR (400 MHz, Chloroform-*d*) δ 7.21 (s, 1H), 7.03 (d, *J* = 2.3 Hz, 2H), 6.67 (t, *J* = 2.3 Hz, 1H), 3.83 (s, 6H). <sup>13</sup>C NMR (101 MHz, Chloroform-*d*) δ 186.3, 161.2, 139.0, 135.7, 124.2, 106.4, 106.1, 55.8. HRMS (ESI) calcd for C<sub>11</sub>H<sub>11</sub>Cl<sub>2</sub>O<sub>3</sub><sup>+</sup> [M+H]<sup>+</sup> 261.0080, found 261.0076.

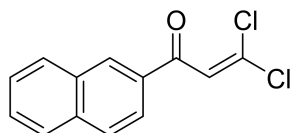

**4m**

### 3,3-dichloro-1-(naphthalen-2-yl)prop-2-en-1-one (**4m**)

Purified by silica gel chromatography (petroleum), the desired product **4m** was obtained as a colorless oil. Yield: 18.1 mg (36%). M.P. 51-53°C. <sup>1</sup>H NMR (400 MHz, Chloroform-*d*) δ 8.42 – 8.39 (m, 1H), 8.03 – 7.96 (m, 2H), 7.94 – 7.87 (m, 2H), 7.60 (dddd, *J* = 21.6, 8.2, 6.8, 1.4 Hz, 2H), 7.41 (s, 1H). <sup>13</sup>C NMR (101 MHz, Chloroform-*d*) δ 186.7, 136.0, 135.5, 134.4, 132.6, 130.7, 129.8, 129.1, 129.0, 128.0, 127.2, 124.4, 124.0. HRMS (ESI) calcd for C<sub>13</sub>H<sub>9</sub>Cl<sub>2</sub>O<sup>+</sup> [M+H]<sup>+</sup> 251.0025, found 251.0022.

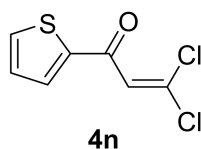

**4n**

### 3,3-dichloro-1-(thiophen-2-yl)prop-2-en-1-one (**4n**)<sup>[2]</sup>

Purified by silica gel chromatography (petroleum), the desired product **4n** was obtained as a colorless solid. Yield: 4.2 mg (10%). <sup>1</sup>H NMR (400 MHz, Chloroform-*d*) δ 7.73 – 7.70 (m, 2H), 7.23 (s, 1H), 7.17 (dd, *J* = 4.9, 3.9 Hz, 1H). <sup>13</sup>C NMR (101 MHz, Chloroform-*d*) δ 178.5, 144.8, 136.6, 135.2, 132.4, 128.5, 123.3.

## 8. NMR Spectral of $\alpha$ -gem-dihalovinyl ketones

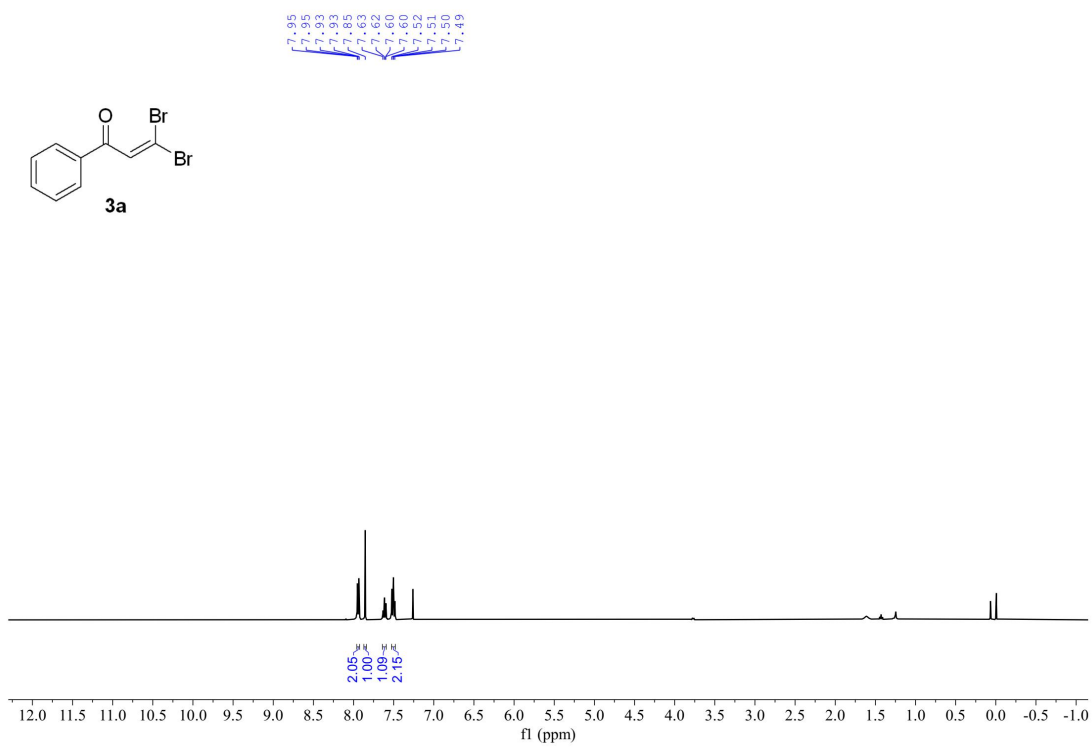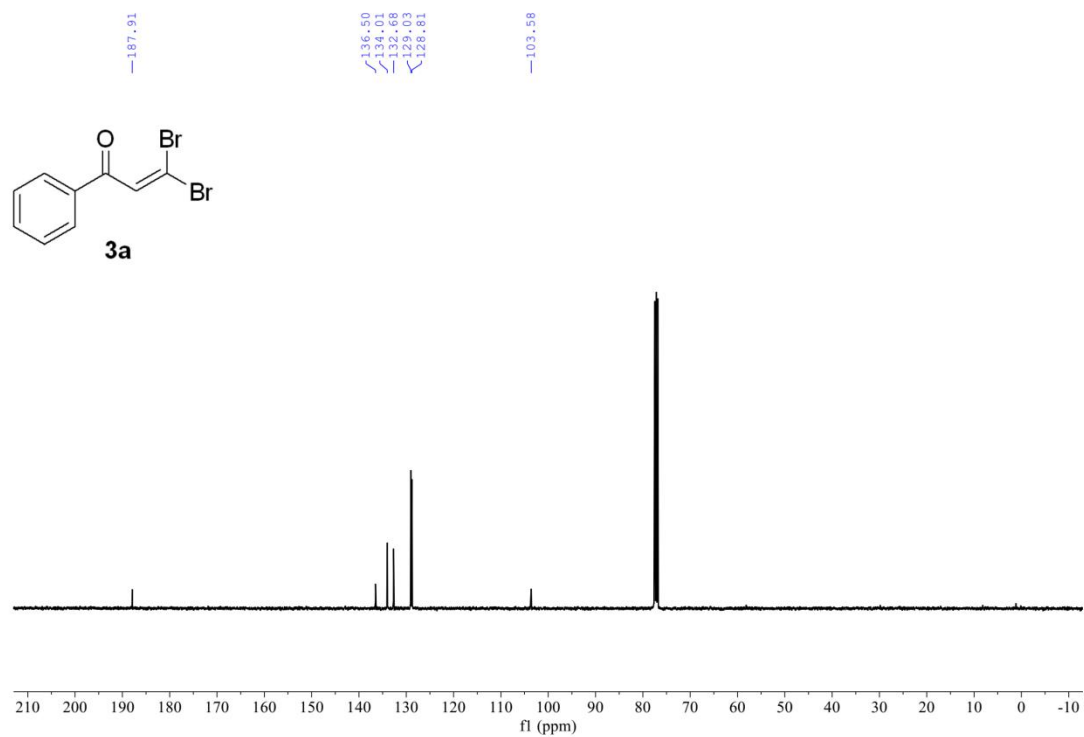

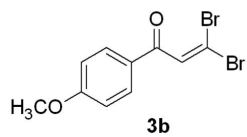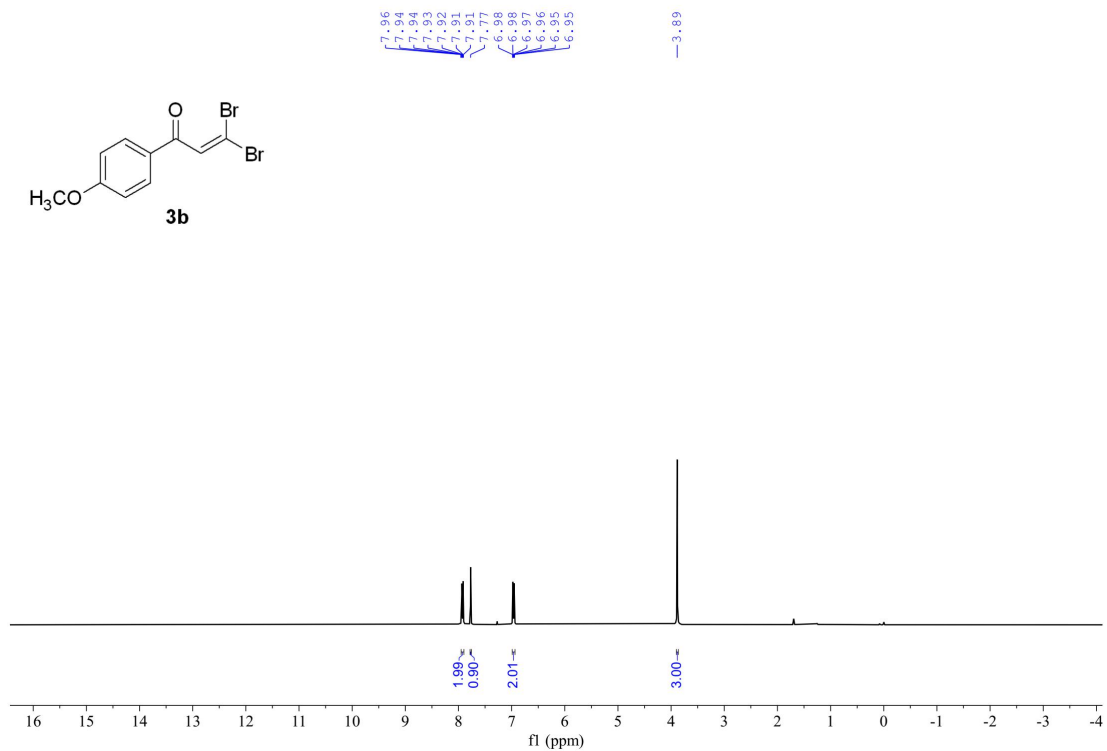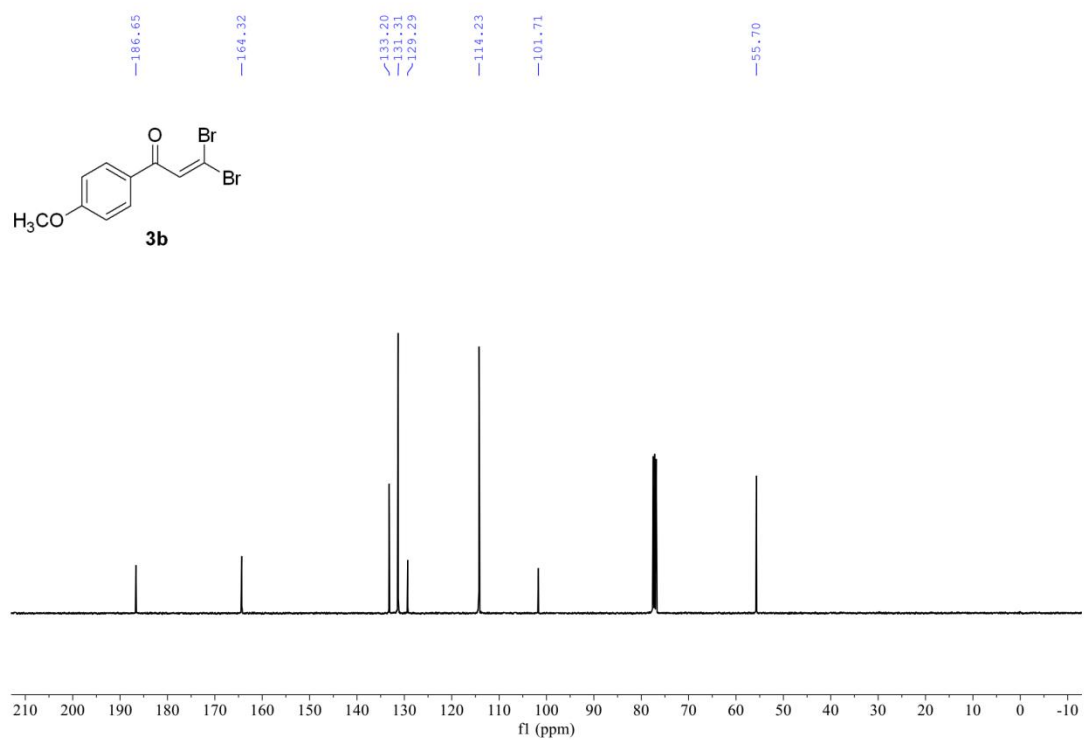

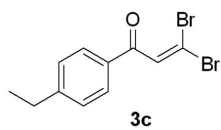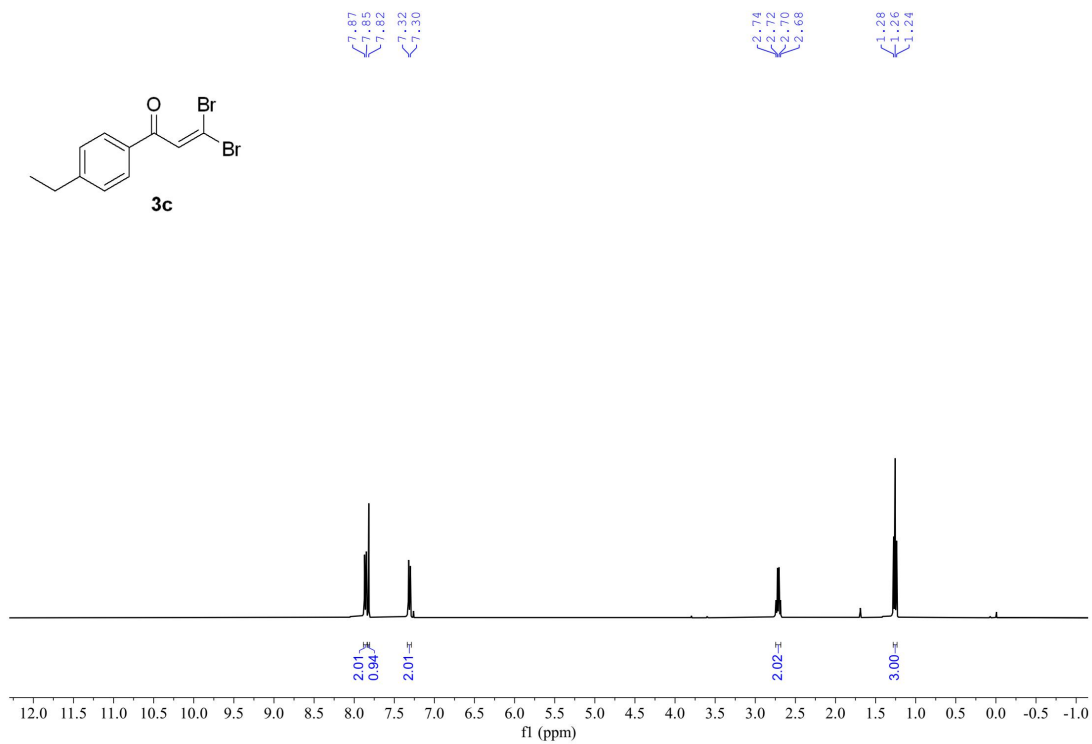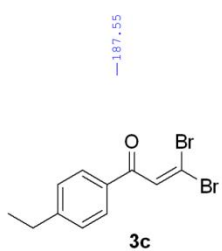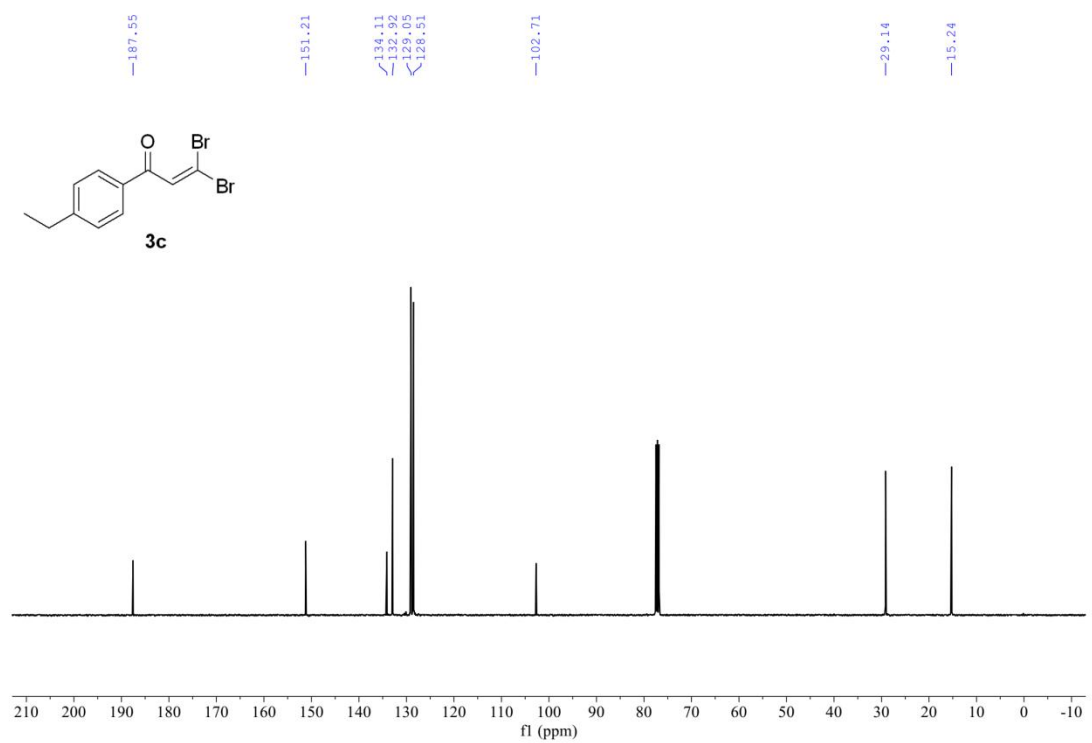

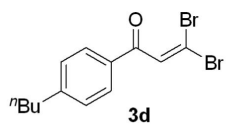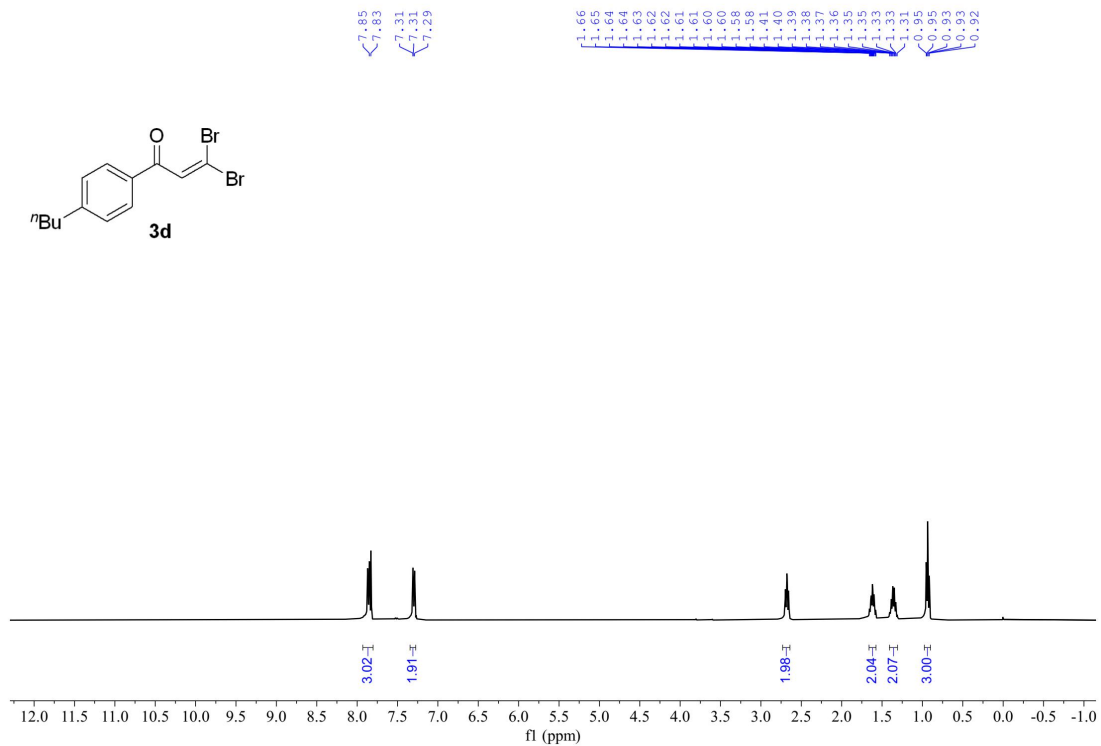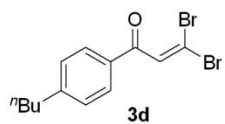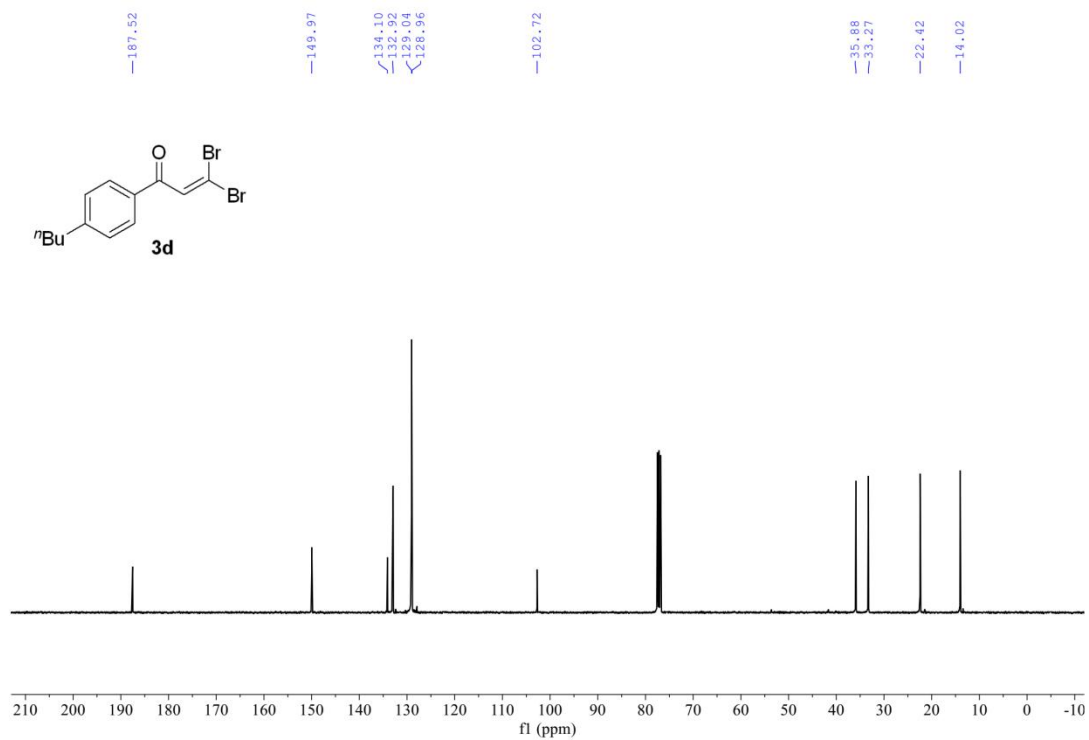

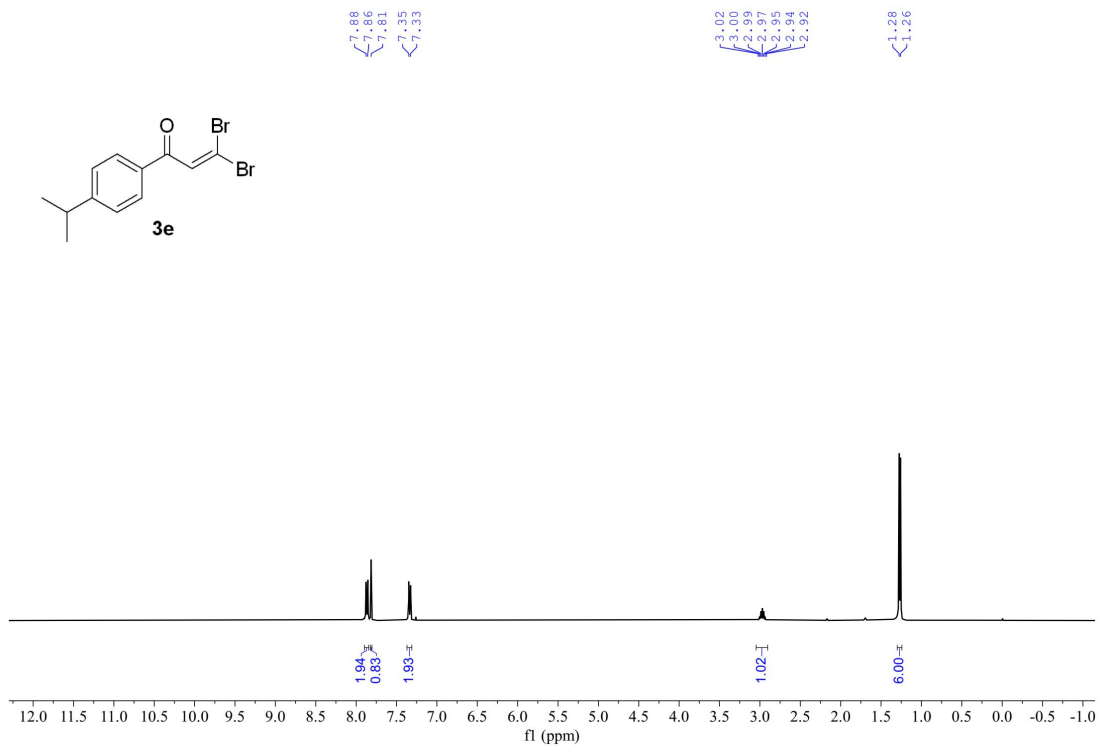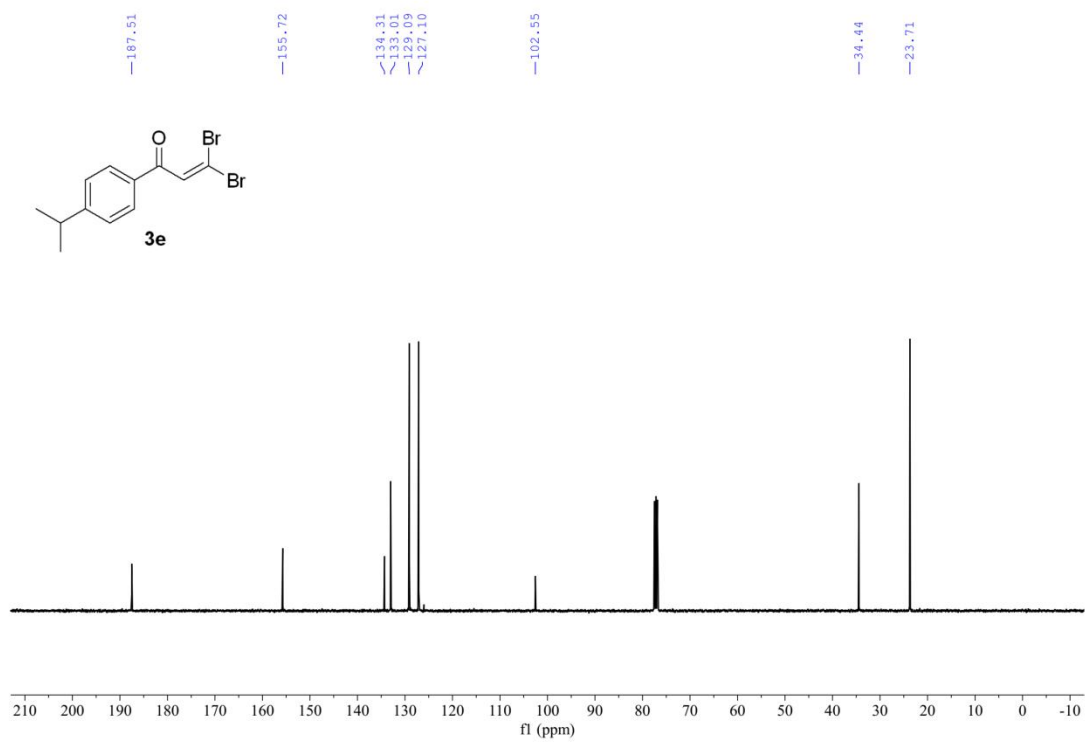

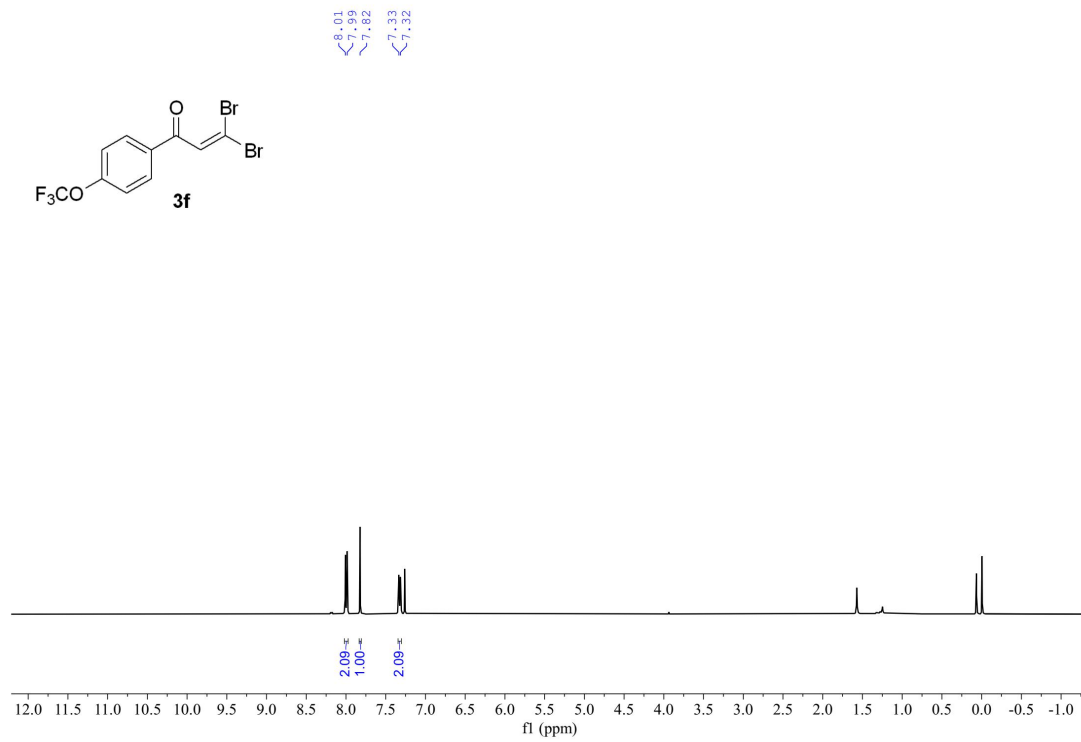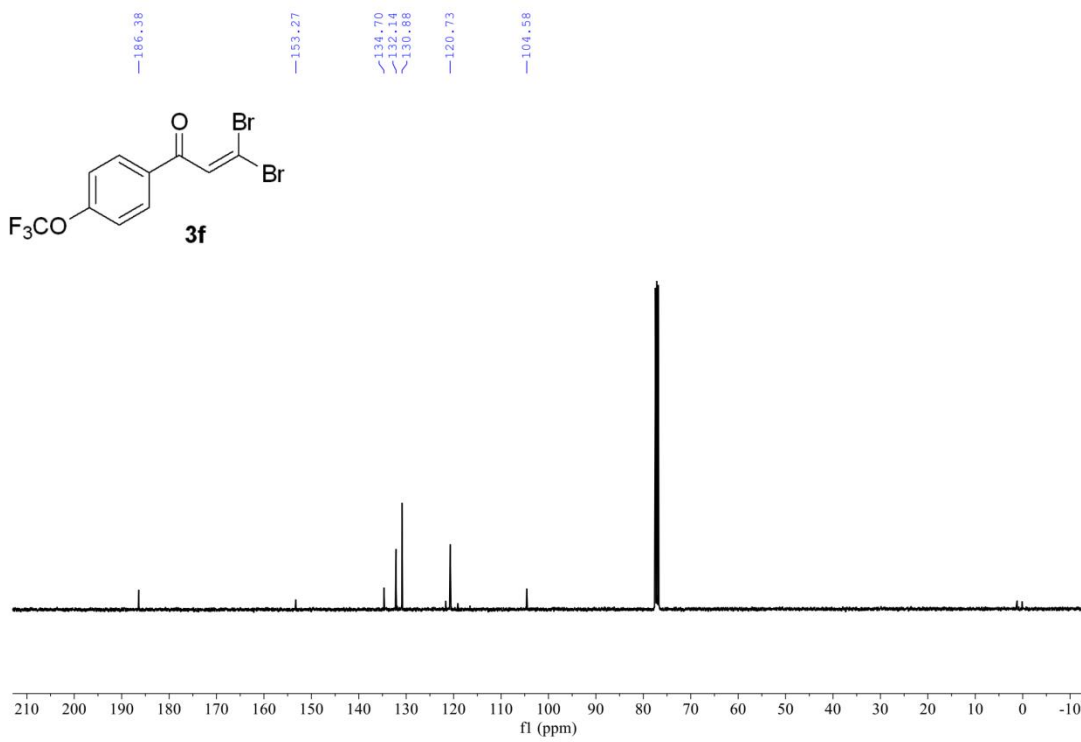

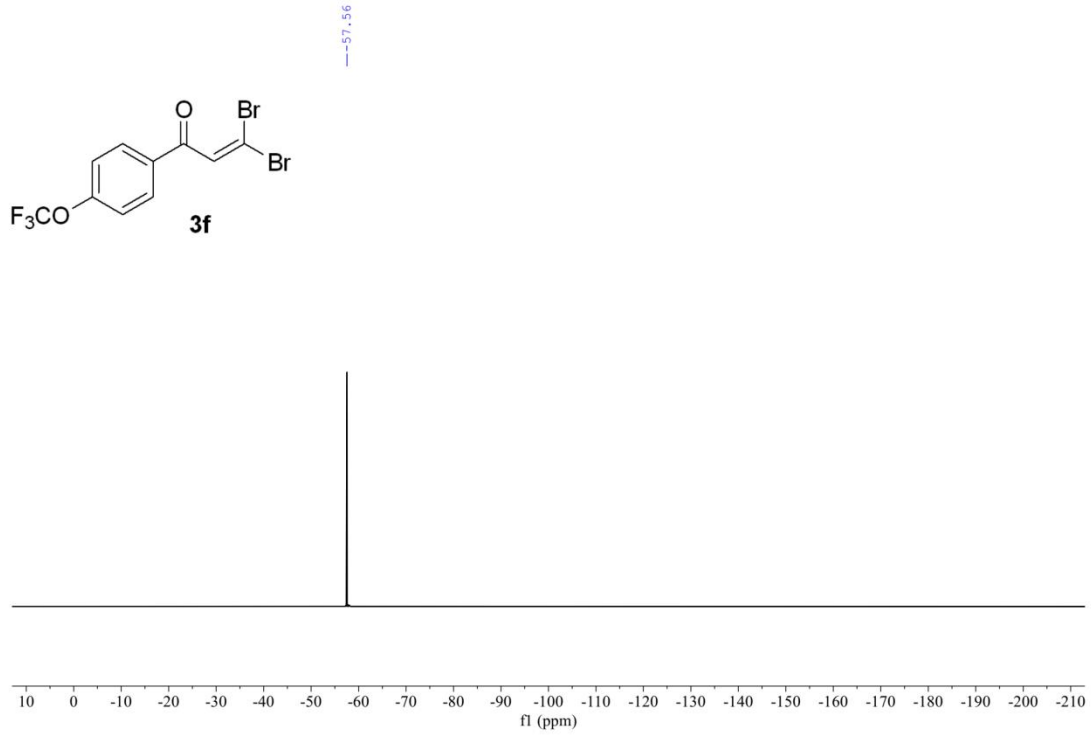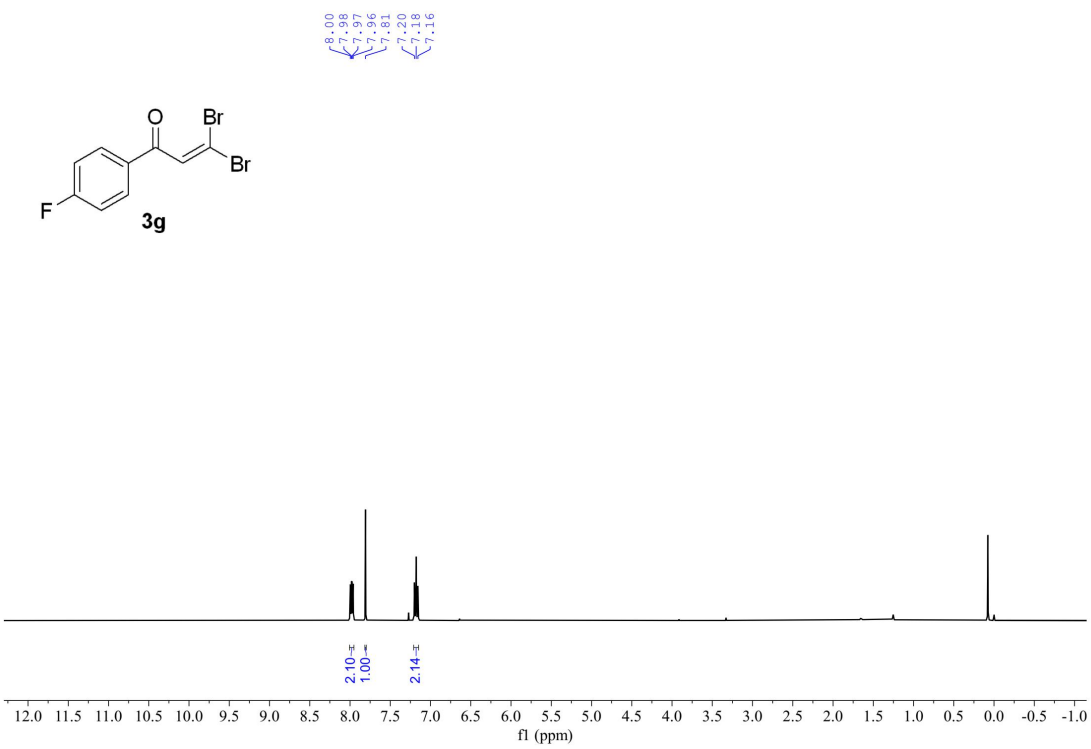



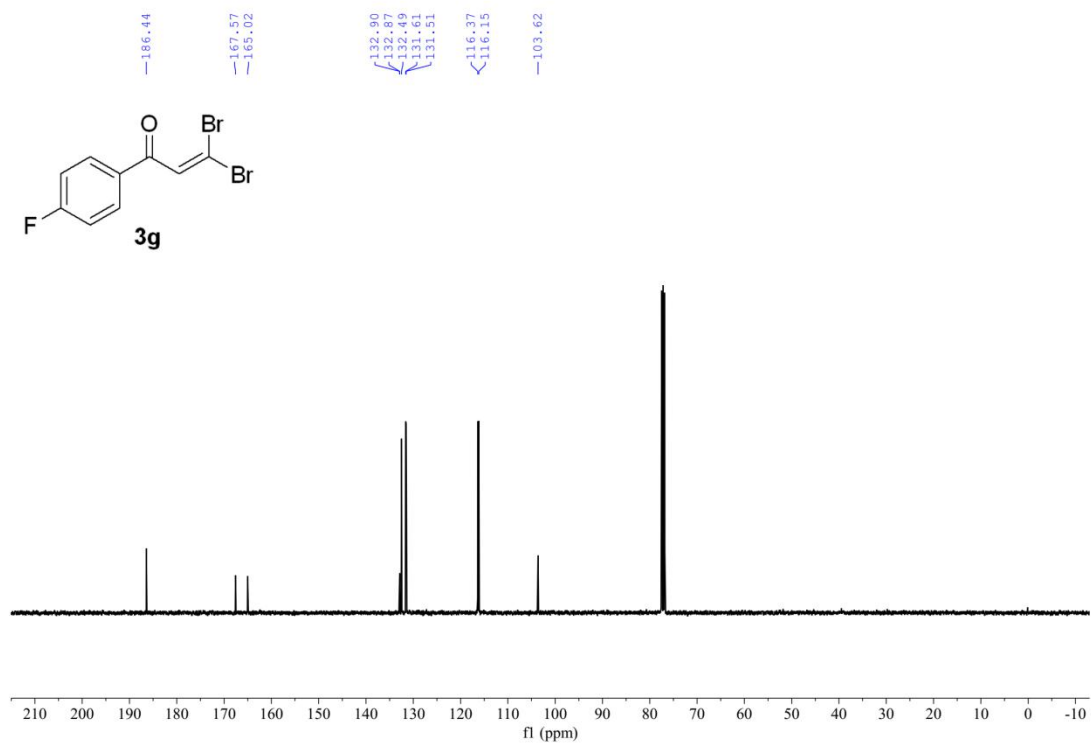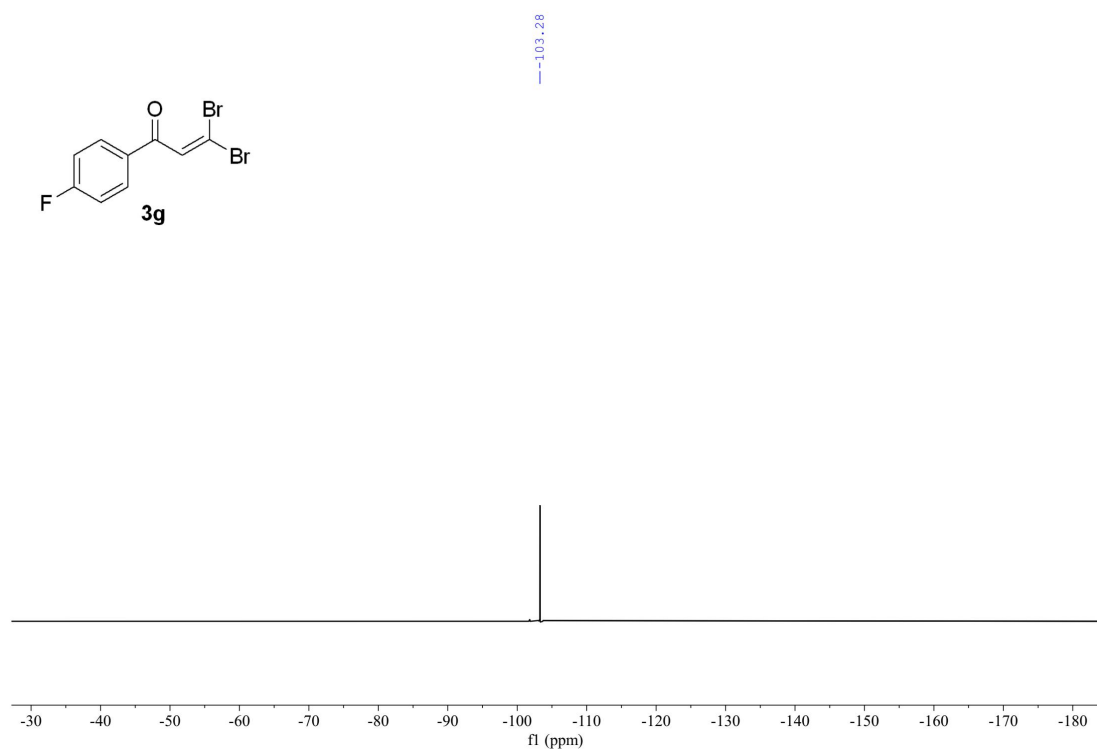

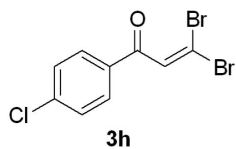

7.89  
7.87  
7.81  
7.78  
7.47

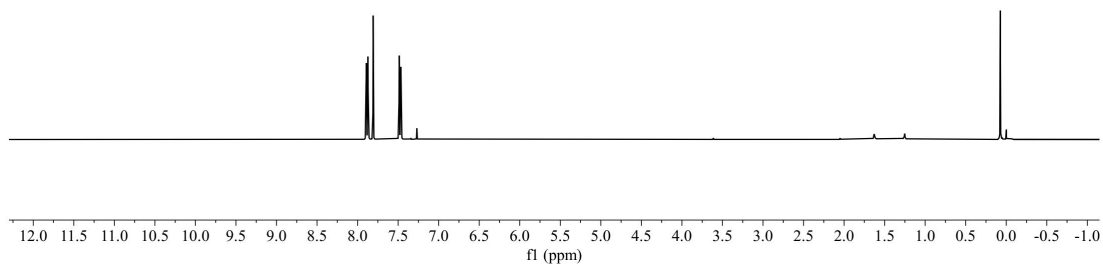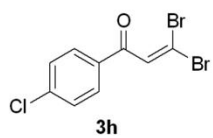

186.68

140.56  
134.85  
132.22  
129.38

104.26

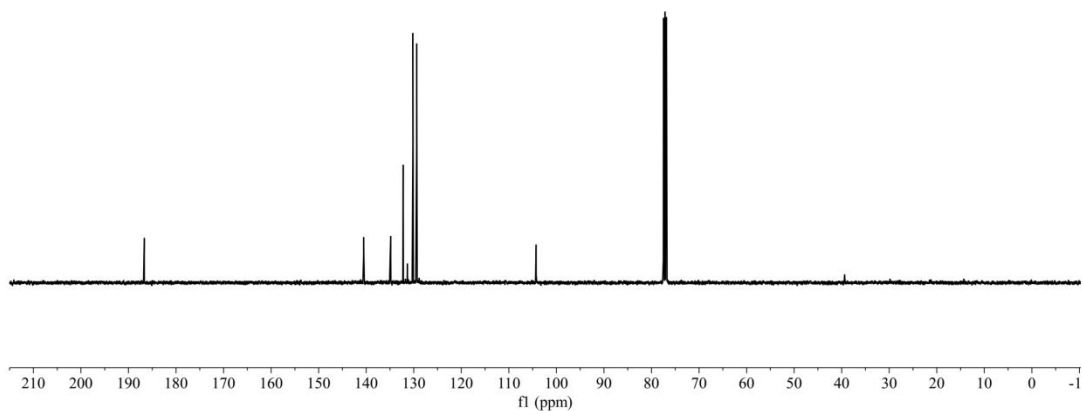

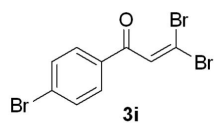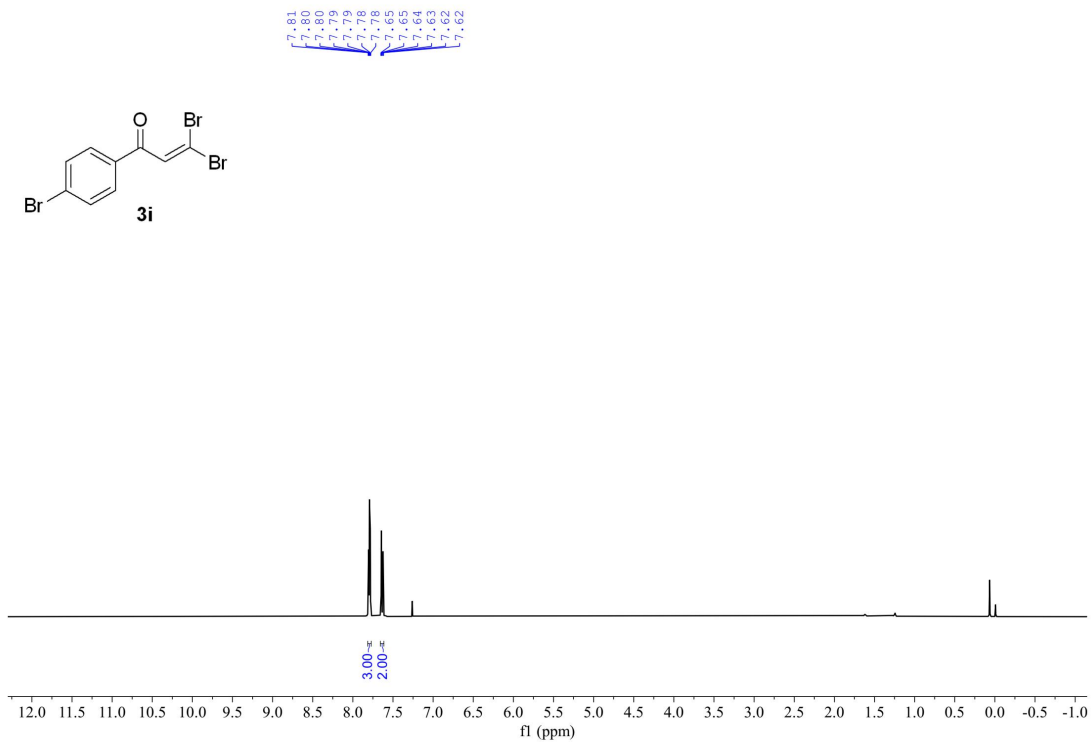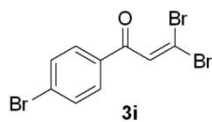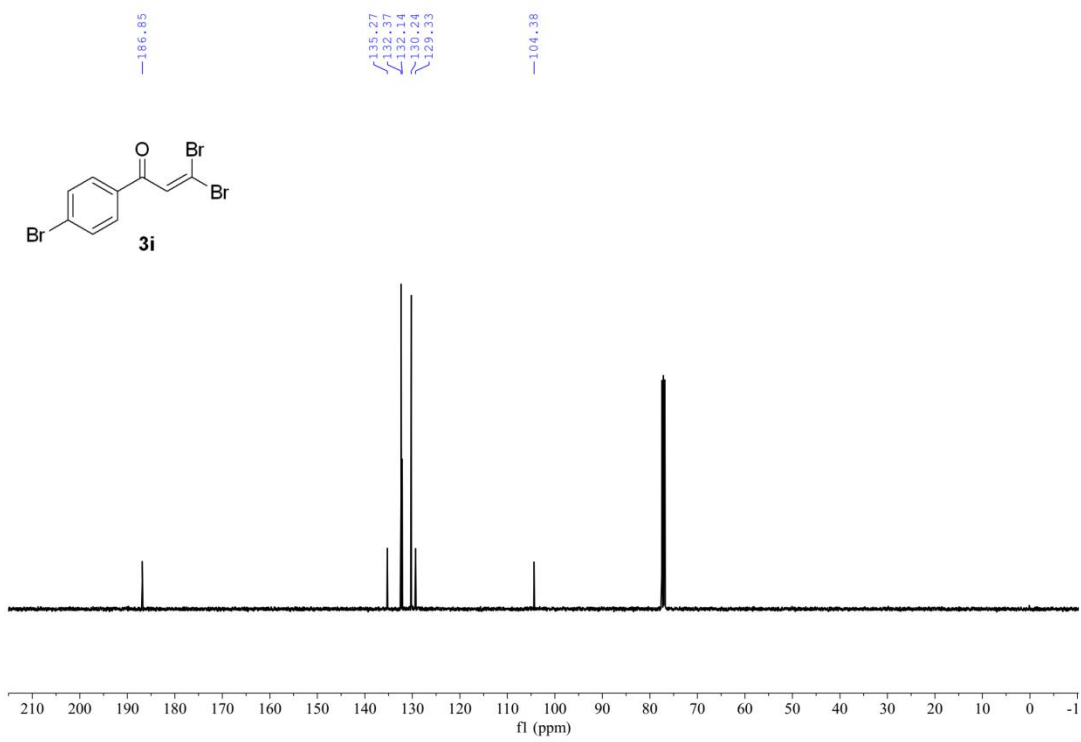

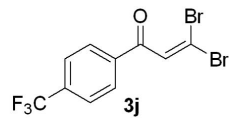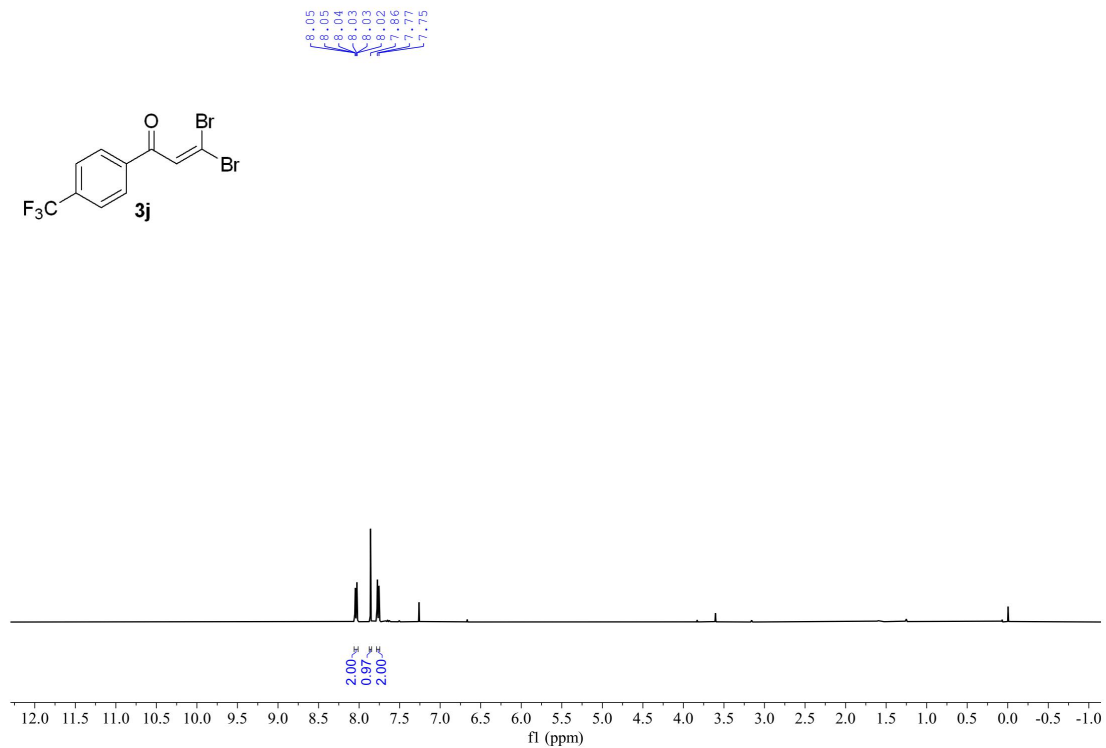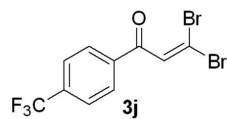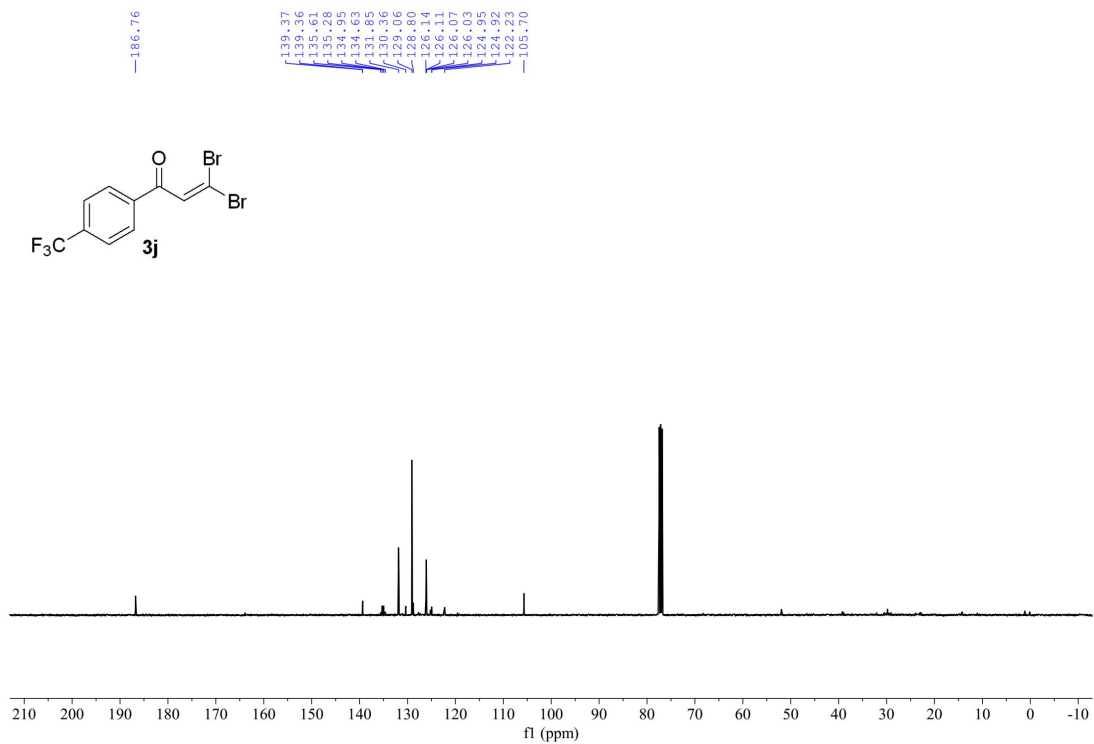

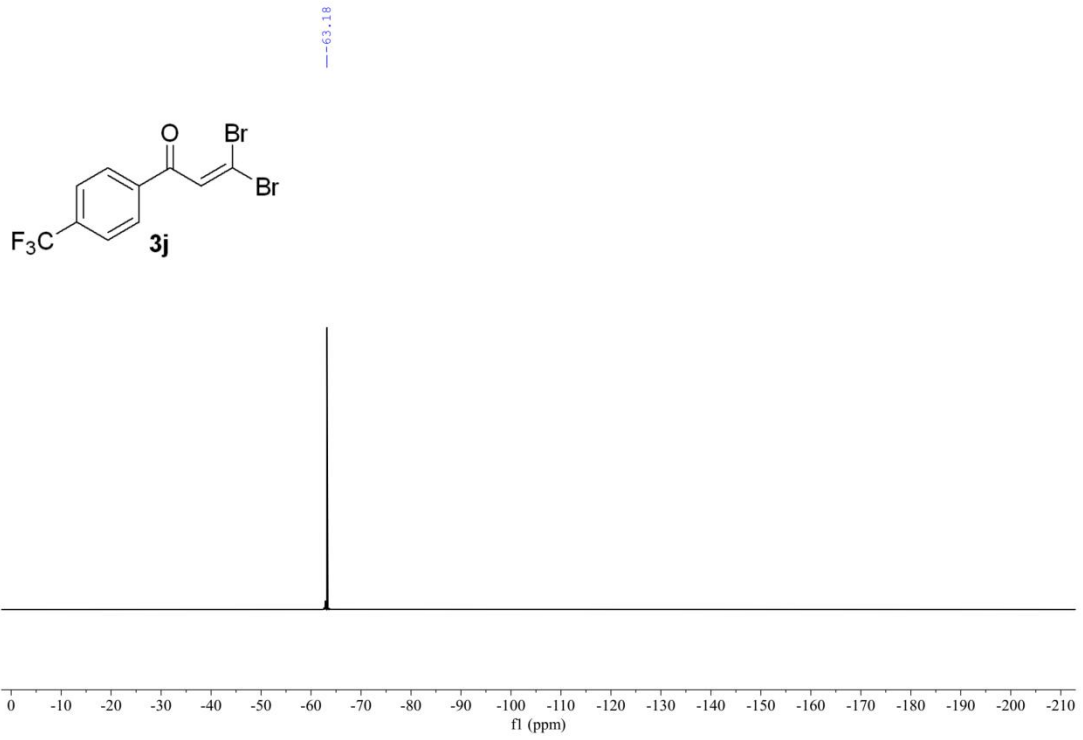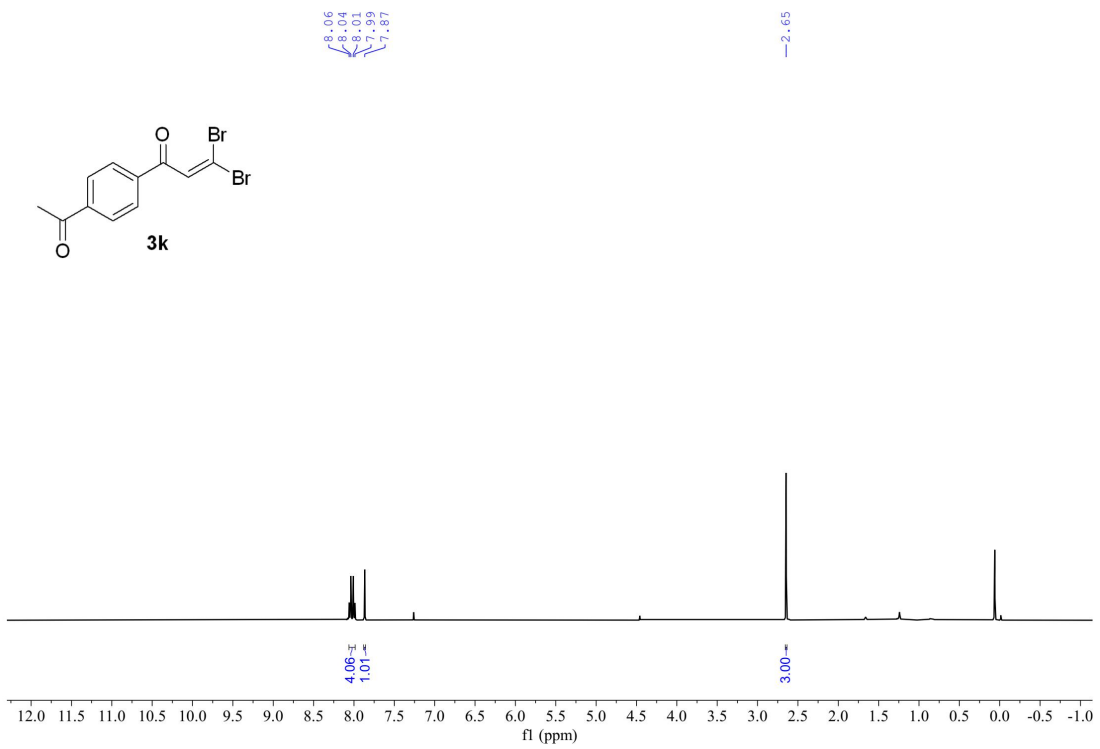

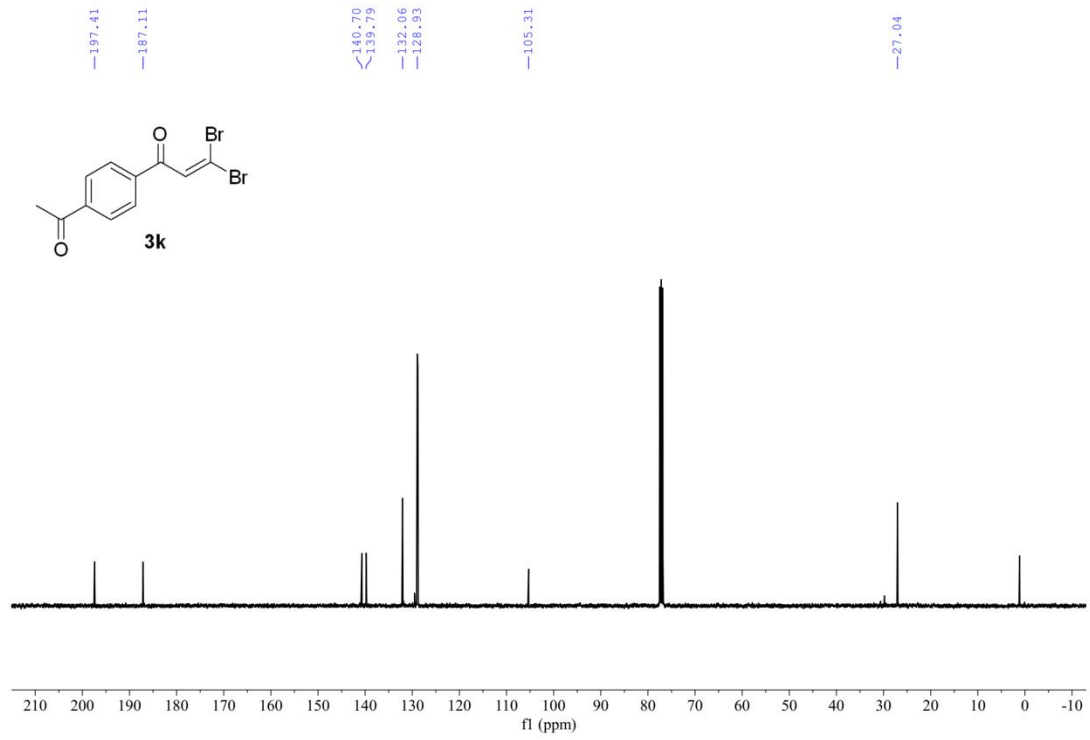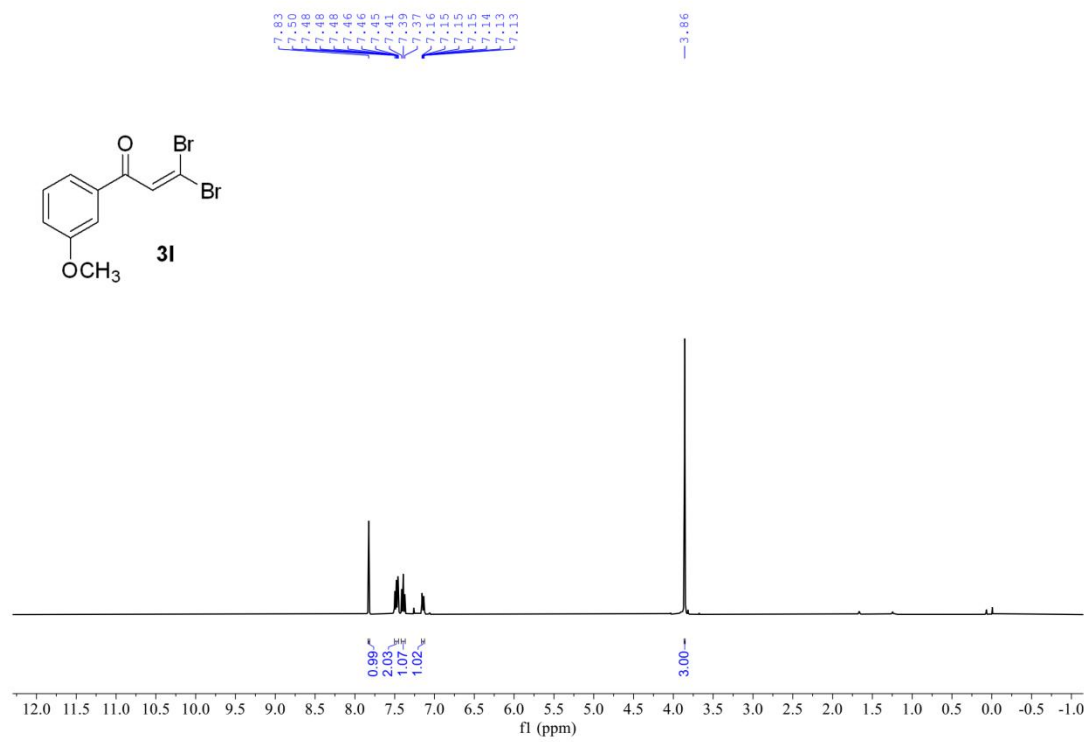

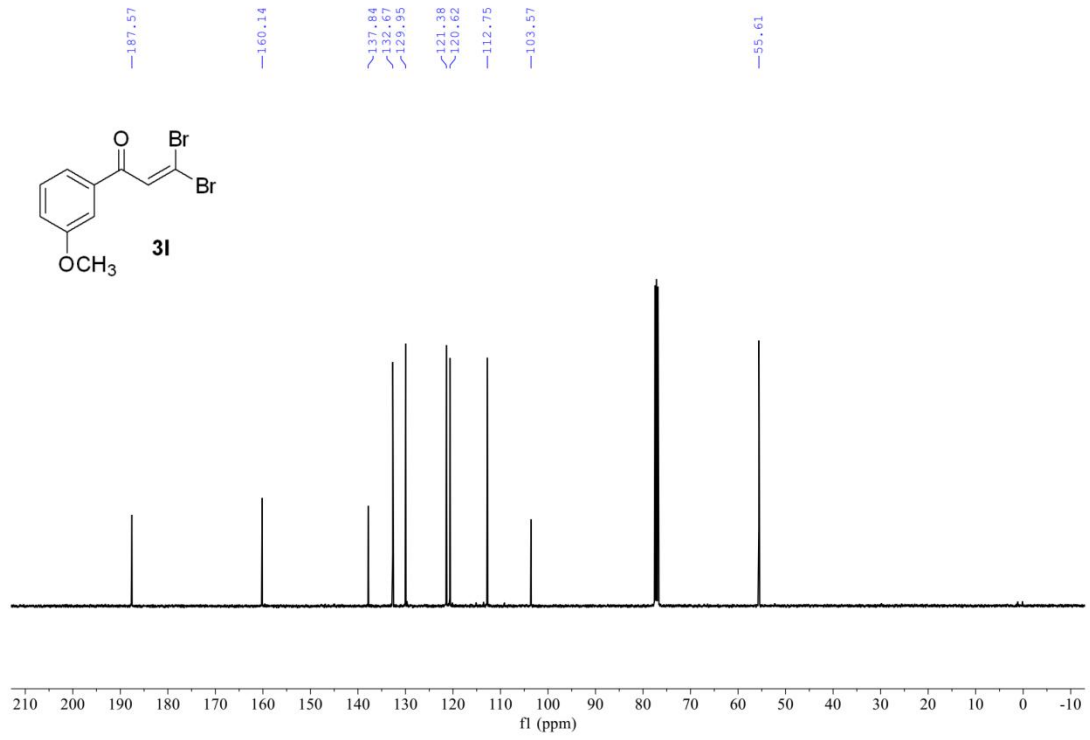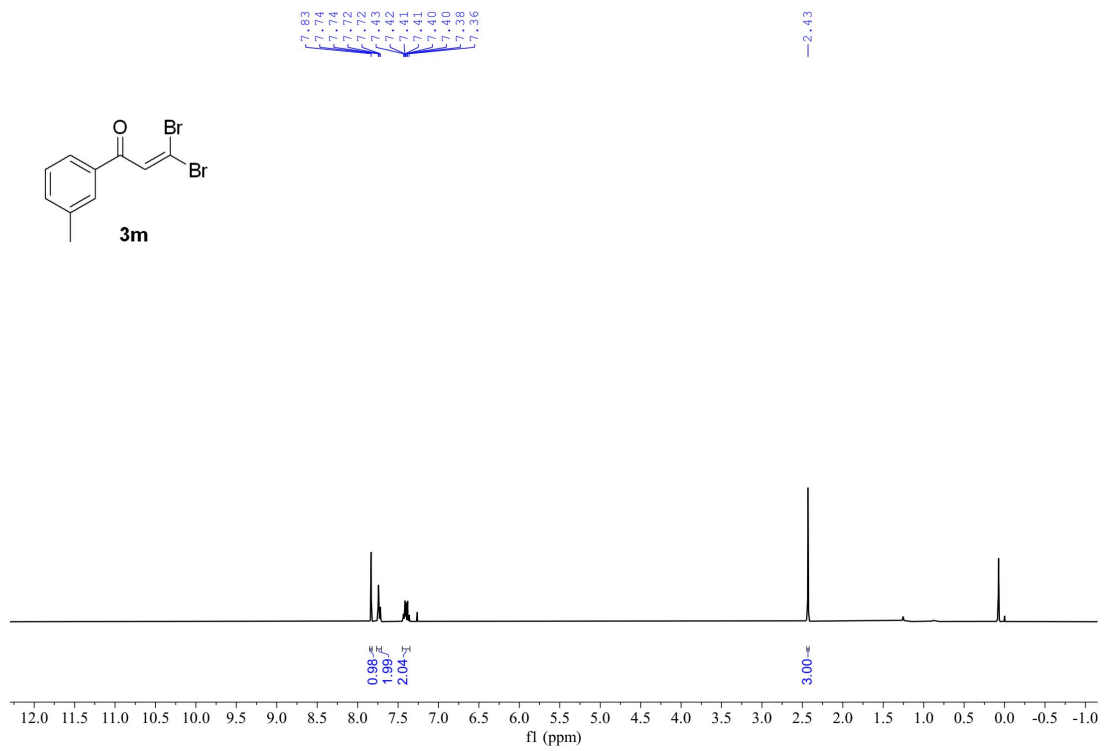

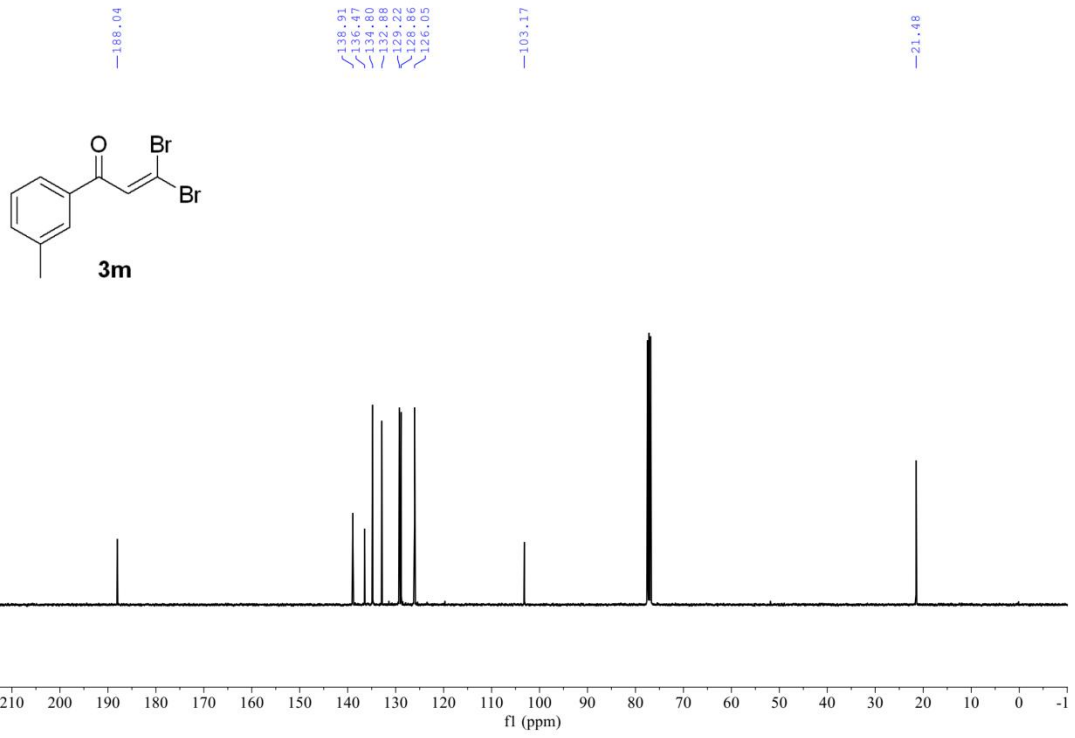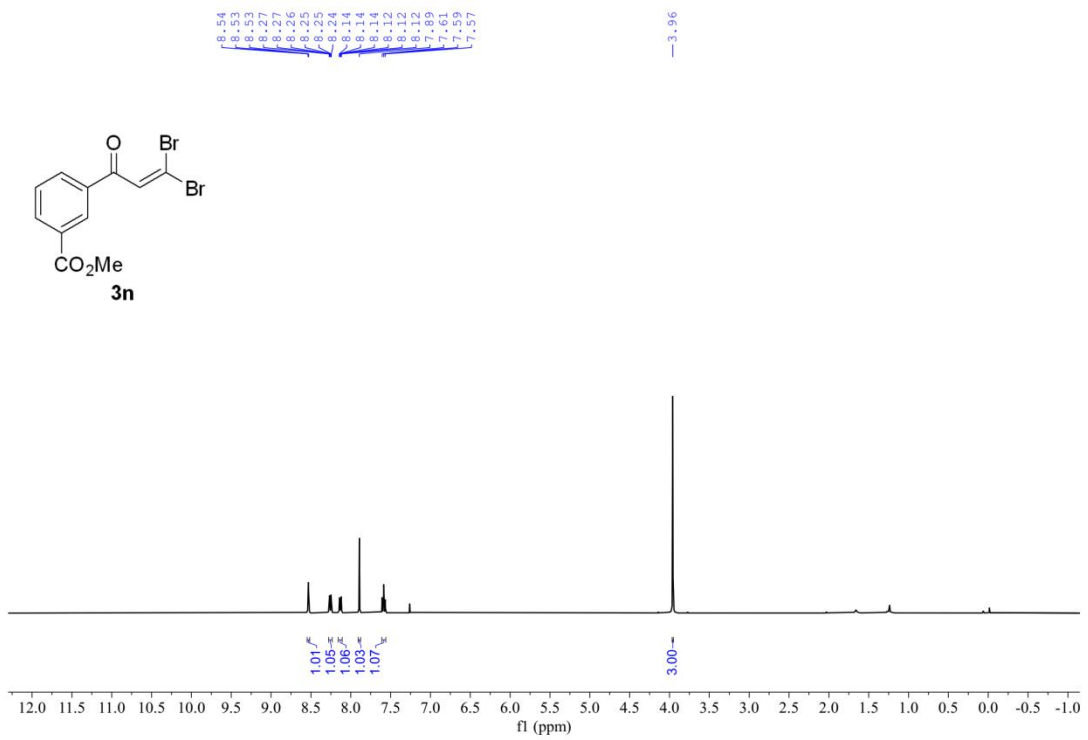



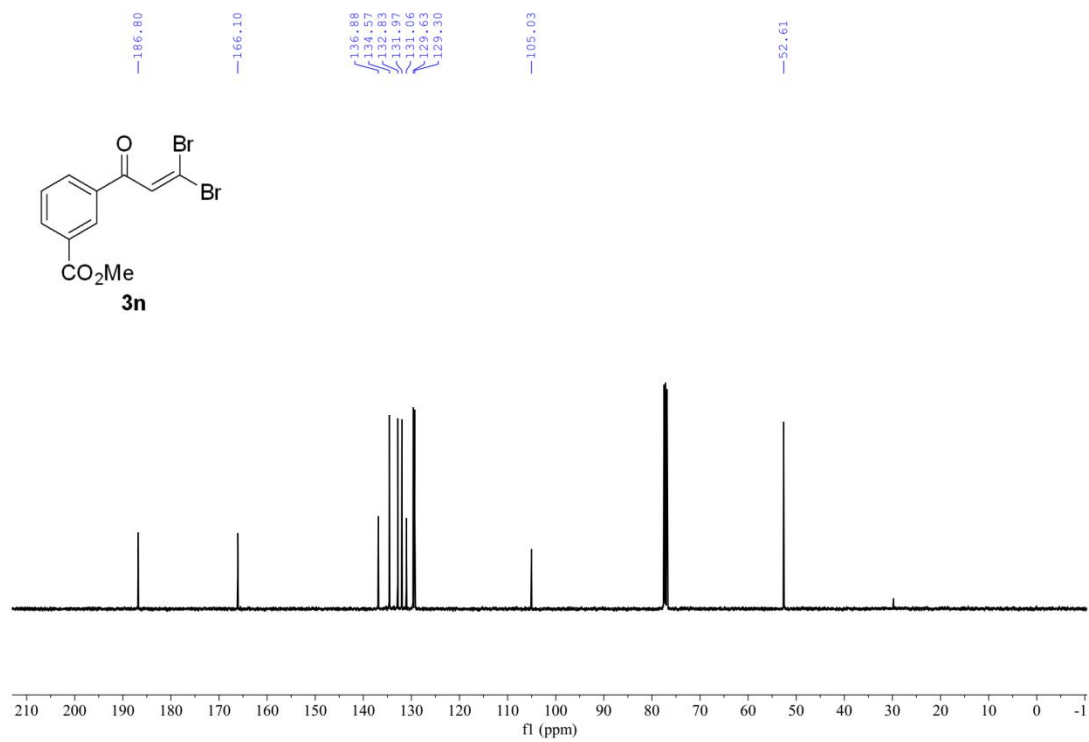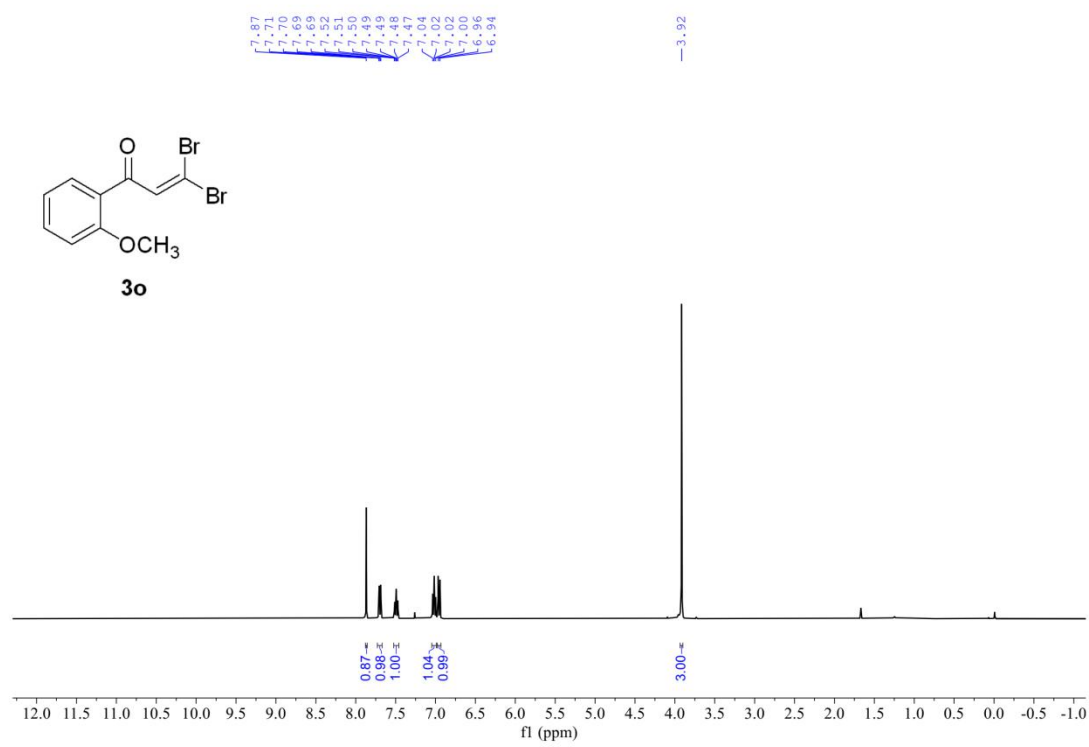

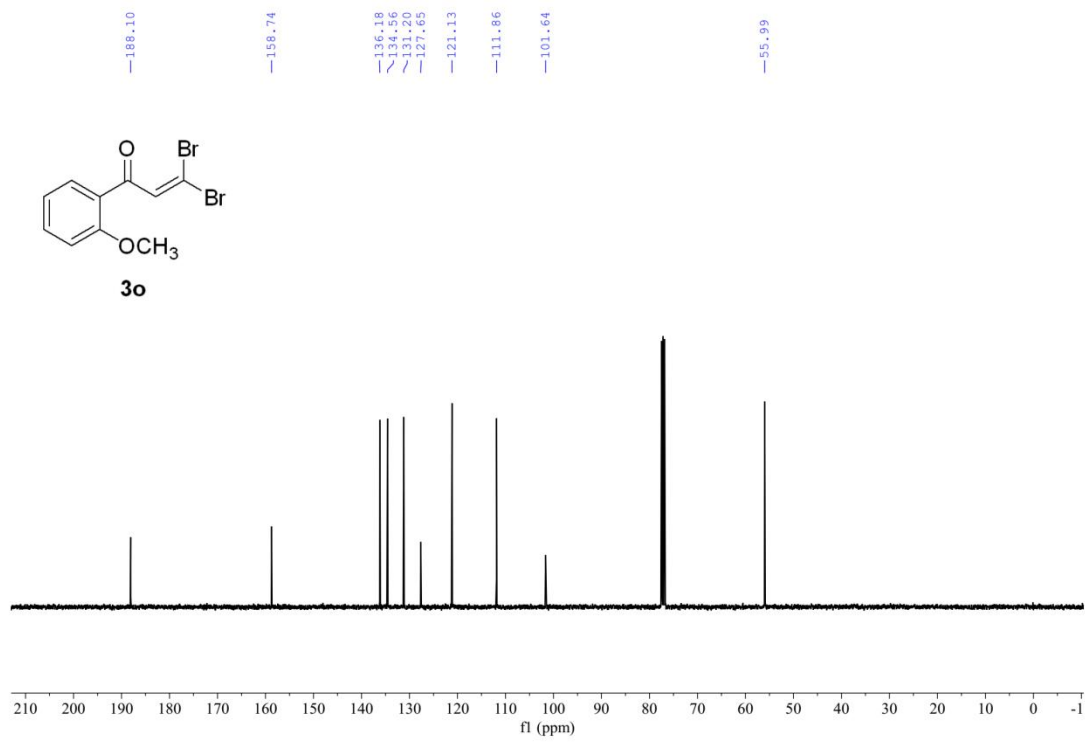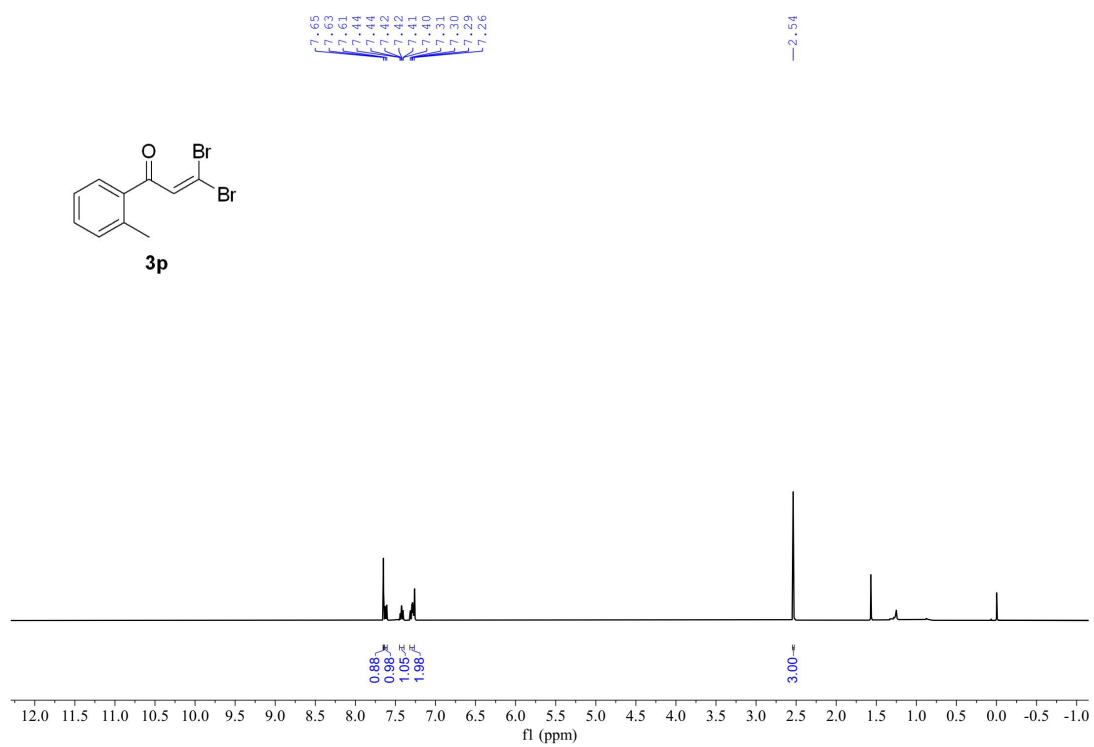

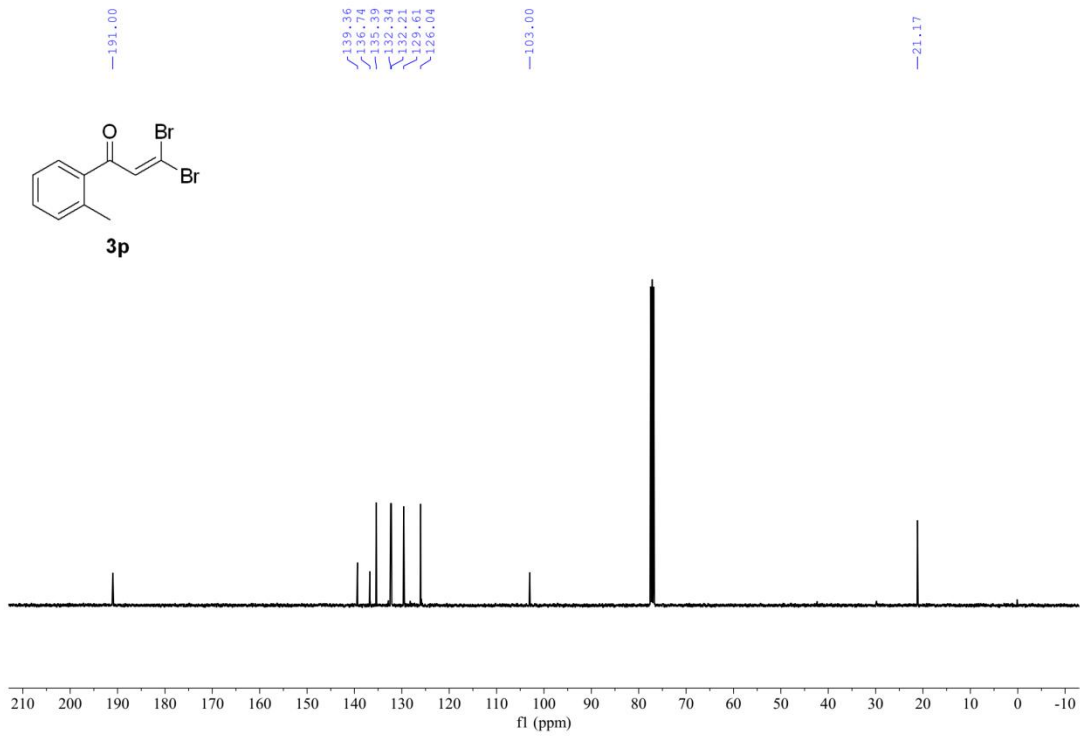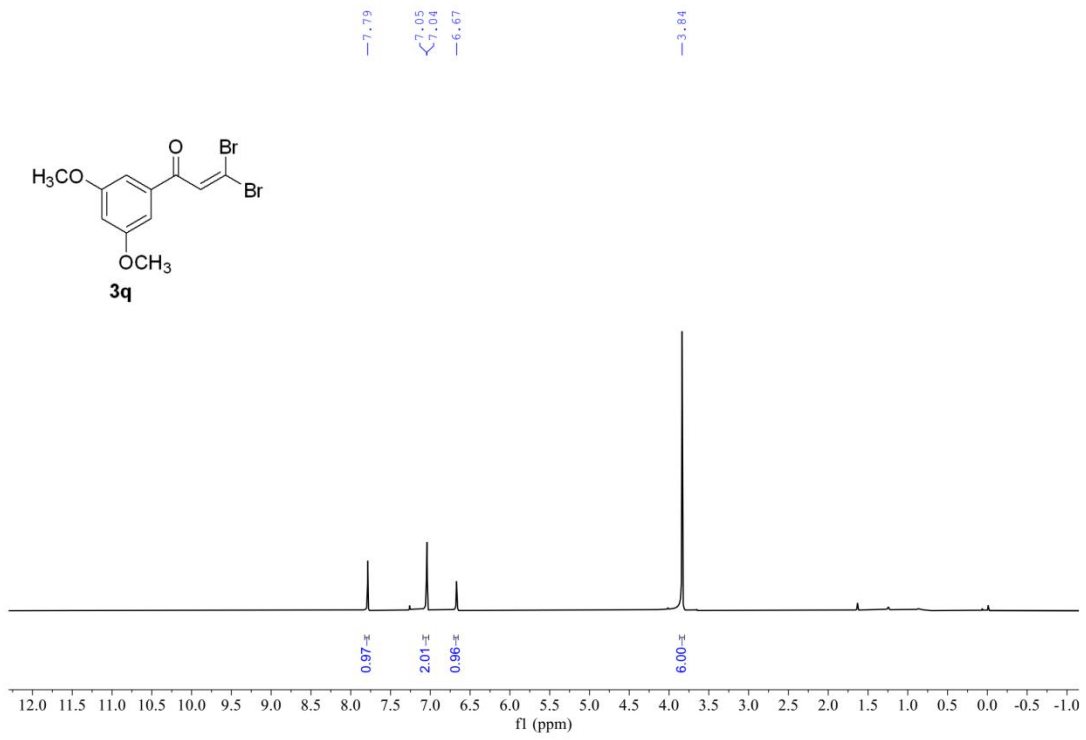

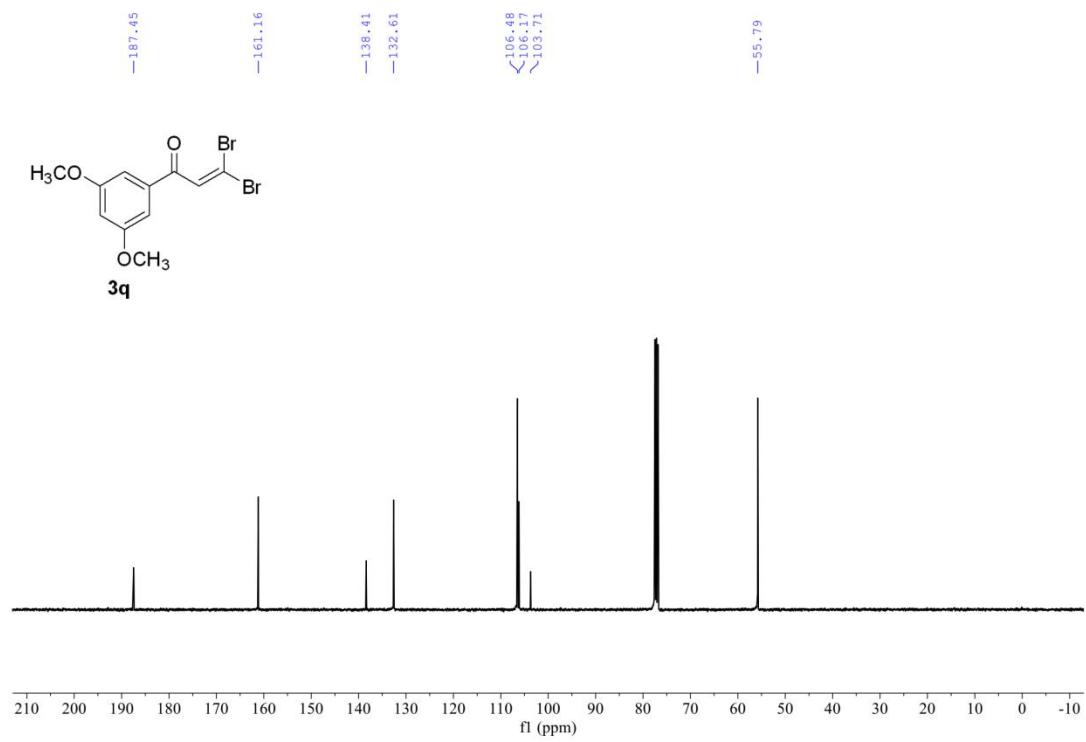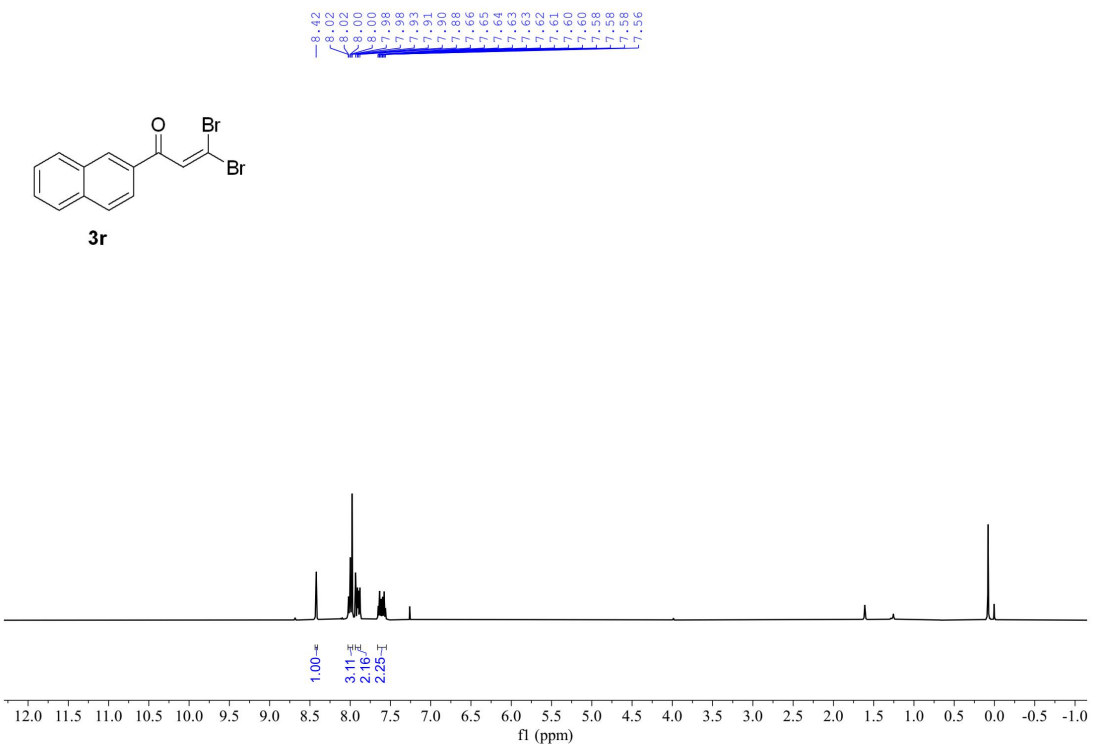

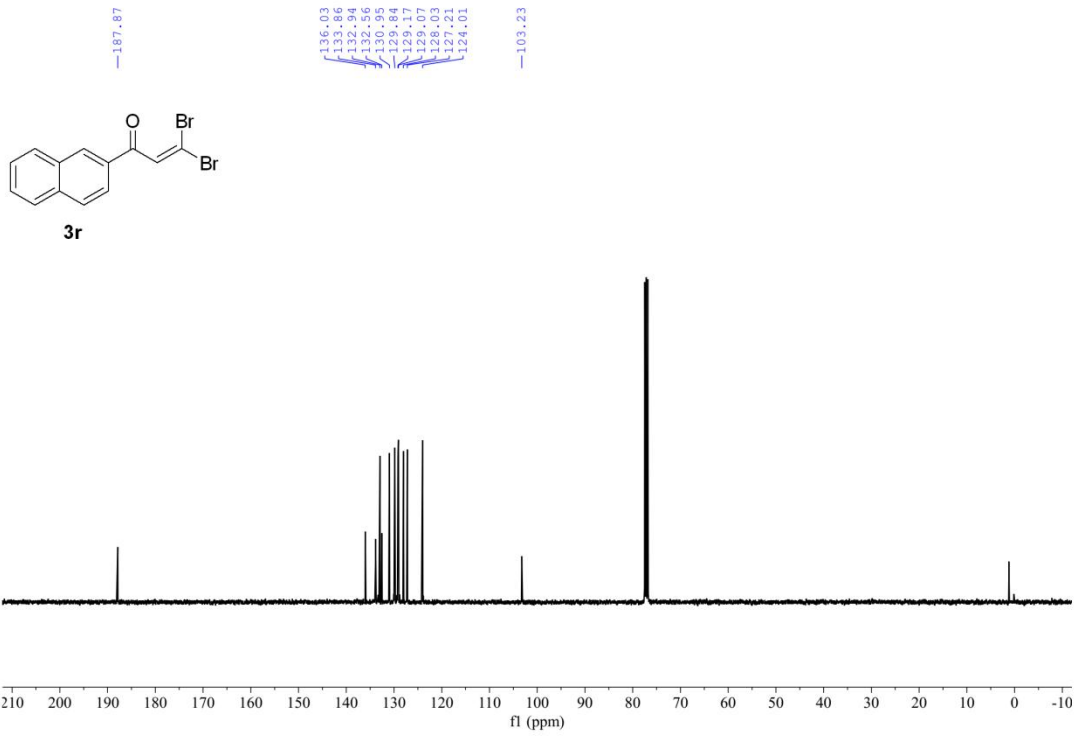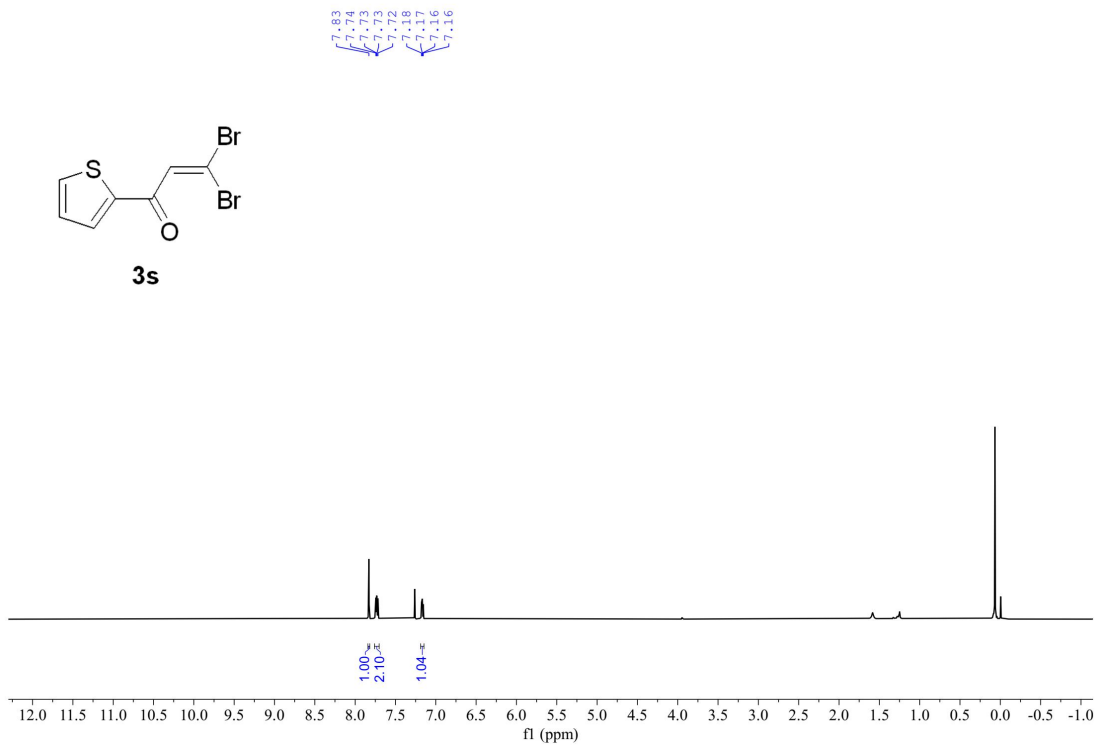

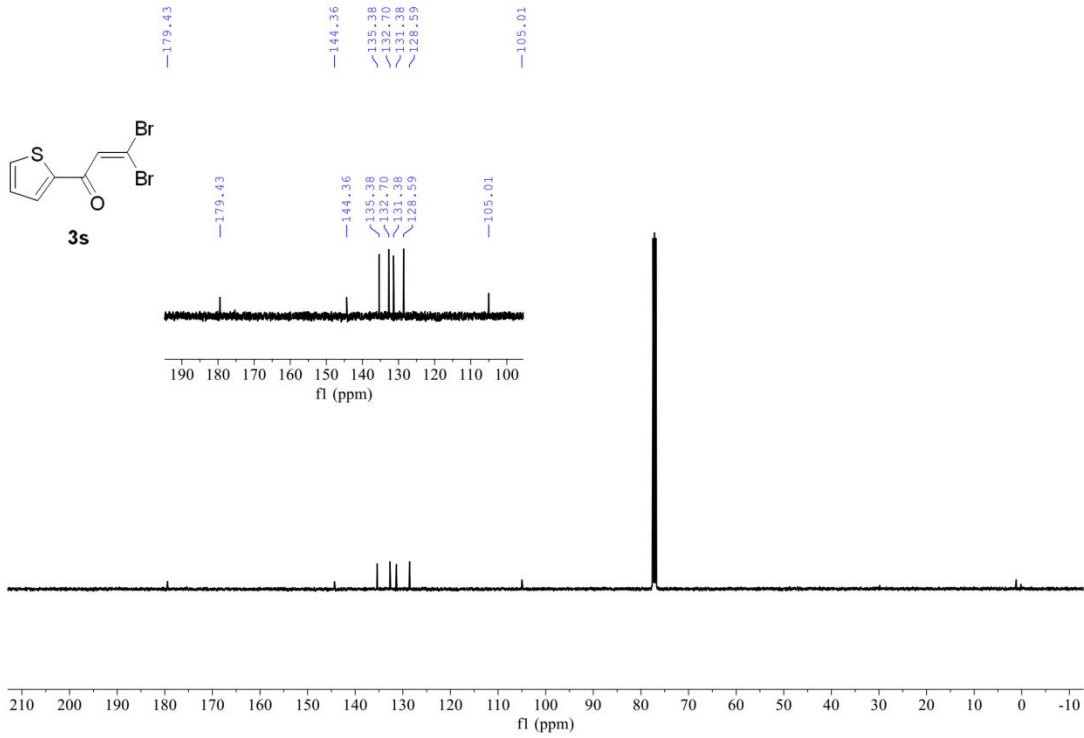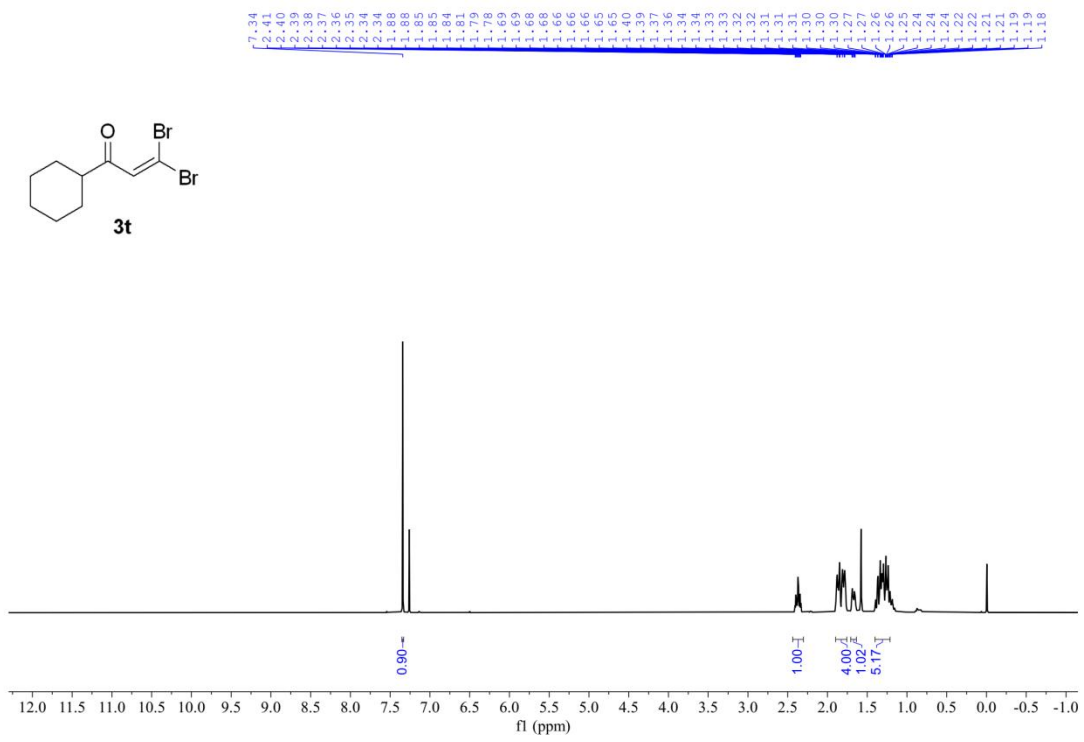

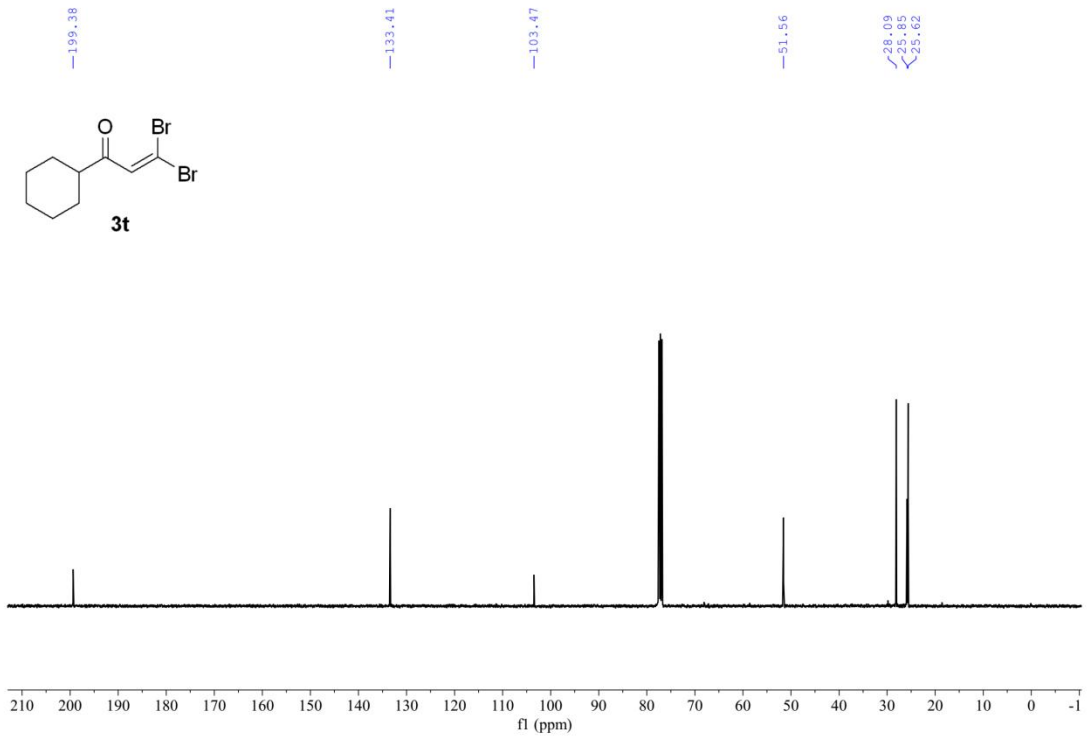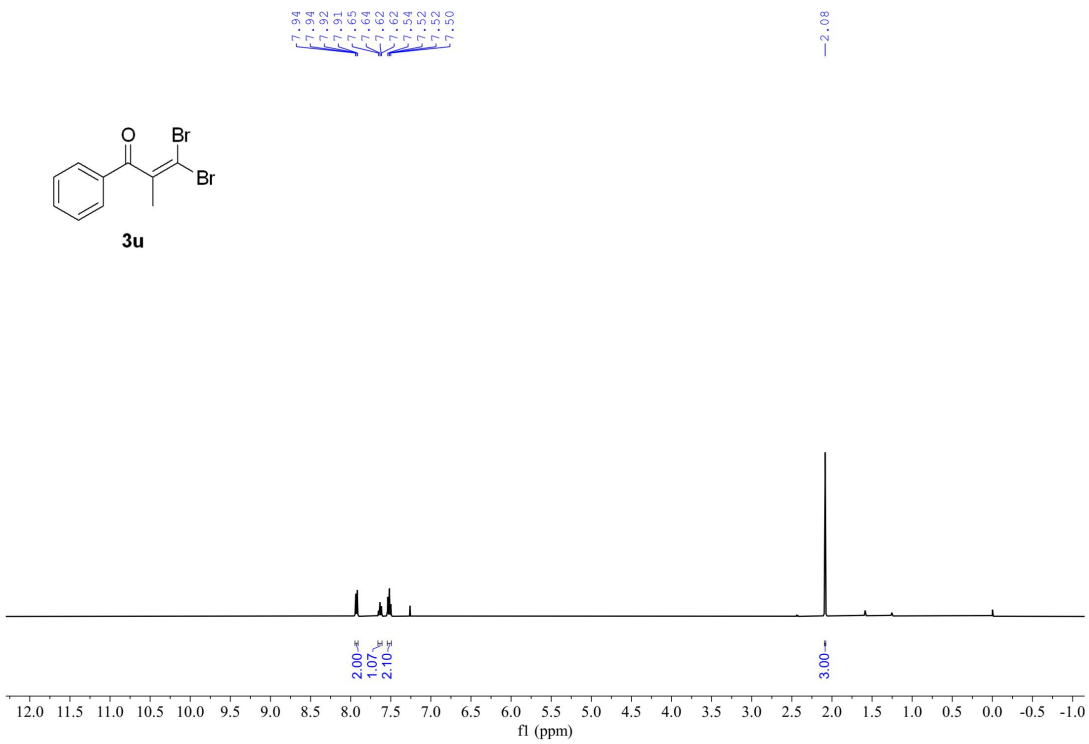

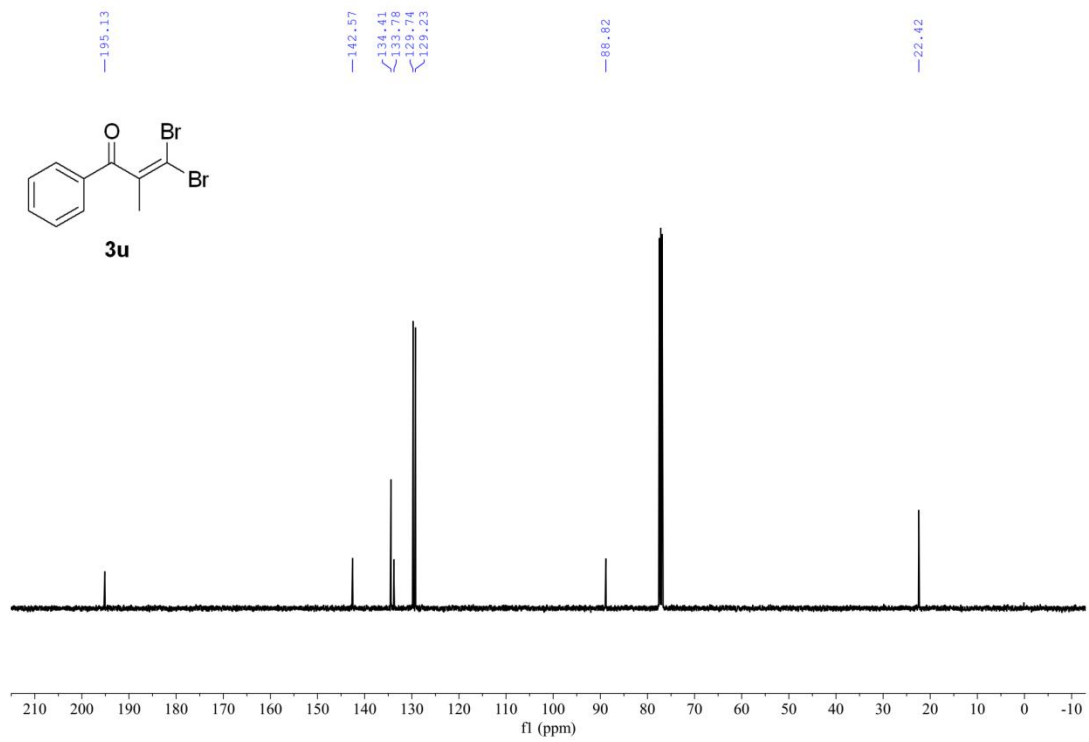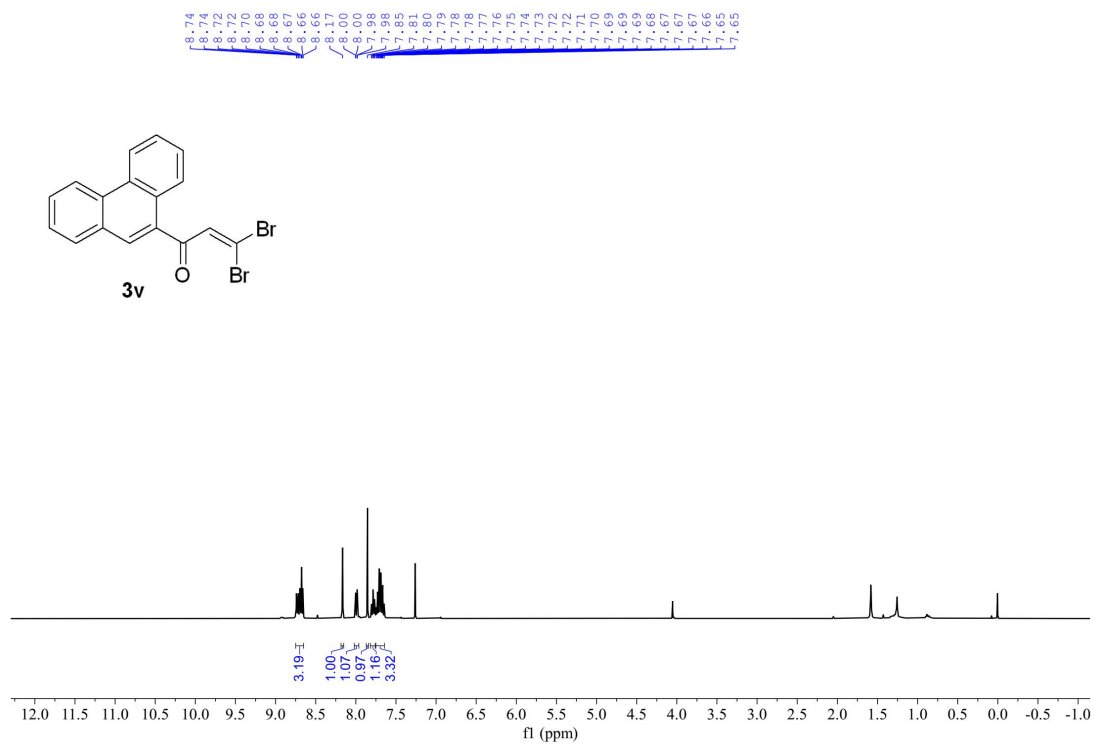



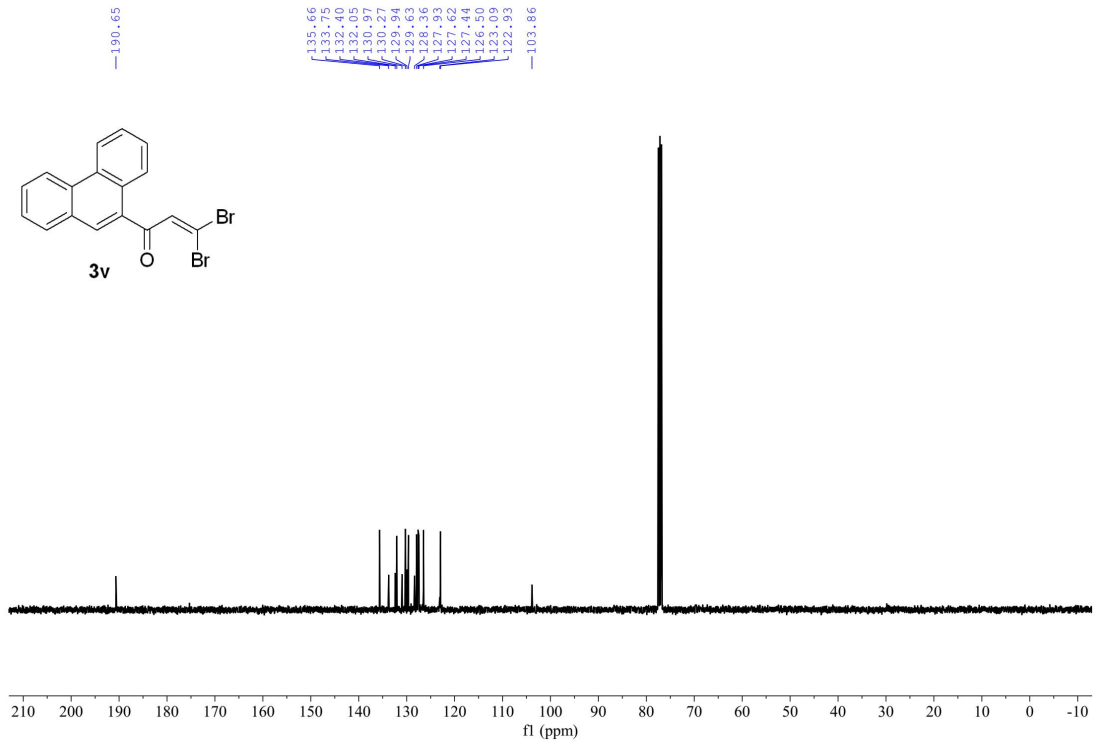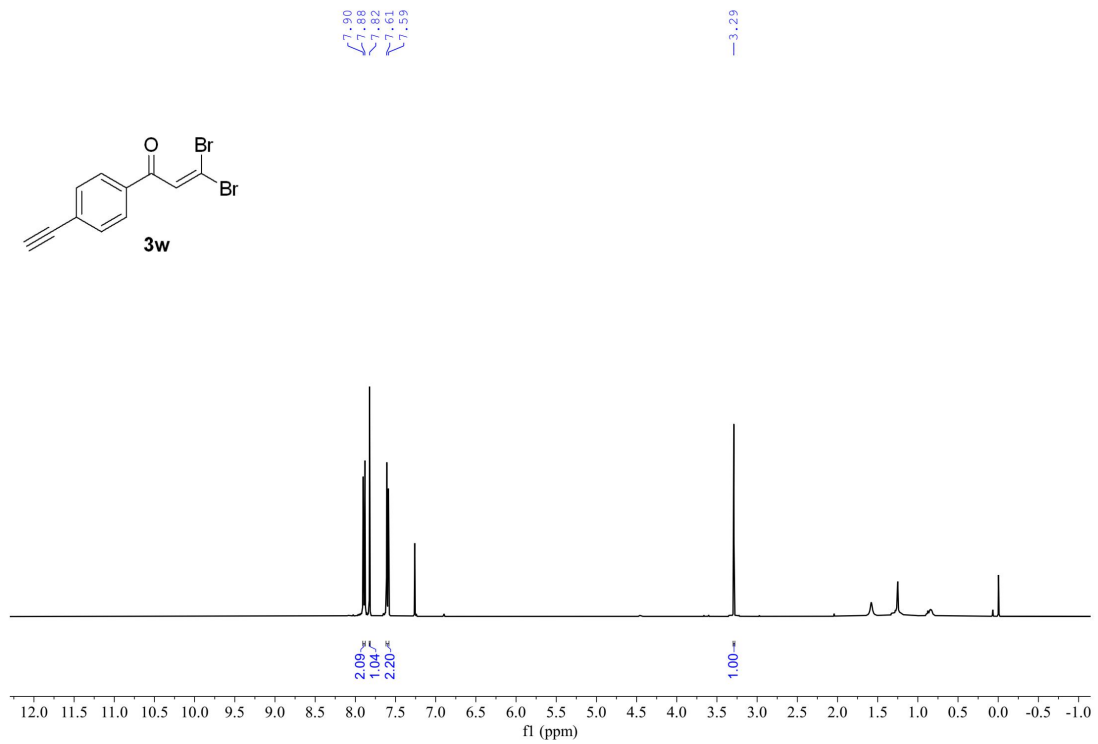

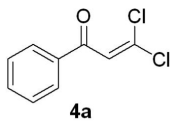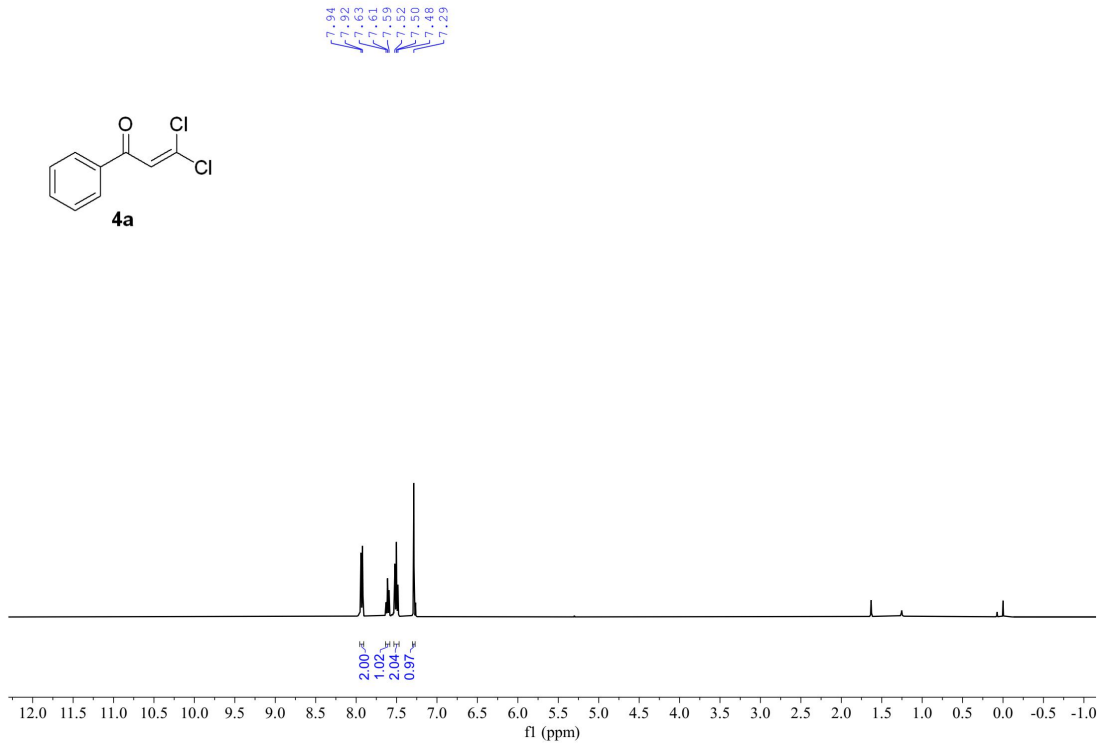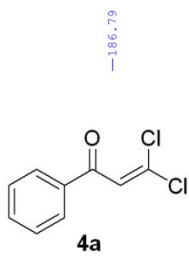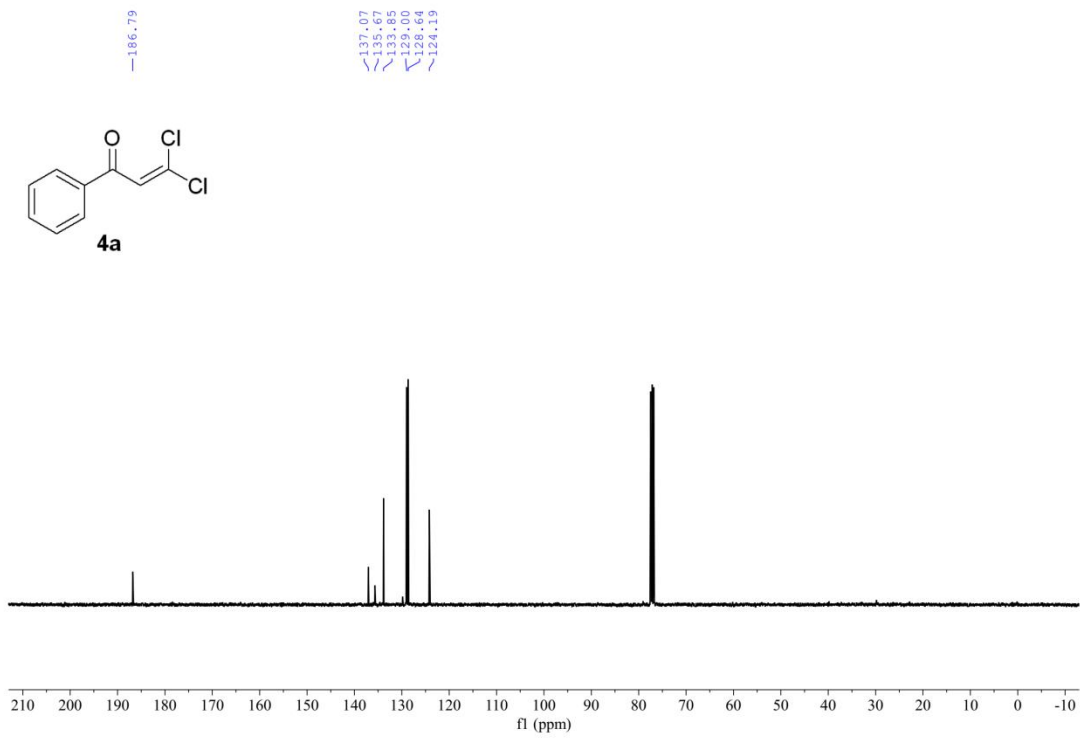

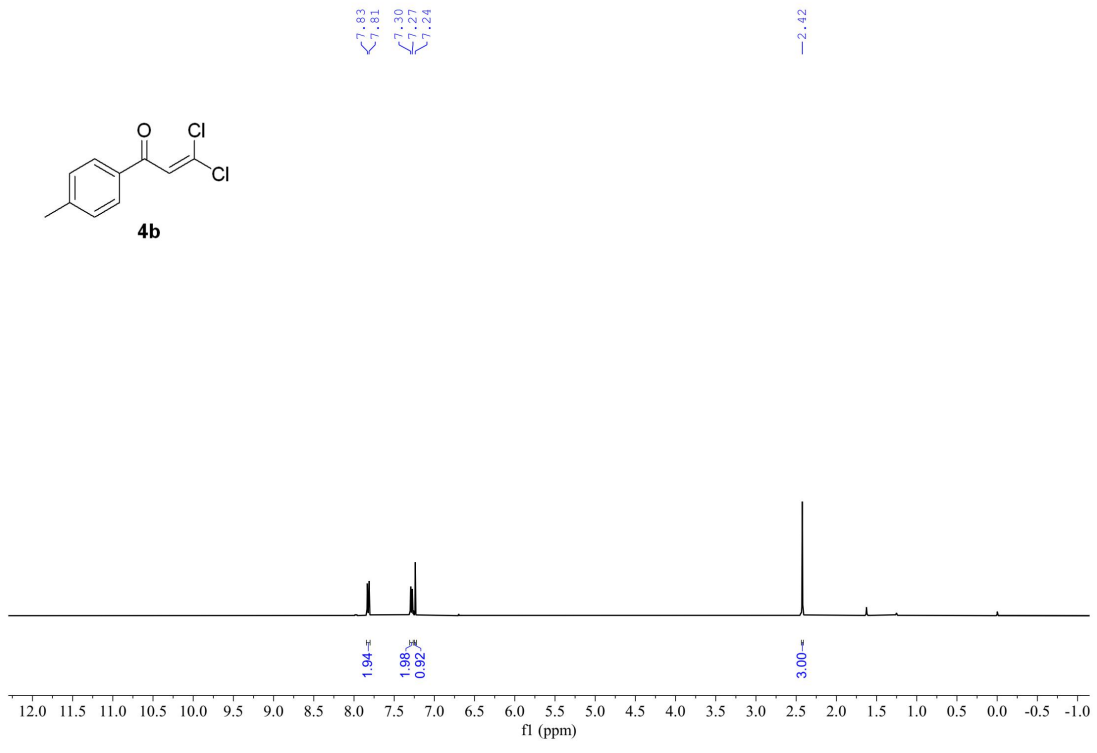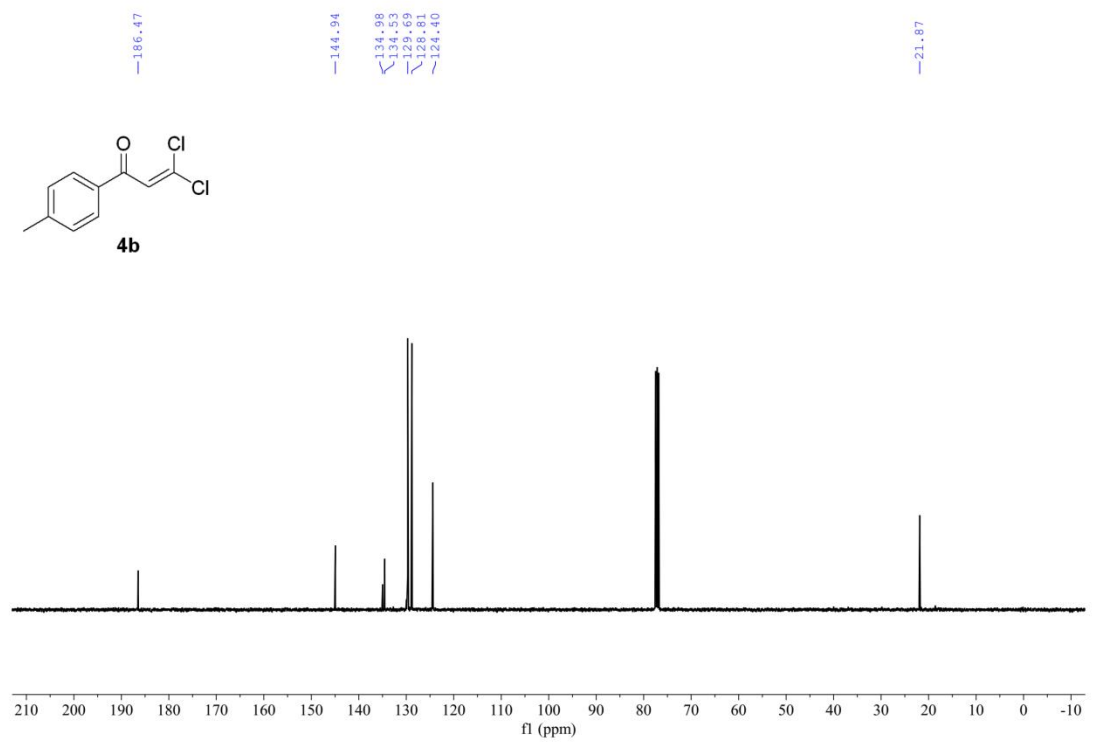

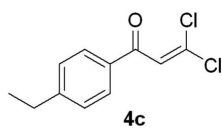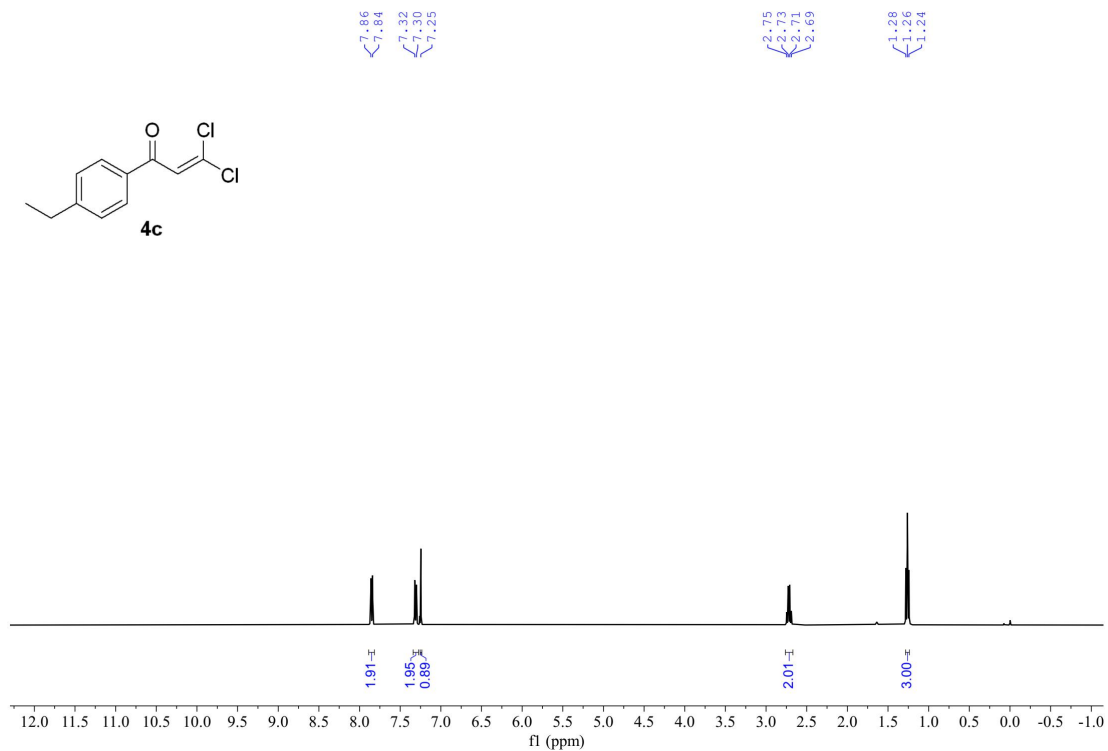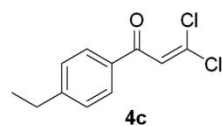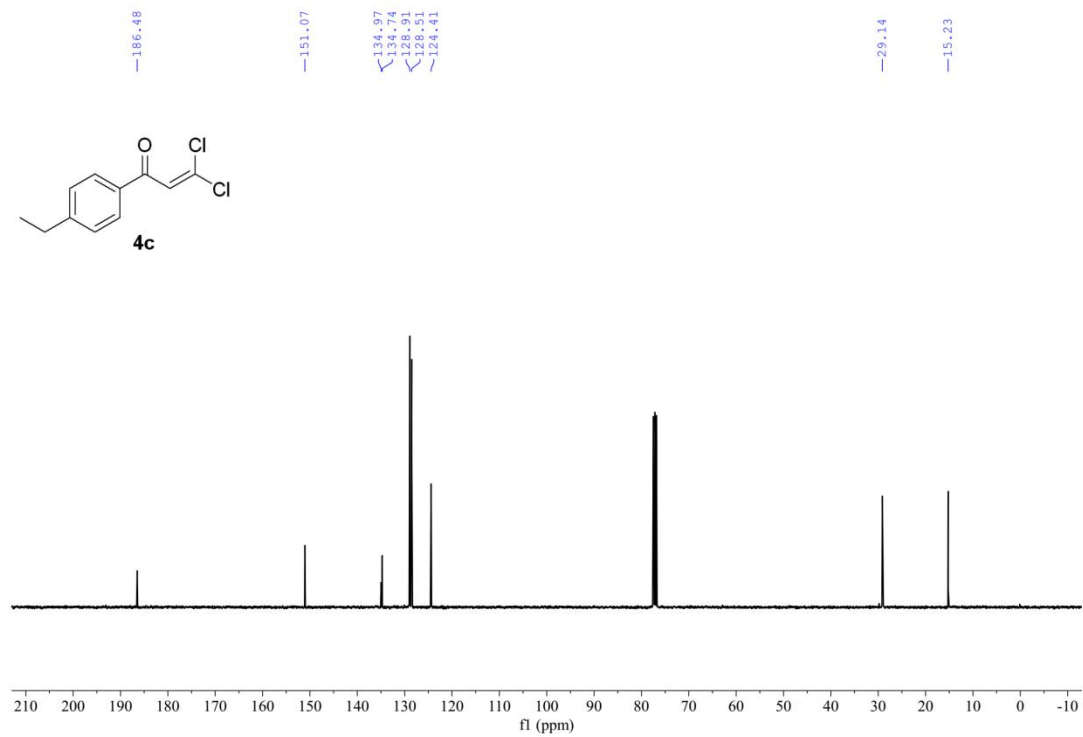

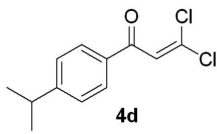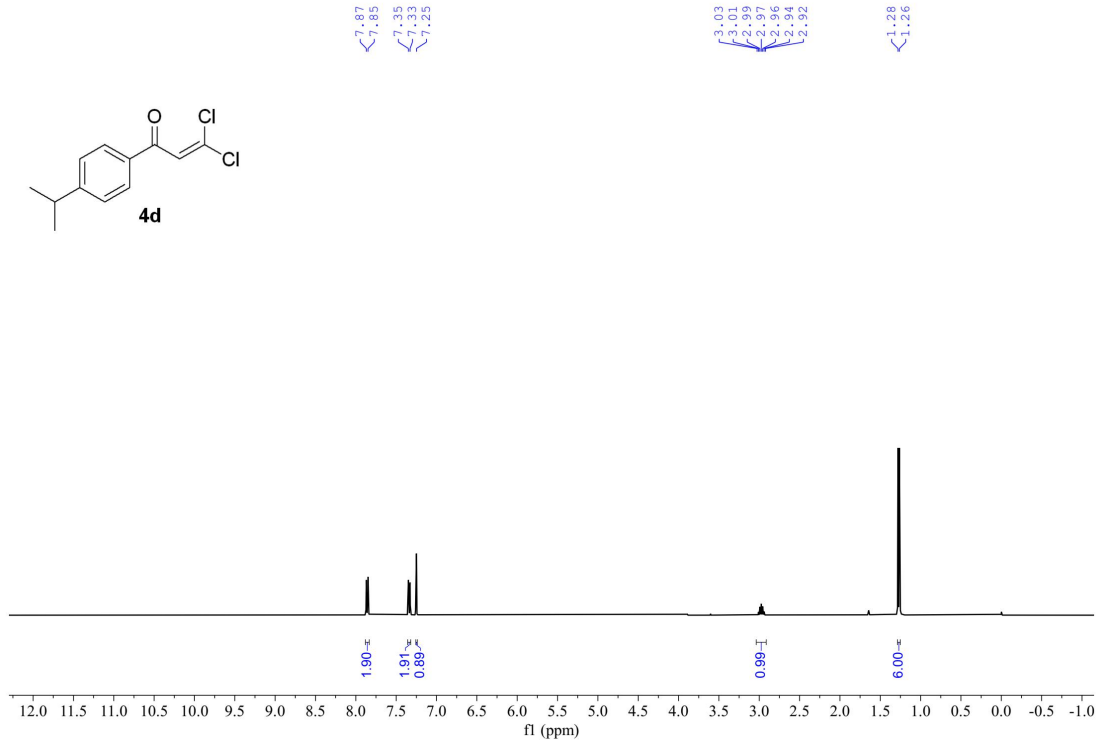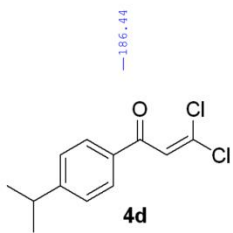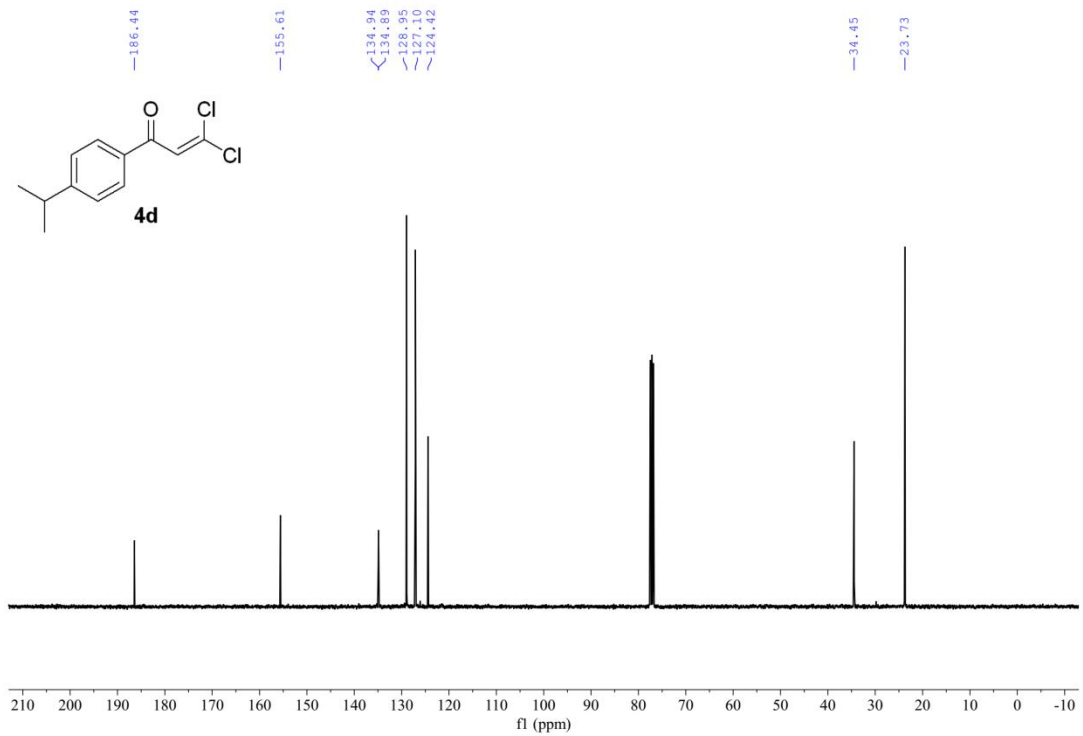

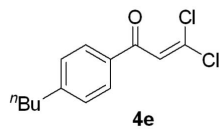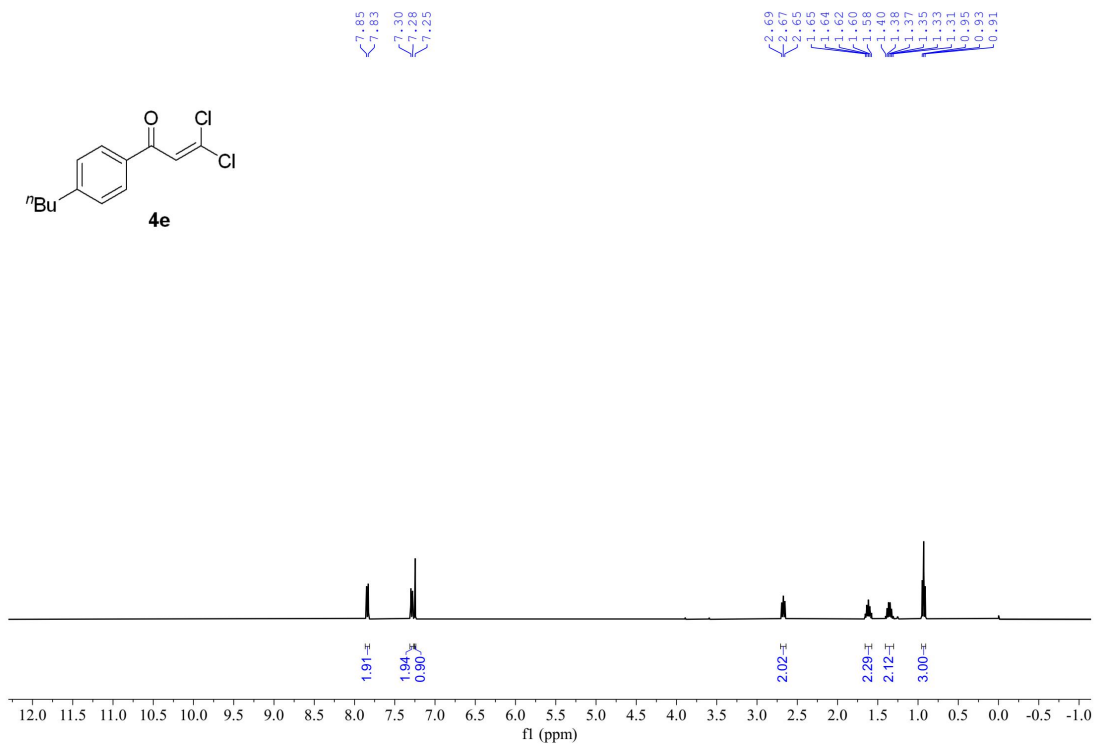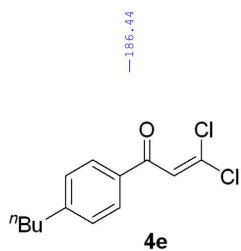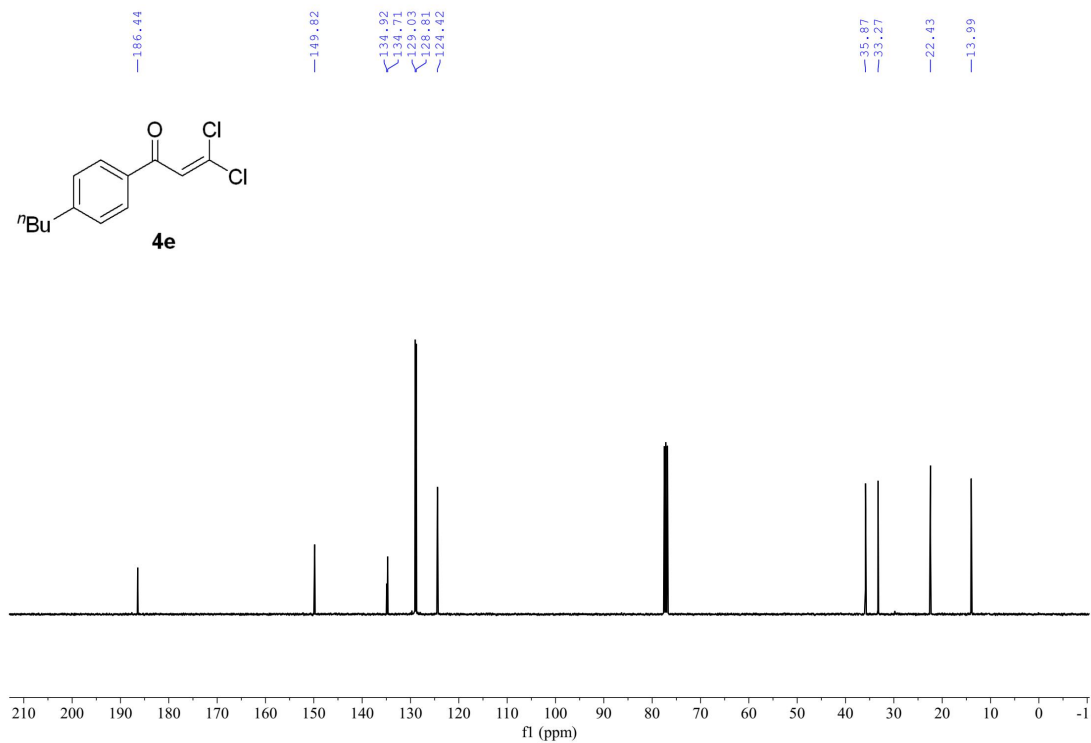

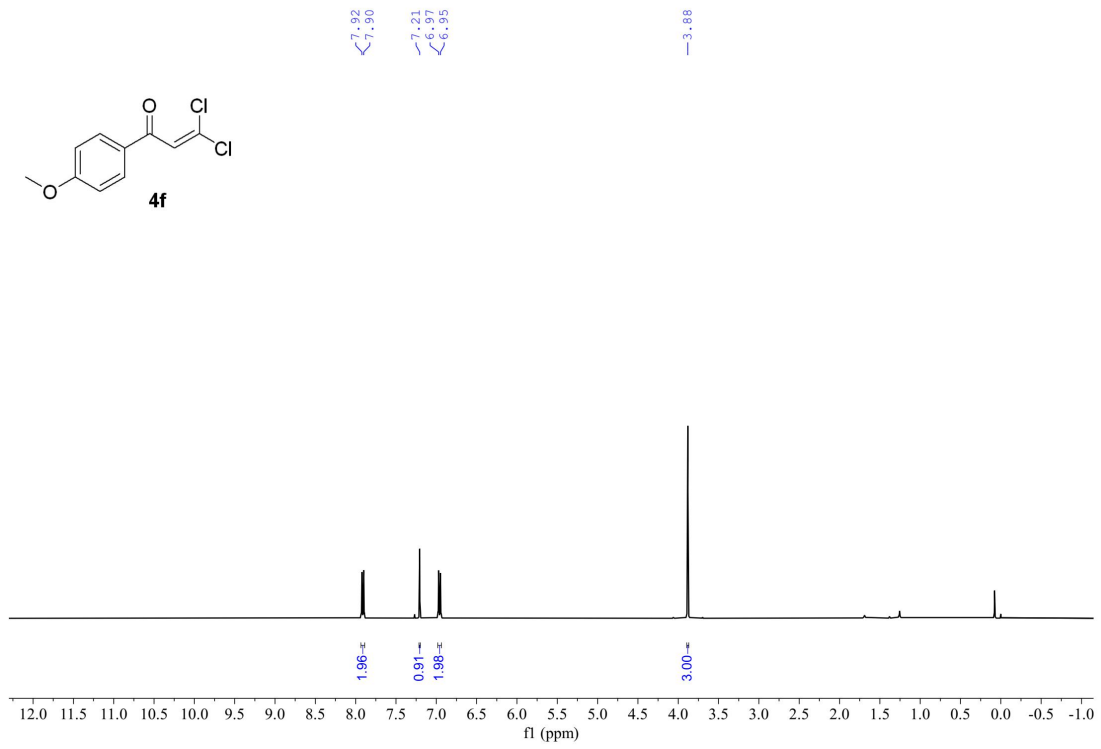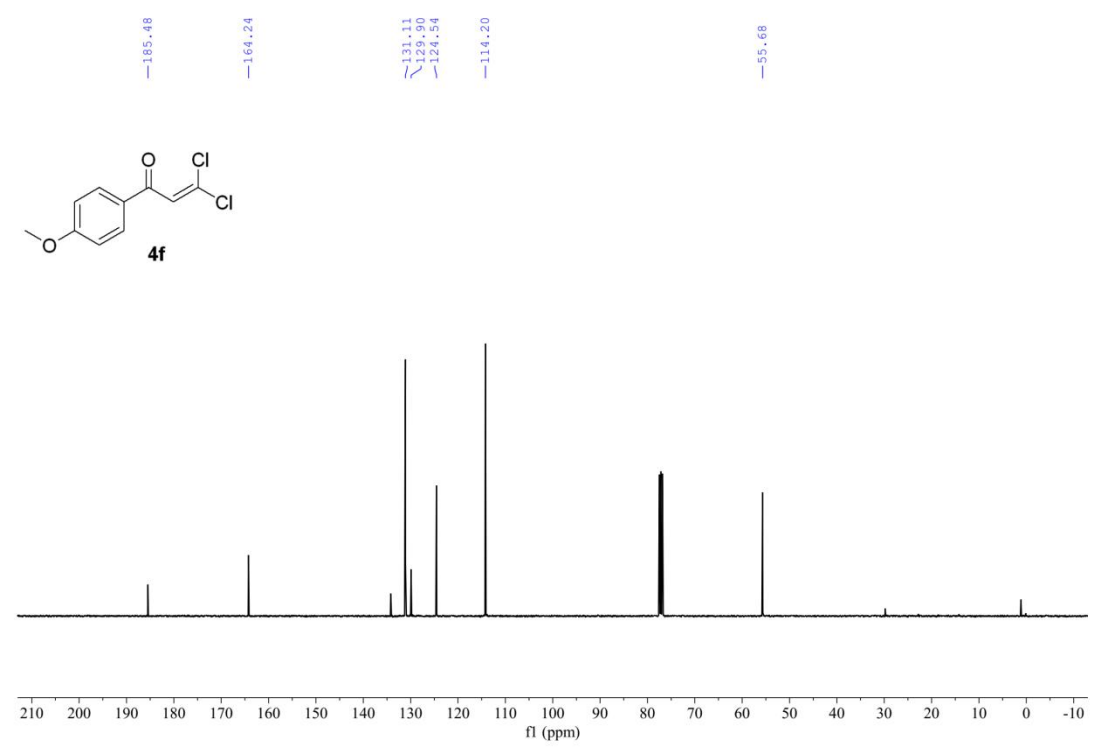

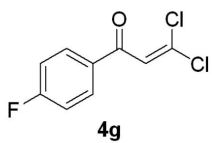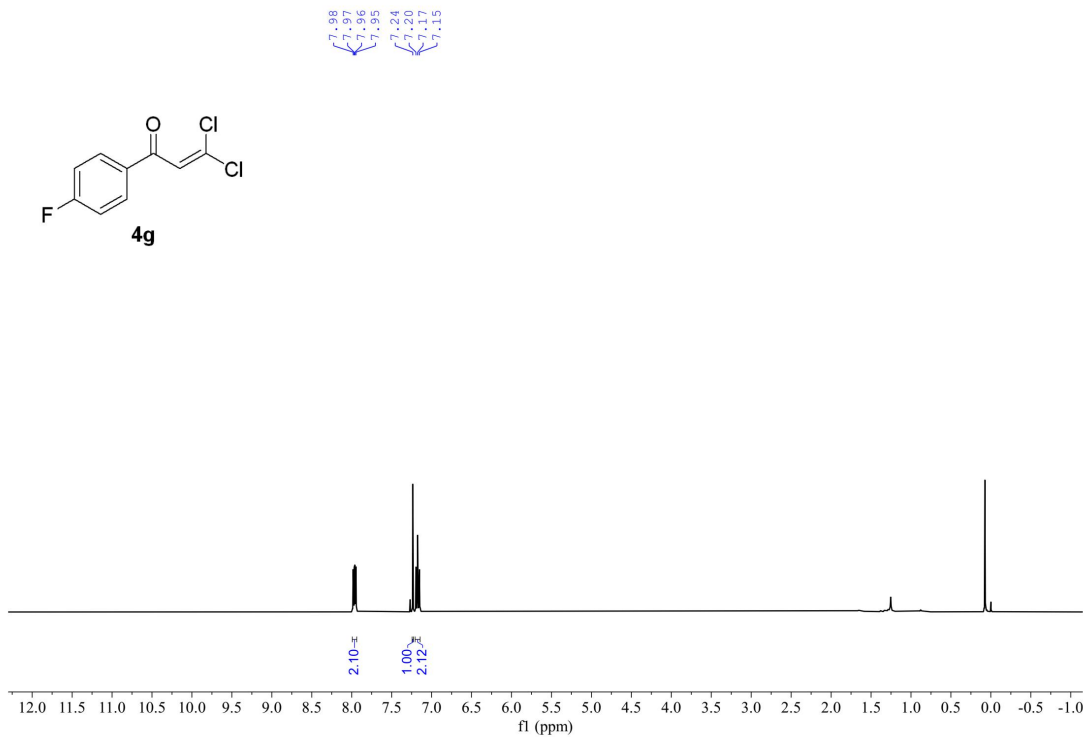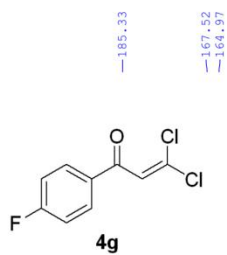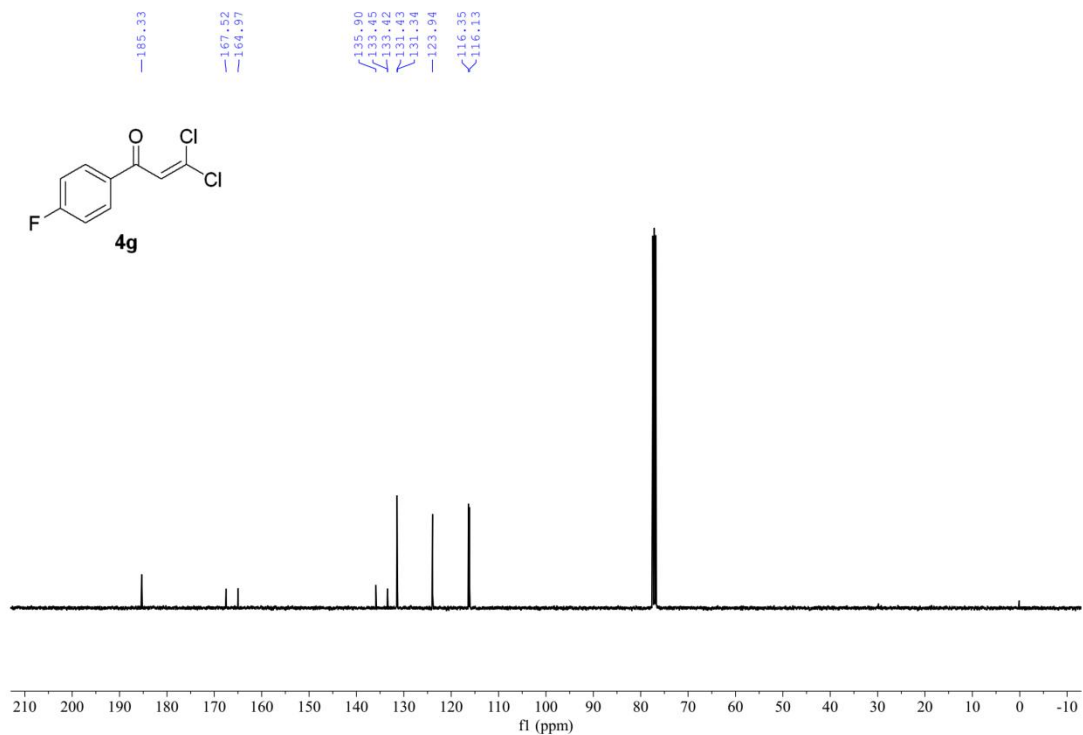



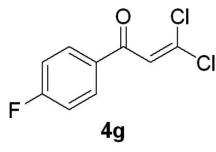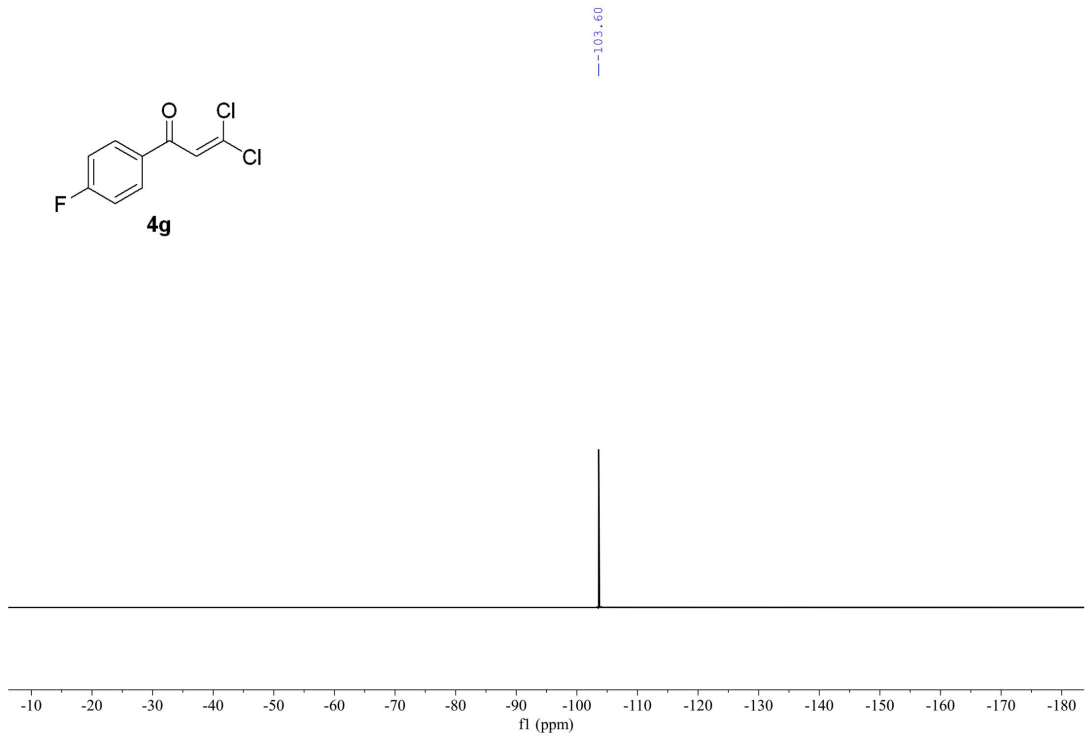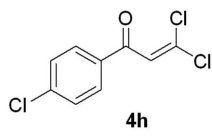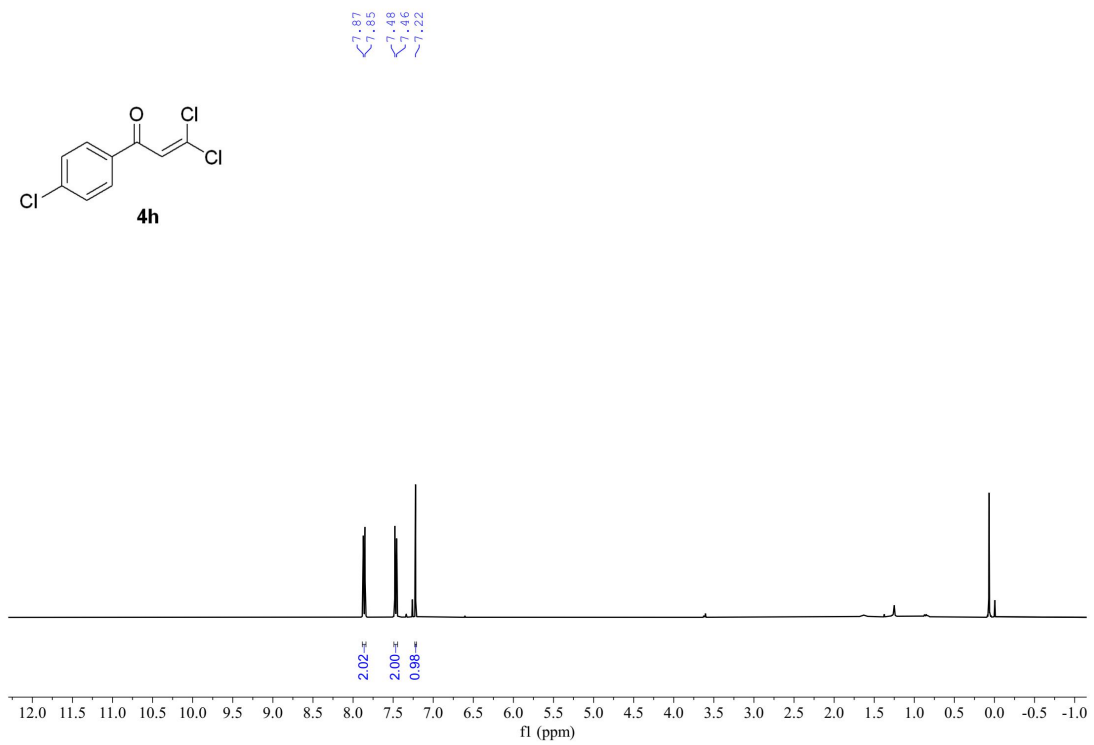

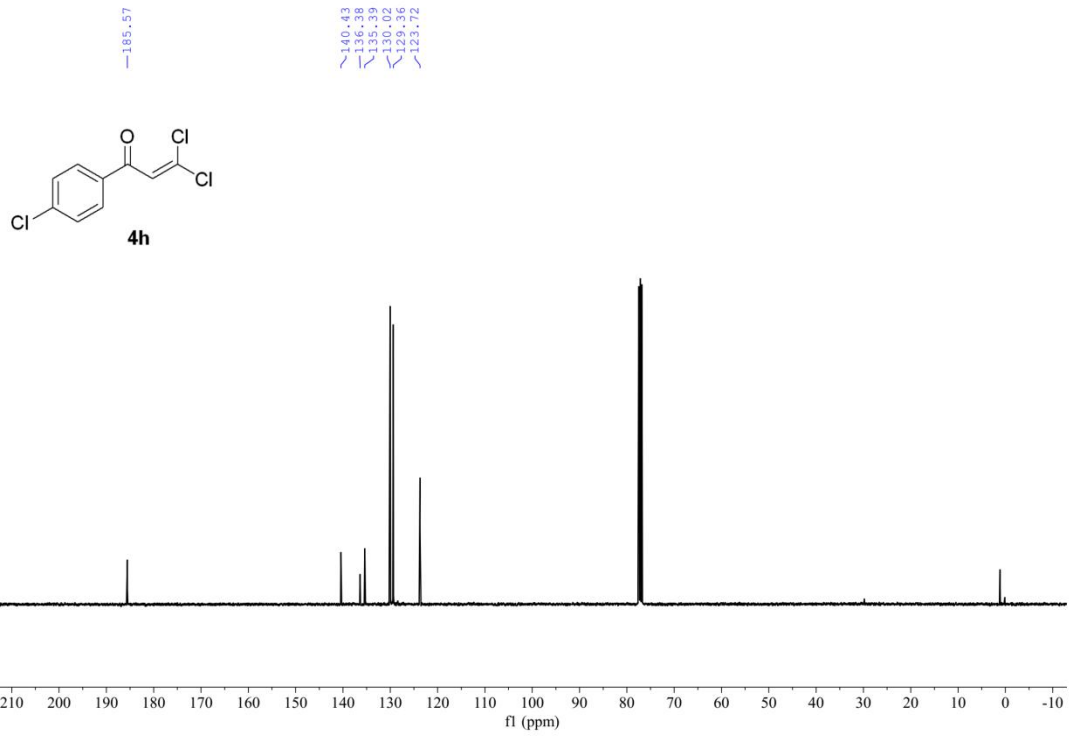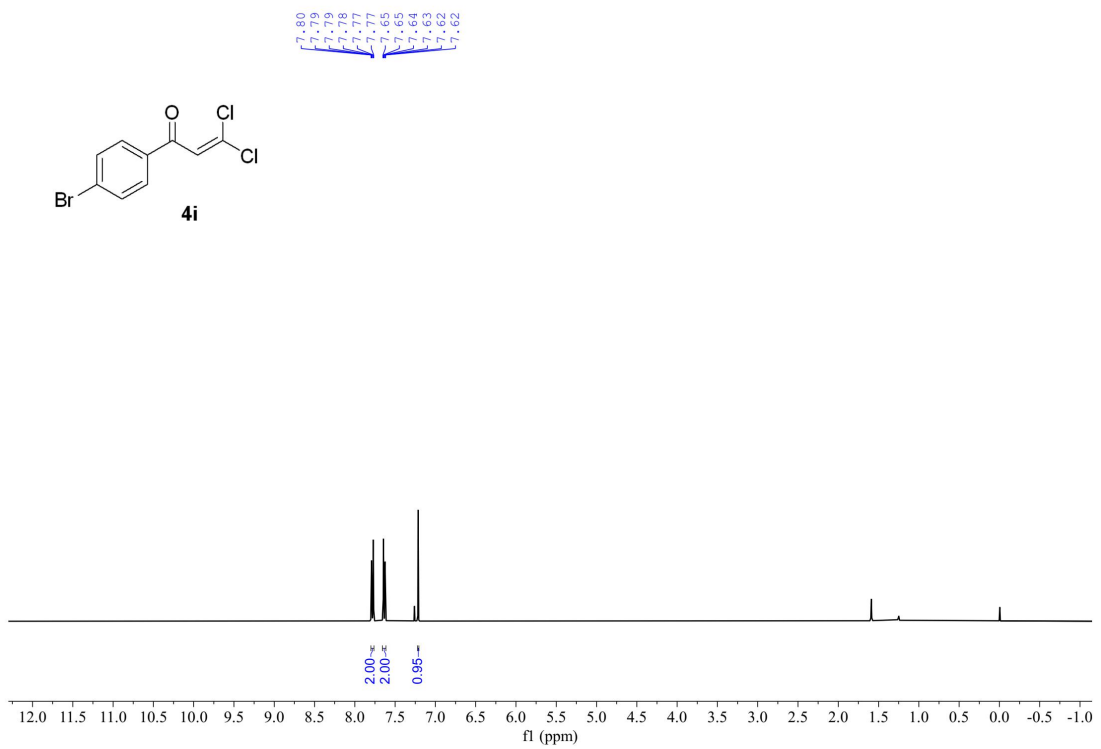

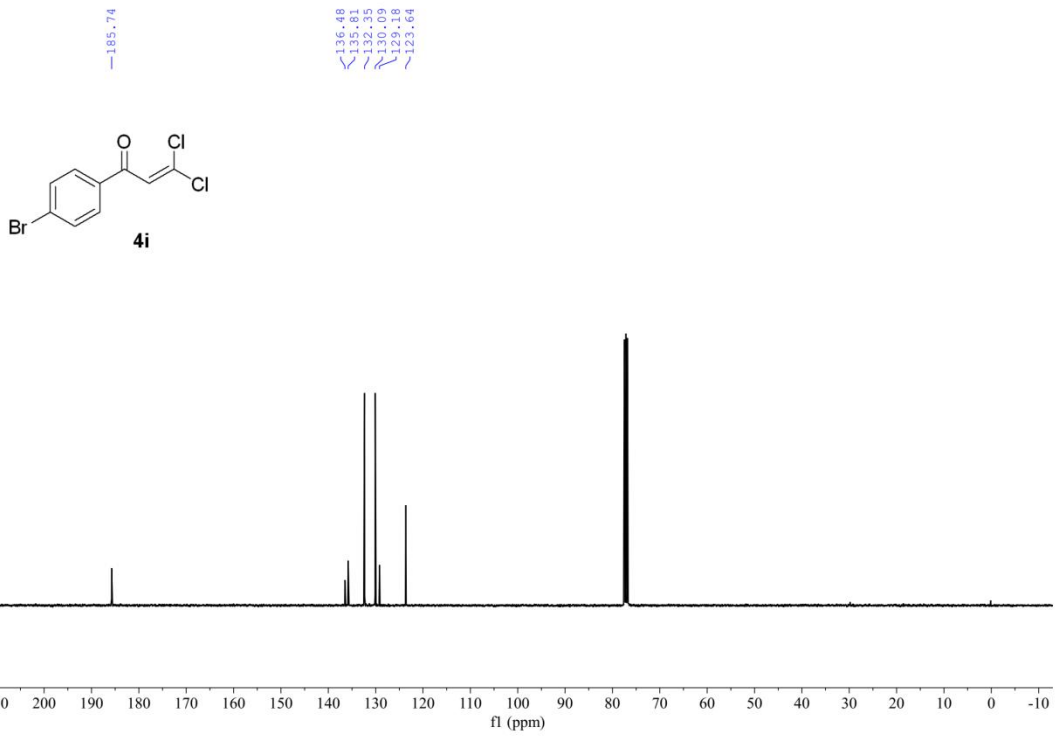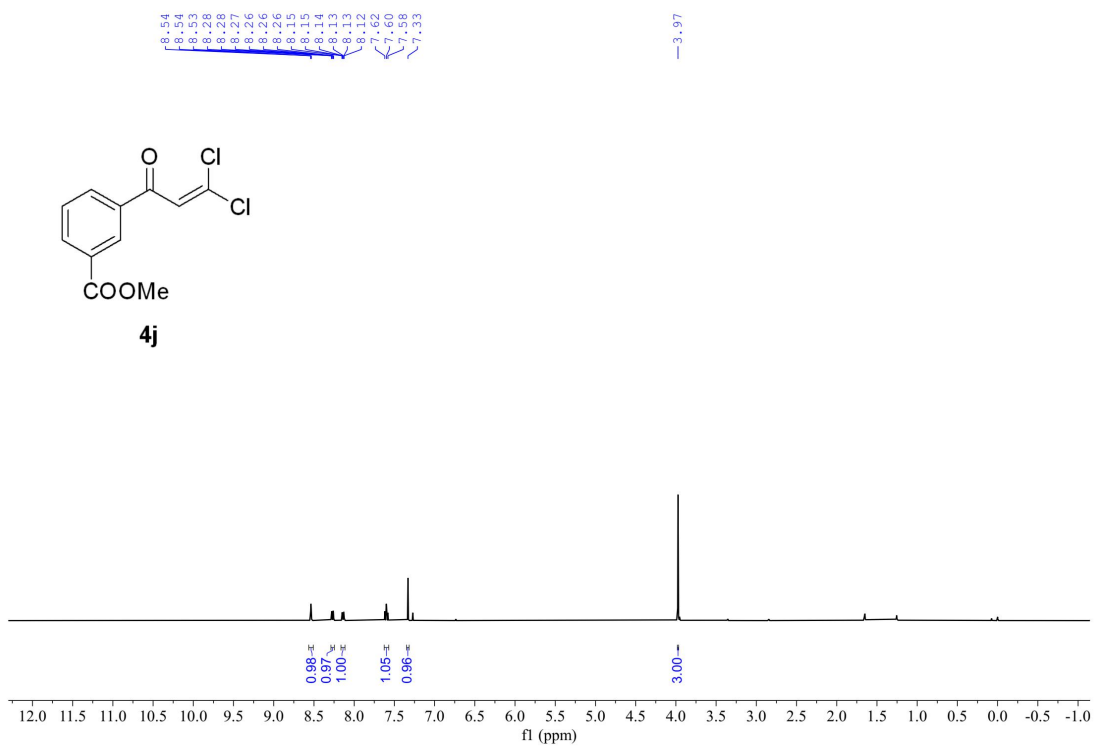

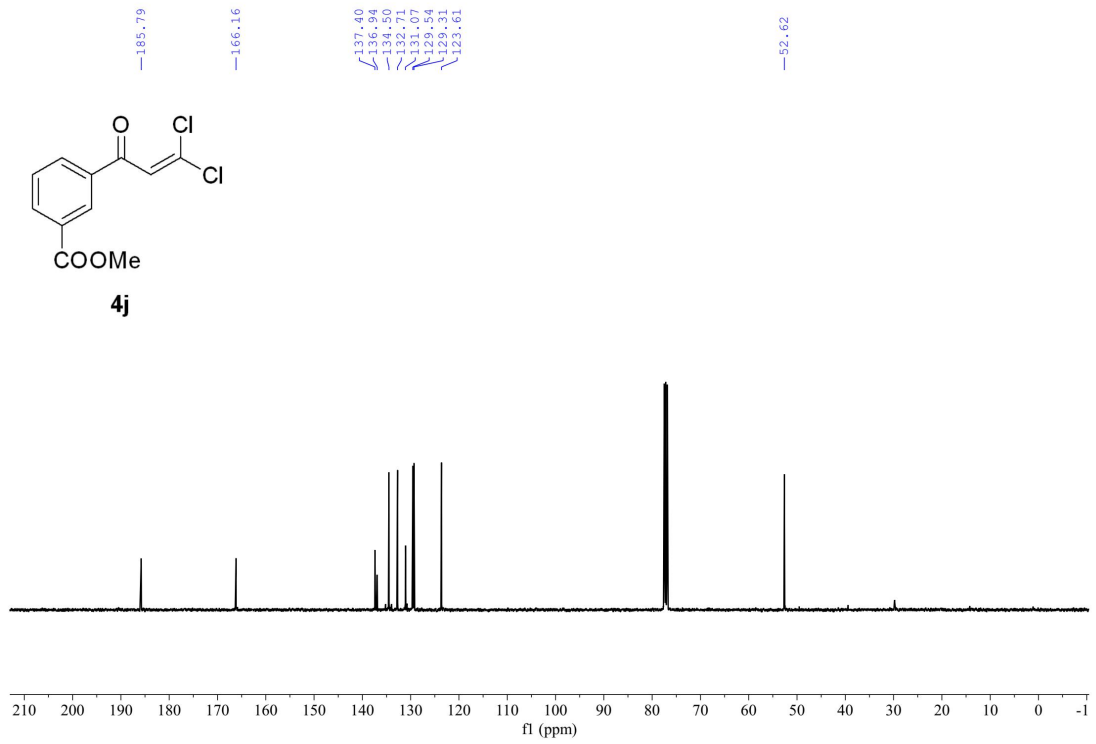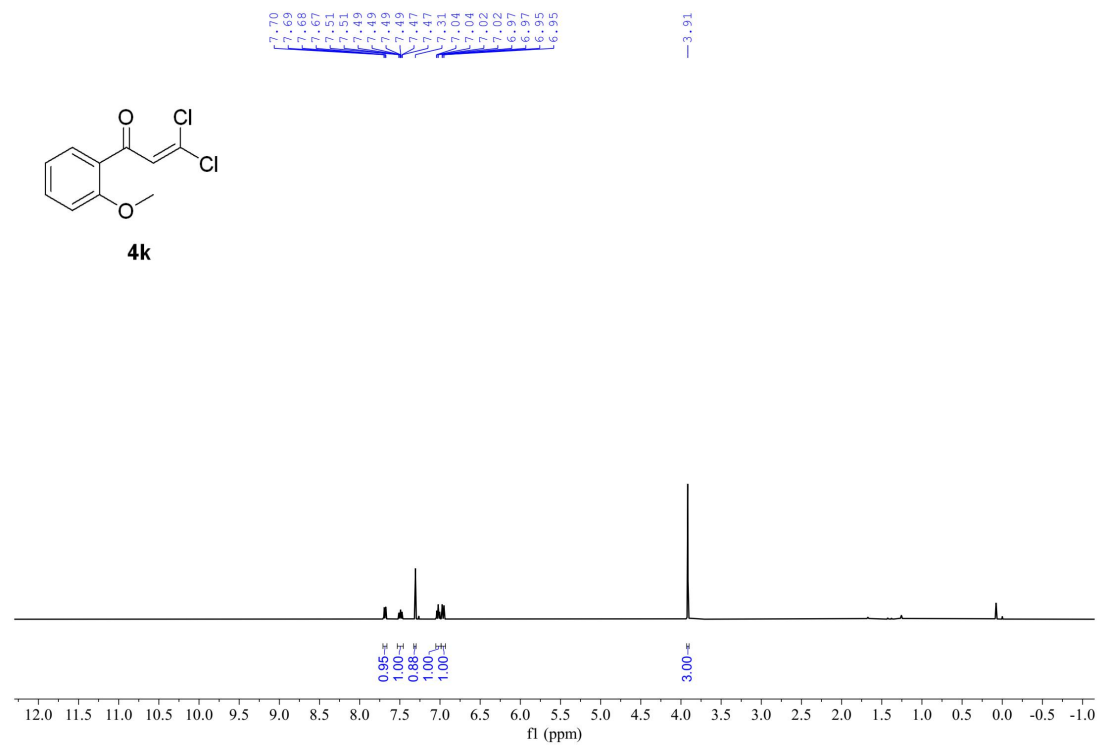

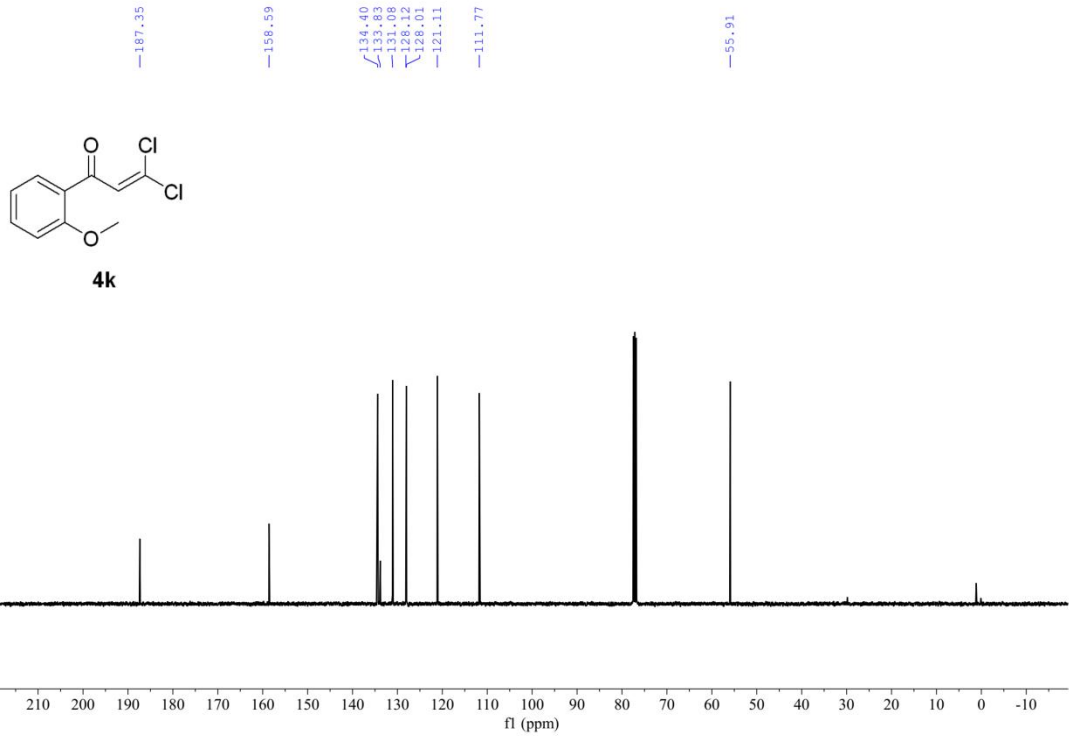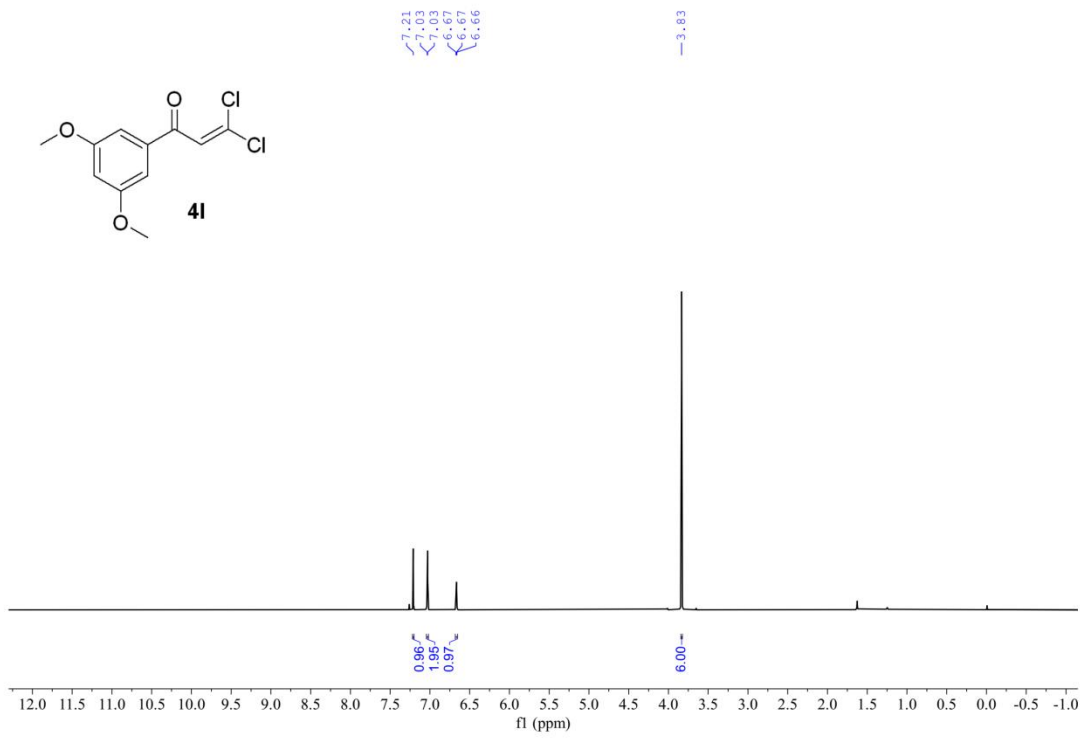

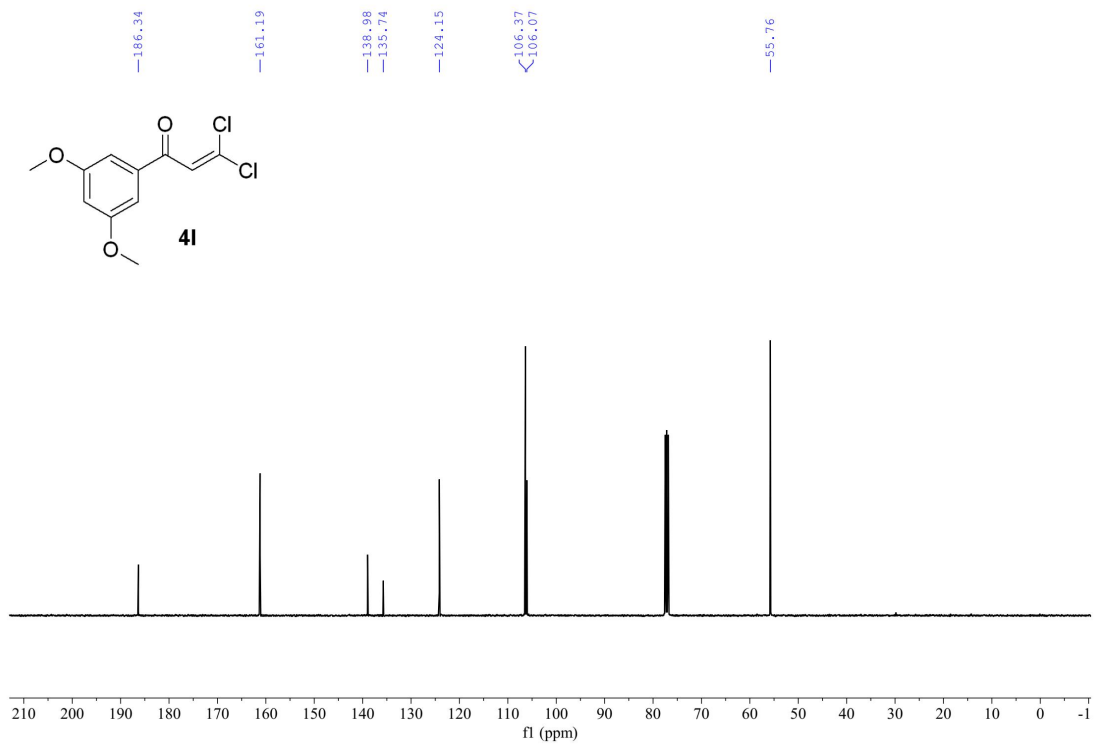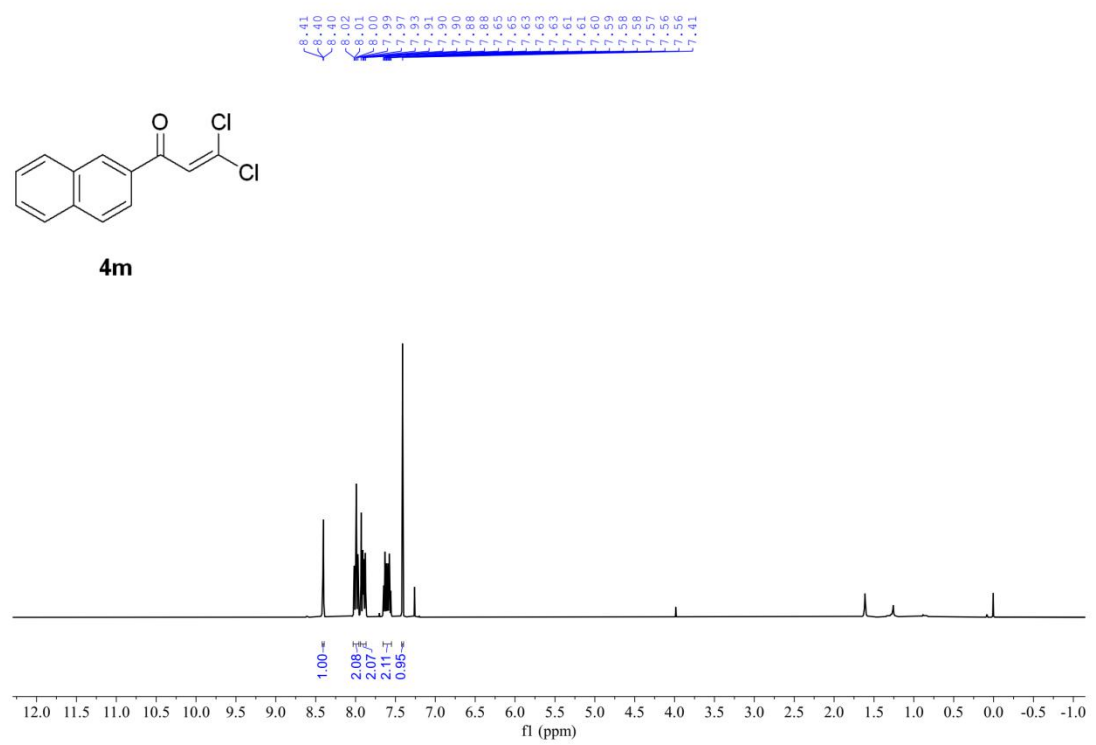

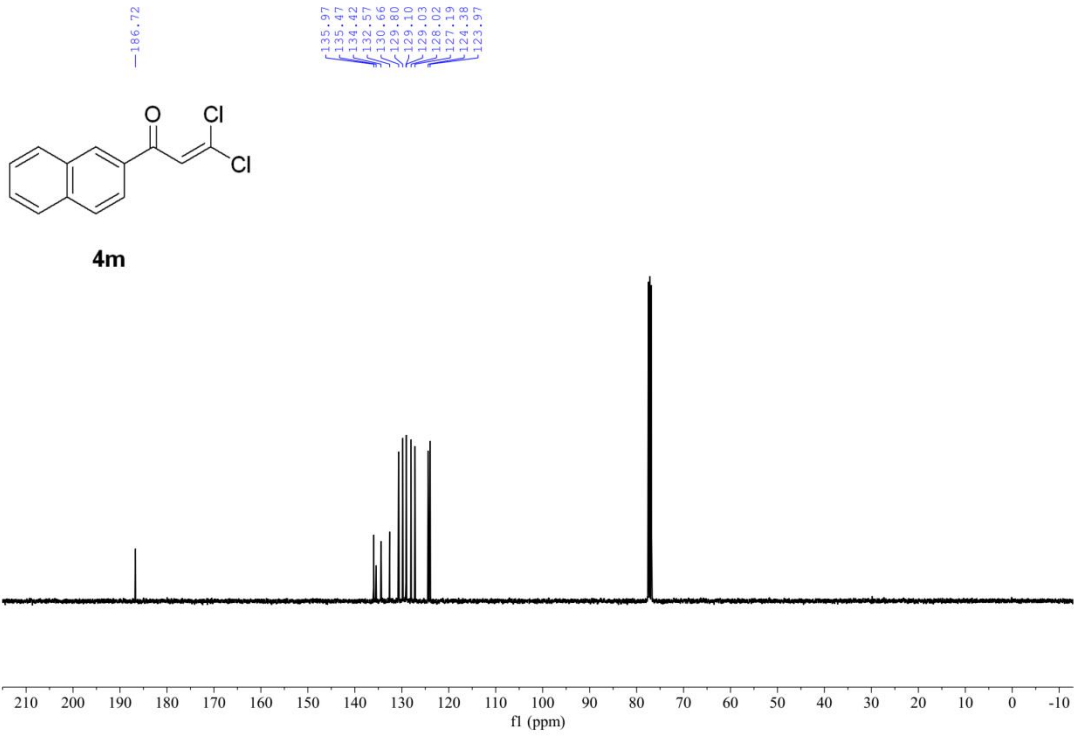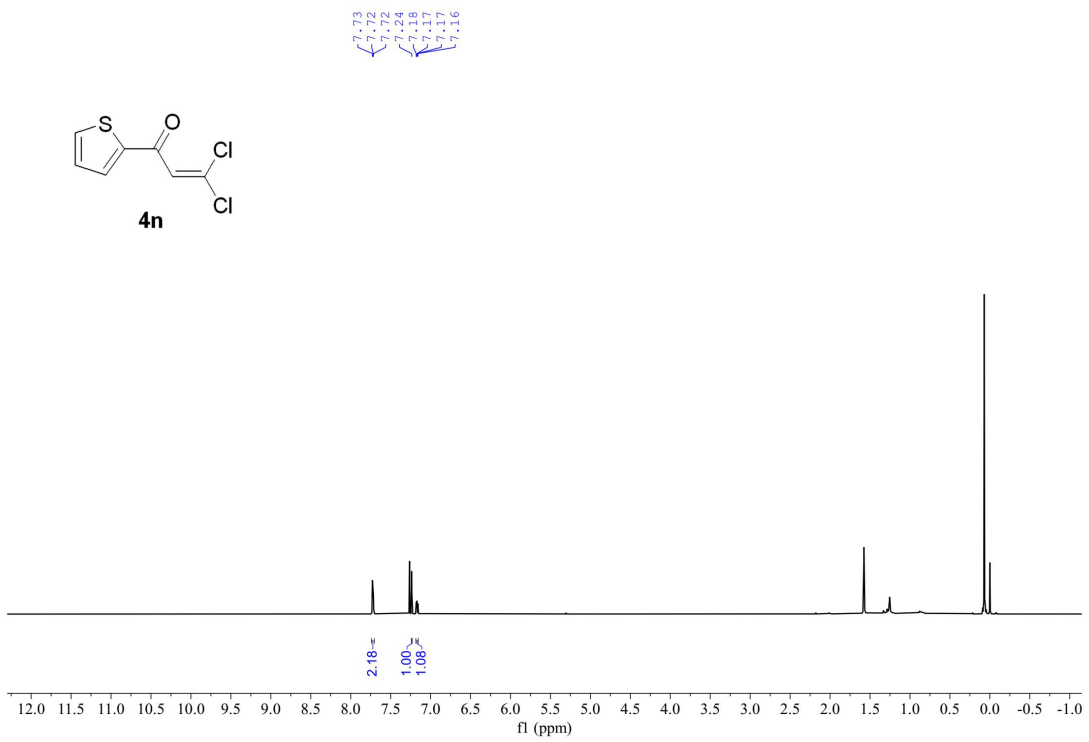

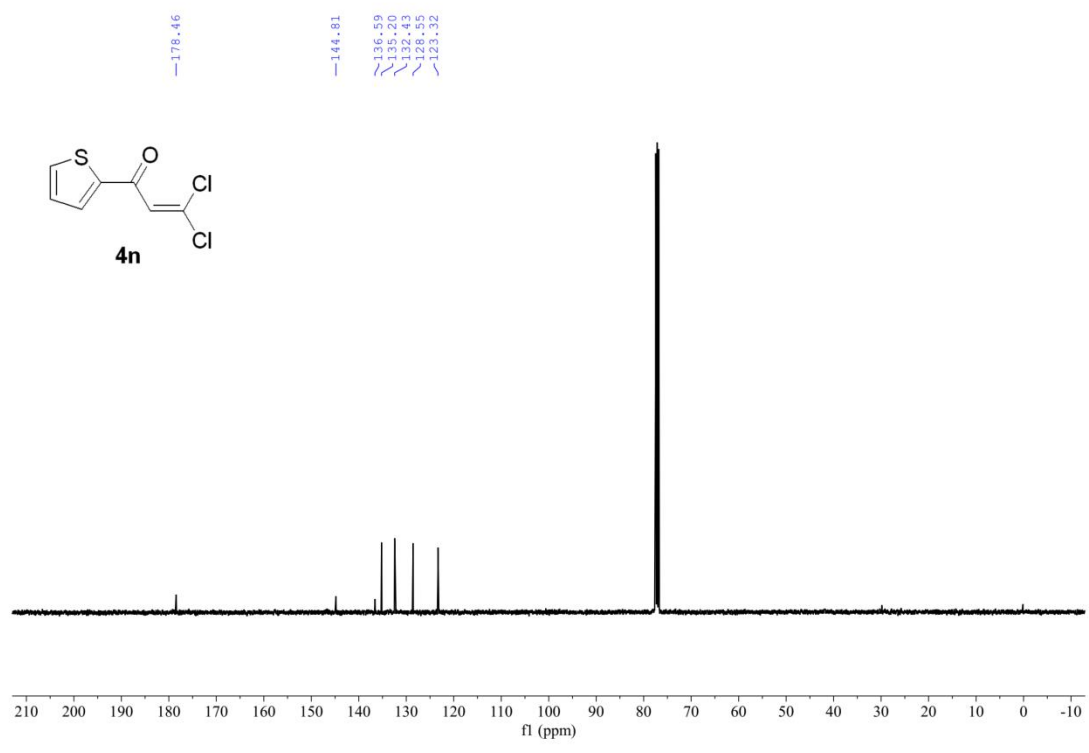



## 9. References

1. X. Zeng, Y. Xu, J. Liu , Y. Deng, *Org. Lett.*, **2021**, *23*: 9058-9062.
2. Z. Y. Xu , Y. P. Liu, X. Liu, R. Fu, W. J. Hao, J. S. Tu, B. Jiang, *Adv. Synth. Catal.*, **2022**, *364*, 2666-2672.
3. R. Taylor, S. Beltrán-Rodil, M.Edwards, D.Pugh, M. Reid, *Synlett*, **2009**, *2010*, 602-606.
4. D. K. Li, *Tetrahedron Lett.*, **2021**, *87*: 153551.
